# Supplementary material
Source: PubMed Central journal article supplement (PMC7445741)
Supplement: jo0c01235_si_004.pdf [file jo0c01235_si_004.pdf]

Supporting Information for

# **Synthesis of Core-Modified Third-Generation Light-Driven Molecular Motors**

José Augusto Berrocal,<sup>a</sup> Lukas Pfeifer,<sup>a</sup> Dorus Heijnen,<sup>a</sup> Ben L. Feringa<sup>a\*</sup>

<sup>a</sup> Stratingh Institute for Chemistry, University of Groningen, Nijenborgh 4, 9747 AG Groningen, The Netherlands

\* to whom correspondence should be addressed: [b.l.feringa@rug.nl](mailto:b.l.feringa@rug.nl)

## Table of contents

|                                                                                       |       |
|---------------------------------------------------------------------------------------|-------|
| List of all synthesized compounds                                                     | SI 3  |
| $^1\text{H}$ NMR and $^{13}\text{C}$ NMR spectra                                      | SI 14 |
| Isomeric ratio and degree of unidirectionality of motors <b>2-8</b>                   | SI 44 |
| UV-Vis spectra of motors <b>1-9</b>                                                   | SI 45 |
| FT-IR spectra                                                                         | SI 48 |
| Crystal Structure of motors <b>2, 4 and 5</b>                                         | SI 54 |
| TD- $^1\text{H}$ NMR experiments with motor <b>6</b>                                  | SI 57 |
| $^1\text{H}$ NMR <i>in situ</i> irradiation experiments at -80 °C with motor <b>6</b> | SI 58 |
| References                                                                            | SI 59 |

## List of all synthesized compounds

### dimethyl 4,5-dimethoxyphthalate (11)

(white solid).

$^1\text{H-NMR}$  ( $\text{CDCl}_3$ , 600 MHz,  $\delta$ ): 7.15 (s, 2H), 3.90 (s, 6H), 3.84 (s, 6H).

$^{13}\text{C-NMR}$   $\{^1\text{H}\}$  ( $\text{CDCl}_3$ , 150 MHz,  $\delta$ ): 167.89, 150.75, 125.19, 111.42, 56.23, 52.60.

FT-IR (dry powder) ( $\text{cm}^{-1}$ ): 3018 (C-H), 2955 (C-H), 1709 (C=O).

HR-MS ( $m/z$ ):  $[\text{M}+\text{Na}]^+$  calcd for  $\text{C}_{12}\text{H}_{14}\text{O}_6\text{Na}$  276.0683; found 276.0680 (0.8 ppm).

$M_p$  86.2-87.1  $^\circ\text{C}$ .

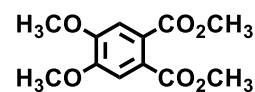

11

Compound 12 was previously characterized.<sup>S1</sup>

### dimethyl 4,5-dichlorophthalate (13)

(white solid).

$^1\text{H-NMR}$  ( $\text{CDCl}_3$ , 600 MHz,  $\delta$ ): 7.78 (s, 2H), 3.88 (s, 6H).

$^{13}\text{C-NMR}$   $\{^1\text{H}\}$  ( $\text{CDCl}_3$ , 150 MHz,  $\delta$ ): 166.04, 135.82, 131.44, 130.99, 53.08.

FT-IR (dry powder) ( $\text{cm}^{-1}$ ): 3096 (C-H), 3037 (C-H), 2956 (C-H), 1720 (C=O).

HR-MS ( $m/z$ ):  $[\text{M}+\text{H}]^+$  calcd for  $\text{C}_{10}\text{H}_9\text{Cl}_2\text{O}_4$  262.9872; found 262.9873 (0.2 ppm).

$M_p$  44.5-46  $^\circ\text{C}$ .

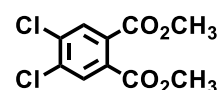

13

### dimethyl 4,5-dibromophthalate (14)

(white solid).

$^1\text{H-NMR}$  ( $\text{CDCl}_3$ , 600 MHz,  $\delta$ ): 7.96 (s, 2H), 3.91 (s, 6H).

$^{13}\text{C-NMR}$   $\{^1\text{H}\}$  ( $\text{CDCl}_3$ , 150 MHz,  $\delta$ ): 166.13, 134.08, 132.03, 128.38, 53.17.

FT-IR (dry powder) ( $\text{cm}^{-1}$ ): 2953 (C-H), 2923 (C-H), 2852 (C-H), 1730 (C=O).

HR-MS ( $m/z$ ):  $[\text{M}+\text{H}]^+$  calcd for  $\text{C}_{10}\text{H}_9\text{Br}_2\text{O}_4$  352.8842; found 352.8841 (0.2 ppm).

$M_p$  72.6-74.3  $^\circ\text{C}$ .

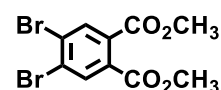

14

### dimethyl [1,1':2',1''-terphenyl]-4',5'-dicarboxylate (15)

Synthesized with general method G.

(off-white solid).

$^1\text{H-NMR}$  ( $\text{CDCl}_3$ , 600 MHz,  $\delta$ ): 7.80 (s, 2H), 7.24-7.23 (m, 6H), 7.15-7.13

(m, 4H), 3.94 (s, 6H).

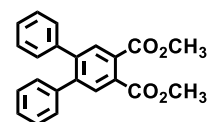

15

$^{13}\text{C}$ -NMR  $\{^1\text{H}\}$  ( $\text{CDCl}_3$ , 150 MHz,  $\delta$ ): 167.98, 143.57, 139.71, 131.39, 130.89, 129.76, 128.28, 127.55, 52.84.

FT-IR (dry powder) ( $\text{cm}^{-1}$ ): 2955 ( $C-H$ ), 1721 ( $C=O$ ).

HR-MS ( $m/z$ ):  $[\text{M}+\text{Na}]^+$  calcd for  $\text{C}_{22}\text{H}_{18}\text{O}_4\text{Na}$  369.1097; found 369.1094 (0.9 ppm).

$M_p$  108.8-110.1  $^\circ\text{C}$ .

**dimethyl 4,4''-dimethoxy-[1,1':2',1''-terphenyl]-4',5'-dicarboxylate**

(16)

(off-white solid).

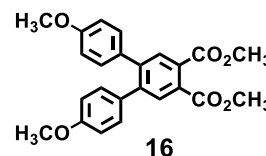

$^1\text{H}$ -NMR ( $\text{CDCl}_3$ , 600 MHz,  $\delta$ ): 7.74 (s, 2H), 7.07-7.06 (AA'BB' system, 4H), 6.79-6.77 (AA'BB' system, 4H), 3.93 (s, 6H), 3.78 (s, 6H).

$^{13}\text{C}$ -NMR  $\{^1\text{H}\}$  ( $\text{CDCl}_3$ , 150 MHz,  $\delta$ ): 168.10, 159.08, 143.04, 132.23, 131.32, 130.89, 130.47, 113.81, 55.34, 52.77.

FT-IR (dry powder) ( $\text{cm}^{-1}$ ): 2955 ( $C-H$ ), 2841 ( $C-H$ ), 1722 ( $C=O$ ).

HR-MS ( $m/z$ ):  $[\text{M}+\text{Na}]^+$  calcd for  $\text{C}_{24}\text{H}_{22}\text{O}_6\text{Na}$  429.1309; found 429.1303 (1.4 ppm).

$M_p$  113.6-115.1  $^\circ\text{C}$ .

**dimethyl 4,4''-bis((tert-butyldimethylsilyloxy)-[1,1':2',1''-terphenyl]-4',5'-dicarboxylate (17)**

(transparent oil).

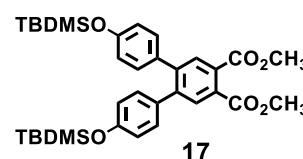

$^1\text{H}$ -NMR ( $\text{CDCl}_3$ , 600 MHz,  $\delta$ ): 7.75 (s, 2H), 6.99-6.98 (AA'BB' system, 4H), 6.71-6.69 (AA'BB' system, 4H), 3.93 (s, 6H), 0.97 (s, 18H), 0.18 (s, 12H).

$^{13}\text{C}$ -NMR  $\{^1\text{H}\}$  ( $\text{CDCl}_3$ , 150 MHz,  $\delta$ ): 168.16, 155.29, 143.23, 132.89, 131.18, 130.91, 130.45, 120.85, 119.99, 116.04, 52.78, 25.85, 25.81, 18.39, -4.28.

FT-IR (dry liquid) ( $\text{cm}^{-1}$ ): 2954 ( $C-H$ ), 2930 ( $C-H$ ), 2858 ( $C-H$ ), 1728 ( $C=O$ ), 1244 ( $\text{Si-O}$ ).

HR-MS ( $m/z$ ):  $[\text{M}+\text{H}]^+$  calcd for HR-MS  $\text{C}_{34}\text{H}_{47}\text{O}_6\text{Si}_2$  607.2906; found 607.2887 (3.1 ppm).

**tetramethyl benzene-1,2,4,5-tetracarboxylate (18)**

(white solid).

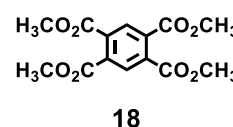

$^1\text{H}$ -NMR ( $\text{CDCl}_3$ , 600 MHz,  $\delta$ ): 8.07 (s, 2H), 3.94 (s, 12H).

$^{13}\text{C}$ -NMR  $\{^1\text{H}\}$  ( $\text{CDCl}_3$ , 150 MHz,  $\delta$ ): 166.47, 134.38, 129.79, 53.22.

FT-IR (dry powder) ( $\text{cm}^{-1}$ ): 2956 ( $C-H$ ), 1720 ( $C=O$ ).

HR-MS ( $m/z$ ):  $[\text{M}+\text{Na}]^+$  calcd for  $\text{C}_{14}\text{H}_{14}\text{O}_8\text{Na}$  333.0581; found 333.0579 (0.6 ppm).

$M_p$  137.1-138.9  $^\circ\text{C}$ .

Compound **19** was previously reported<sup>S2</sup> and characterized (synthesized in 75% yield).

**5,6-dimethoxy-2-methyl-2-phenyl-1H-indene-1,3(2H)-dione (20)**

(off-white solid).

<sup>1</sup>H-NMR (CDCl<sub>3</sub>, 600 MHz, δ): 7.32 (s, 2H), 7.28-7.15 (m, 5H), 3.96 (s, 6H), 1.63 (s, 3H).

<sup>13</sup>C-NMR {<sup>1</sup>H} (CDCl<sub>3</sub>, 150 MHz, δ): 201.02, 156.41, 138.42, 136.47, 129.42, 128.82, 128.80, 128.77, 127.57, 126.75, 103.95, 57.63, 56.84, 19.97.

FT-IR (dry powder) (cm<sup>-1</sup>): 3012 (C-H), 2979 (C-H), 2959 (C-H), 1688 (C=O).

HR-MS (*m/z*): [M+H]<sup>+</sup> calcd for C<sub>18</sub>H<sub>18</sub>O<sub>4</sub> 297.1121; found 297.1120 (0.5 ppm).

M<sub>p</sub> 168.2-170.7 °C.

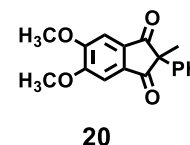

**2-methyl-2-phenyl-1H-cyclopenta[b]naphthalene-1,3(2H)-dione (21)**

(off-white solid).

<sup>1</sup>H-NMR (CDCl<sub>3</sub>, 600 MHz, δ): 8.58 (s, 2H), 8.12-8.11 (m, 2H), 7.73-7.71 (m, 2H), 7.39-7.38 (m, 2H), 7.31-7.23 (m, 3H), 1.78 (s, 3H).

<sup>13</sup>C-NMR {<sup>1</sup>H} (CDCl<sub>3</sub>, 150 MHz, δ): 202.30, 138.22, 136.87, 136.32, 130.71, 129.84, 128.95, 127.70, 126.88, 125.20, 59.65, 20.26.

FT-IR (dry powder) (cm<sup>-1</sup>): 2979 (C-H), 2934 (C-H), 2867 (C-H), 1688 (C=O).

HR-MS (*m/z*): [M+H]<sup>+</sup> calcd for C<sub>20</sub>H<sub>16</sub>O<sub>2</sub> 287.1067; found 287.1065 (0.5 ppm).

M<sub>p</sub> 113.1-115.6 °C.

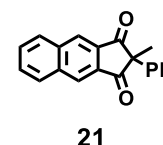

**5,6-dichloro-2-methyl-2-phenyl-1H-indene-1,3(2H)-dione (22)**

(off-white solid).

<sup>1</sup>H-NMR (CDCl<sub>3</sub>, 600 MHz, δ): 8.07 (s, 2H), 7.28-7.21 (m, 5H), 1.66 (s, 3H).

<sup>13</sup>C-NMR {<sup>1</sup>H} (CDCl<sub>3</sub>, 150 MHz, δ): 199.73, 141.64, 140.07, 137.17, 129.12, 128.07, 126.67, 125.74, 58.46, 20.27.

FT-IR (dry powder) (cm<sup>-1</sup>): 2929 (C-H), 1709 (C=O).

HR-MS (*m/z*): [M+H]<sup>+</sup> calcd for C<sub>16</sub>H<sub>12</sub>Cl<sub>2</sub>O<sub>2</sub> 305.0131; found 305.0129 (0.4 ppm).

M<sub>p</sub> 104.9-106.8 °C.

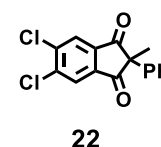

**5,6-dibromo-2-methyl-2-phenyl-1H-indene-1,3(2H)-dione (23)**

(off-white solid).

<sup>1</sup>H-NMR (CDCl<sub>3</sub>, 600 MHz, δ): 8.25 (s, 2H), 7.27-7.21 (m, 5H), 1.66 (s, 3H).

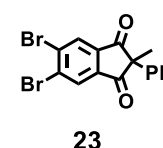

$^{13}\text{C}$ -NMR  $\{^1\text{H}\}$  ( $\text{CDCl}_3$ , 150 MHz,  $\delta$ ): 199.81, 140.52, 137.14, 134.46, 129.13, 129.12, 128.96, 128.08, 126.68, 58.44, 20.25.

FT-IR (dry powder) ( $\text{cm}^{-1}$ ): 3072 (*C-H*), 2934 (*C-H*), 1707 (*C=O*).

HR-MS ( $m/z$ ):  $[\text{M}+\text{H}]^+$  calcd for  $\text{C}_{16}\text{H}_{12}\text{Br}_2\text{O}_2$  392.9120; found 392.9189 (0.4 ppm).

$M_p$  145.6-147.1  $^\circ\text{C}$ .

### 2-methyl-2,5,6-triphenyl-1H-indene-1,3(2H)-dione (24)

(off-white solid).

$^1\text{H}$ -NMR ( $\text{CDCl}_3$ , 600 MHz,  $\delta$ ): 8.07 (s, 2H), 7.41-7.39 (m, 2H), 7.34-7.31 (m, 2H), 7.27-7.23 (m, 7H), 7.16-7.14 (m, 4H), 1.76 (s, 3H).

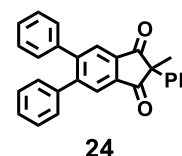

$^{13}\text{C}$ -NMR  $\{^1\text{H}\}$  ( $\text{CDCl}_3$ , 150 MHz,  $\delta$ ): 201.83, 149.19, 140.28, 139.66, 138.07, 129.71, 128.99, 128.44, 128.06, 127.78, 126.88, 125.89, 58.58, 20.26.

FT-IR (dry powder) ( $\text{cm}^{-1}$ ): 3060 (*C-H*), 1707 (*C=O*).

HR-MS ( $m/z$ ):  $[\text{M}+\text{H}]^+$  calcd for  $\text{C}_{22}\text{H}_{22}\text{O}_2$  389.1536; found 389.1534 (0.4 ppm).

$M_p$  195.3-197.2  $^\circ\text{C}$ .

### 5,6-bis(4-methoxyphenyl)-2-methyl-2-phenyl-1H-indene-1,3(2H)-dione (25)

(off-white solid).

$^1\text{H}$ -NMR ( $\text{CDCl}_3$ , 600 MHz,  $\delta$ ): 8.02 (s, 2H), 7.40-7.39 (m, 2H), 7.34-7.31 (m, 2H), 7.27-7.25 (m, 1H), 7.10-7.09 (AA'BB' system, 4H), 6.82-6.80 (AA'BB' system, 4H), 3.80 (s, 6H), 1.75 (s, 3H).

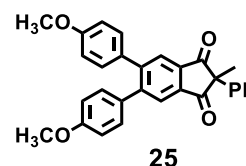

$^{13}\text{C}$ -NMR  $\{^1\text{H}\}$  ( $\text{CDCl}_3$ , 150 MHz,  $\delta$ ): 201.94, 159.51, 148.74, 139.99, 138.21, 132.17, 130.96, 128.96, 127.72, 126.88, 125.72, 114.00, 58.54, 55.39, 20.19.

FT-IR (dry powder) ( $\text{cm}^{-1}$ ): 3059 (*C-H*), 2961 (*C-H*), 1701 (*C=O*).

HR-MS ( $m/z$ ):  $[\text{M}+\text{H}]^+$  calcd for  $\text{C}_{30}\text{H}_{25}\text{O}_4$  449.1747; found 449.1738 (2.0 ppm).

$M_p$  196.2-198.7  $^\circ\text{C}$ .

### 5,6-bis(4-((tert-butyldimethylsilyloxy)phenyl)-2-methyl-2-phenyl-1H-indene-1,3(2H)-dione (26)

(off-white solid).

$^1\text{H}$ -NMR ( $\text{CDCl}_3$ , 600 MHz,  $\delta$ ): 8.02 (s, 2H), 7.40-7.39 (m, 2H), 7.34-7.31 (m, 2H), 7.27-7.25 (m, 1H), 7.02-7.01 (AA'BB' system, 4H), 6.74-6.73 (AA'BB' system, 4H), 1.75 (s, 3H), 0.98 (s, 18H), 0.19 (s, 12H).

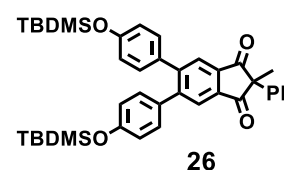

$^{13}\text{C}$ -NMR  $\{^1\text{H}\}$  ( $\text{CDCl}_3$ , 150 MHz,  $\delta$ ): 201.95, 155.80, 148.91, 140.01, 138.23, 132.85, 130.97, 129.65, 128.96, 128.87, 127.72, 126.89, 125.60, 120.18, 58.55, 25.81, 20.20, 18.41, -4.26.

FT-IR (dry powder) ( $\text{cm}^{-1}$ ): 2931 (*C-H*), 2858 (*C-H*), 1703 (*C=O*), 1266 (*Si-O*).

HR-MS ( $m/z$ ):  $[\text{M}+\text{H}]^+$  calcd for  $\text{C}_{40}\text{H}_{49}\text{O}_4\text{Si}_2$  649.3164; found 649.3147 (2.6 ppm).

$M_p$  134.2-136.5  $^\circ\text{C}$ .

**dimethyl 2-isopropyl-2-methyl-1,3-dioxo-2,3-dihydro-1H-indene-5,6-dicarboxylate (27)**

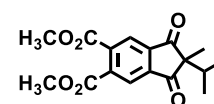

27

(yellow solid).

$^1\text{H}$ -NMR ( $\text{CDCl}_3$ , 600 MHz,  $\delta$ ): 8.25 (s, 2H), 3.96 (s, 6H), 2.16 (h,  $J = 6$  Hz, 1H), 1.27 (s, 3H), 0.91 (d,  $J = 6$  Hz, 6H).

$^{13}\text{C}$ -NMR  $\{^1\text{H}\}$  ( $\text{CDCl}_3$ , 150 MHz,  $\delta$ ): 203.53, 166.45, 142.70, 138.64, 123.94, 57.52, 53.40, 34.67, 18.12, 17.37.

FT-IR (dry powder) ( $\text{cm}^{-1}$ ): 2957 (*C-H*), 2876 (*C-H*), 1729 (*C=O*), 1710 (*C=O*).

HR-MS ( $m/z$ ):  $[\text{M}+\text{H}]^+$  calcd for  $\text{C}_{17}\text{H}_{19}\text{O}_6$  319.1176; found 319.1175 (0.4 ppm).

$M_p$  92.2-94.6  $^\circ\text{C}$ .

**5,6-dimethoxy-2-phenyl-1H-indene-1,3(2H)-dione (29)**

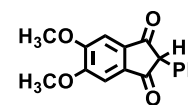

29

(off-white solid).

$^1\text{H}$ -NMR ( $\text{CDCl}_3$ , 600 MHz,  $\delta$ ): 7.40 (s, 2H), 7.34-7.28 (m, 3H), 7.18-7.16 (m, 2H), 4.20 (s, 1H), 4.04 (s, 6H).

$^{13}\text{C}$ -NMR  $\{^1\text{H}\}$  ( $\text{CDCl}_3$ , 150 MHz,  $\delta$ ): 197.45, 156.35, 137.98, 133.94, 129.08, 128.79, 127.86, 103.81, 59.59, 56.90.

FT-IR (dry powder) ( $\text{cm}^{-1}$ ): 3006 (*C-H*), 2946 (*C-H*), 1686 (*C=O*).

HR-MS ( $m/z$ ):  $[\text{M}+\text{H}]^+$  calcd for  $\text{C}_{17}\text{H}_{15}\text{O}_4$  283.0965; found 283.0961 (1.3 ppm).

$M_p$  101.2-103.5  $^\circ\text{C}$ .

**2-octadecyl-2-phenyl-1H-indene-1,3(2H)-dione (30)**

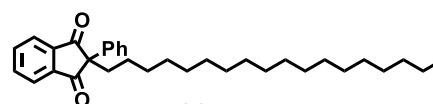

30

(off-white solid).

$^1\text{H}$ -NMR ( $\text{CDCl}_3$ , 600 MHz,  $\delta$ ): 8.03-8.02 (m, 2H), 7.86-

7.85 (m, 2H), 7.42-7.40 (m, 2H), 7.30-7.28 (m, 2H), 7.24-7.22 (m, 1H), 2.25 (t,  $J = 9$  Hz, 2H), 1.30-1.13 (m, 35H), 0.88 (t,  $J = 6$  Hz, 3H).

$^{13}\text{C}$ -NMR  $\{^1\text{H}\}$  ( $\text{CDCl}_3$ , 150 MHz,  $\delta$ ): 202.17, 142.25, 137.41, 136.00, 128.89, 127.70, 126.97, 123.67, 62.48, 36.51, 32.07, 30.13, 29.84, 29.80, 29.76, 29.74, 29.69, 29.62, 29.51, 29.30, 25.38, 22.84, 14.26.

FT-IR (dry powder) ( $\text{cm}^{-1}$ ): 2949 (C-H), 2916 (C-H), 2850 (C-H), 1705 (C=O).

HR-MS ( $m/z$ ):  $[\text{M}+\text{H}]^+$  calcd for  $\text{C}_{33}\text{H}_{47}\text{O}_2$  475.3571; found 475.3557 (2.9 ppm).

$M_p$  63.2-64.3  $^\circ\text{C}$ .

**5,6-dimethoxy-2-methyl-2-phenyl-1H-indene-1,3(2H)-dithione (32)**

(green solid).

$^1\text{H}$ -NMR ( $\text{CDCl}_3$ , 300 MHz,  $\delta$ ): 7.40 (s, 2H), 7.21-7.17 (m, 5H), 4.09 (s, 6H), 1.92 (s, 3H).

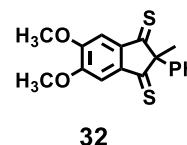

**2-methyl-2-phenyl-1H-cyclopenta[b]naphthalene-1,3(2H)-dithione (33)**

(green solid).

$^1\text{H}$ -NMR ( $\text{CDCl}_3$ , 300 MHz,  $\delta$ ): 8.63 (s, 2H), 8.15-8.12 (m, 2H), 7.72-7.69 (m, 2H), 7.22-7.12 (m, 5H), 2.00 (s, 3H).

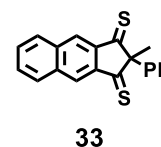

**5,6-dichloro-2-methyl-2-phenyl-1H-indene-1,3(2H)-dithione (34)**

(green solid).

$^1\text{H}$ -NMR ( $\text{CDCl}_3$ , 400 MHz,  $\delta$ ): 8.15 (s, 2H), 7.24-7.15 (m, 5H), 1.91 (s, 3H).

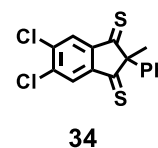

**2-methyl-2,5,6-triphenyl-1H-indene-1,3(2H)-dithione (35)**

(green solid).

$^1\text{H}$ -NMR ( $\text{CDCl}_3$ , 400 MHz,  $\delta$ ): 8.14 (s, 2H), 7.31-7.29 (m, 10H), 7.25-7.22 (m, 5H), 2.01 (s, 3H).

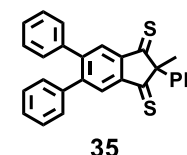

**5,6-bis(4-methoxyphenyl)-2-methyl-2-phenyl-1H-indene-1,3(2H)-dithione (36)**

(green solid).

$^1\text{H}$ -NMR ( $\text{CDCl}_3$ , 400 MHz,  $\delta$ ): 8.05 (s, 2H), 7.28-7.21 (m, 5H), 7.16-7.14 (AA'BB' system, 4H), 6.83-6.80 (AA'BB' system, 4H), 3.81 (s, 6H), 1.96 (s, 3H).

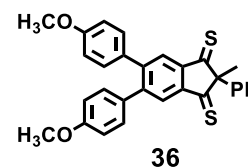



**5,6-bis(4-((tert-butyldimethylsilyl)oxy)phenyl)-2-methyl-2-phenyl-1H-indene-1,3(2H)-dione (37)**

(green solid).

<sup>1</sup>H-NMR (CDCl<sub>3</sub>, 400 MHz, δ): 8.06 (s, 2H), 7.25-7.20 (m, 5H), 7.08-7.06 (AA'BB' system, 4H), 6.75-6.73 (AA'BB' system, 4H), 1.97 (s, 3H), 0.98 (s, 18H), 0.19 (s, 12H).

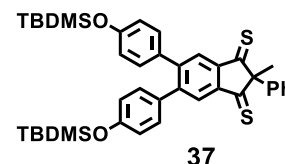

**2-octadecyl-2-phenyl-1H-indene-1,3(2H)-dithione (38)**

Synthesized with general method D. The compound was obtained in a ternary mixture (860 mg) composed by 15%

desired product **38**, 46% starting indanedione **30**, and 39% product of single conversion. This material was used in the next step without further purification, adjusting the amount of 9-diazo9H-fluorenone necessary in the B-K olefination.

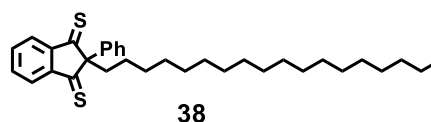

**dimethyl 2-isopropyl-2-methyl-1,3-dioxo-2,3-dihydro-1H-indene-5,6-dicarboxylate (27)**

(green solid).

<sup>1</sup>H-NMR (CDCl<sub>3</sub>, 400 MHz, δ): 8.27 (s, 2H), 3.96 (m, 6H), 2.41 (h, *J* = 7 Hz, 1H), 1.52 (s, 3H), 0.86 (d, *J* = 7 Hz, 6H).

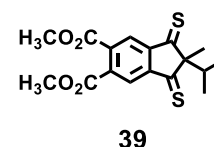

Reference motor **1** was previously reported<sup>S2</sup> and characterized.

**(2)**

(deep red solid).

<sup>1</sup>H-NMR (Cl<sub>2</sub>DCCDCl<sub>2</sub>, 500 MHz, 90 °C, δ) (signals of the main isomer): 8.41 (d, *J* = 6 Hz, 2H), 7.80 (d, *J* = 6 Hz, 2H), 7.72 (d, *J* = 6 Hz, 2H), 7.68 (d, *J* = 6 Hz, 2H), 7.65 (s, 2H), 7.30 (t, *J* = 6 Hz, 3H), 7.27 (t, *J* = 6 Hz, 3H), 7.18 (t, *J* = 6 Hz, 3H), 7.13 (t, *J* = 6 Hz, 3H), 3.86 (s, 6H), 2.44 (s, 3H).

<sup>13</sup>C-NMR {<sup>1</sup>H} (CDCl<sub>3</sub>, 125 MHz, -45 °C, δ): 160.69, 157.25, 154.35, 152.20, 150.17, 149.70, 142.21, 140.95, 140.39, 140.12, 139.58, 139.54, 138.86, 137.61, 137.38, 137.32, 132.95, 130.44, 128.69, 128.60, 127.97, 127.53, 127.28, 127.17, 127.04, 126.83, 126.73, 126.67, 126.58, 126.20, 126.05, 125.77, 123.61, 119.92, 119.60, 119.53, 119.39, 110.67, 105.38, 71.39, 68.75, 56.91, 56.70, 56.57, 23.38, 19.44.

HR-MS (*m/z*): [M+H]<sup>+</sup> calcd for C<sub>44</sub>H<sub>34</sub>O<sub>2</sub> 593.2475; found 593.2461 (2.3 ppm).

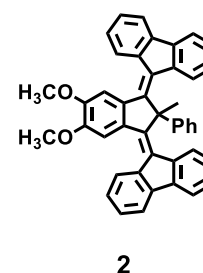

UV-Vis (CH<sub>2</sub>Cl<sub>2</sub>) λ<sub>max</sub>, nm (ε): 247 (149200), 471 (69400).

M<sub>p</sub> 260-262 °C.

Single crystals for XRD were obtained from slow diffusion of hexane (antisolvent) into a saturated solution of 1,2-dichloroethane (solvent).

**(3)**

(orange solid).

<sup>1</sup>H-NMR (Cl<sub>2</sub>DCCDCl<sub>2</sub>, 500 MHz, 90 °C, δ): 8.72 (s, 2H), 8.64 (d, *J* = 6 Hz, 2H), 7.84-7.82 (m, 4H), 7.80-7.78 (m, 2H), 7.71 (d, *J* = 6 Hz, 2H), 7.68-7.67 (m, 2H), 7.57-7.55 (m, 4H), 7.73 (t, *J* = 6 Hz, 3H), 7.29-7.26 (m, 3H), 7.15-7.12 (m, 5H), 2.48 (s, 3H).

<sup>13</sup>C-NMR {<sup>1</sup>H} (CDCl<sub>3</sub>, 125 MHz, -45 °C, δ): 159.46, 156.58, 143.98, 141.81, 141.62, 140.65, 140.18, 140.07, 140.00, 139.57, 139.44, 137.52, 135.59, 134.33, 134.01, 133.55, 133.50, 131.96, 130.87, 129.54, 128.97, 128.86, 128.79, 128.61, 127.96, 127.78, 127.67, 127.51, 127.31, 127.22, 126.54, 126.43, 126.25, 125.21, 125.05, 123.07, 122.87, 119.63, 119.50, 119.41, 118.82, 70.01, 67.63, 20.11, 19.67.

HR-MS (*m/z*): [M+H]<sup>+</sup> calcd for C<sub>46</sub>H<sub>31</sub> 583.2420; found 583.2410 (1.8 ppm).

UV-Vis (CH<sub>2</sub>Cl<sub>2</sub>) λ<sub>max</sub>, nm (ε): 244 (239352), 400 (94064).

M<sub>p</sub> > 300 °C.

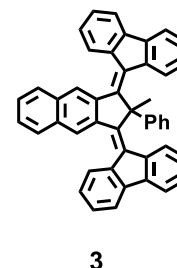

**(4)**

(orange solid).

<sup>1</sup>H-NMR (Cl<sub>2</sub>DCCDCl<sub>2</sub>, 500 MHz, 90 °C, δ) (signals of the main isomer): 8.35 (d, *J* = 6 Hz, 2H), 8.32 (s, 2H), 7.73-7.68 (m, 5H), 7.63 (d, *J* = 6 Hz, 2H), 7.34 (t, *J* = Hz, 3H), 7.26 (t, *J* = 6 Hz, 3H), 7.21 (t, *J* = 6 Hz, 3H), 7.10 (t, *J* = 6 Hz, 3H), 2.42 (s, 3H).

<sup>13</sup>C-NMR {<sup>1</sup>H} (CDCl<sub>3</sub>, 125 MHz, -45 °C, δ): 157.14, 154.41, 154.16, 147.21, 144.65, 140.84, 140.39, 140.26, 140.18, 139.83, 139.65, 138.46, 138.41, 137.13, 135.31, 135.01, 134.41, 133.97, 133.10, 132.71, 130.74, 130.41, 129.64, 128.76, 128.33, 128.16, 128.07, 127.88, 127.74, 127.46, 126.61, 126.44, 125.42, 125.32, 124.40, 123.51, 123.27, 122.81, 120.35, 120.25, 119.80, 119.65, 119.54, 119.05, 70.71, 68.49, 19.70, 18.91.

HR-MS (*m/z*): [M+H]<sup>+</sup> calcd for C<sub>42</sub>H<sub>27</sub>Cl<sub>2</sub> 601.1484; found 601.1481 (0.5 ppm).

UV-Vis (CH<sub>2</sub>Cl<sub>2</sub>) λ<sub>max</sub>, nm (ε): 241 (156766), 441 (59518).

M<sub>p</sub> 269-271 °C.

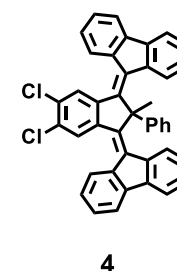

Single crystals for XRD were obtained from slow diffusion of hexane (antisolvent) into a saturated solution of 1,2-dichloroethane (solvent).

**(5)**

(red solid).

$^1\text{H-NMR}$  ( $\text{CDCl}_3$ , 500 MHz, 90 °C,  $\delta$ ) (signals of the main isomer): 8.63 (d,  $J = 6$  Hz, 2H), 8.30 (s, 2H), 7.80 (d,  $J = 6$  Hz, 3H), 7.69-7.64 (m, 6H), 7.31-7.11 (m, 20H), 2.50 (s, 3H).

$^{13}\text{C-NMR}$  ( $\text{CDCl}_3$ , 125 MHz, -45 °C,  $\delta$ ): 159.78, 156.61, 147.01, 144.58, 141.53, 141.29, 140.53, 140.25, 140.07, 140.00, 139.97, 139.79, 139.58, 139.15, 137.51, 135.63, 133.19, 132.73, 131.90, 131.40, 129.81, 129.76, 129.31, 128.88, 128.68, 128.50, 128.29, 127.99, 127.74, 127.64, 127.57, 127.51, 127.26, 127.05, 126.90, 126.65, 126.35, 126.26, 126.14, 125.10, 123.67, 123.34, 119.57, 119.40, 118.91, 70.73, 68.57, 19.88, 19.42.

HR-MS ( $m/z$ ):  $[\text{M}+\text{H}]^+$  calcd for  $\text{C}_{54}\text{H}_{37}$  685.2890; found 685.2881 (1.3 ppm).

UV-Vis ( $\text{CH}_2\text{Cl}_2$ )  $\lambda_{\text{max}}$ , nm ( $\epsilon$ ): 246 (209192), 391 (63390), 449 (86394).

$M_p > 300$  °C.

Single crystals for XRD were obtained from slow diffusion of hexane (antisolvent) into a saturated solution of 1,2-dichloroethane (solvent).

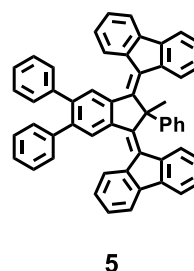

**(6)**

(red solid).

$^1\text{H-NMR}$  ( $\text{CDCl}_3$ , 500 MHz, 90 °C,  $\delta$ ) (signals of the main isomer): 8.62 (d,  $J = 6$  Hz, 2H), 8.25 (s, 2H), 7.79 (d,  $J = 6$  Hz, 2H), 7.68 (d,  $J = 6$  Hz, 2H), 7.64 (d,  $J = 6$  Hz, 2H), 7.29 (t,  $J = \text{Hz}$ , 3H), 7.25 (t,  $J = 6$  Hz, 3H), 7.18 (t,  $J = 6$  Hz, 3H), 7.15 (d,  $J = 6$  Hz, 4H), 7.12 (t,  $J = 6$  Hz, 3H), 6.80 (d,  $J = 6$  Hz, 4H), 3.82 (s, 6H), 2.49 (s, 3H).

$^{13}\text{C-NMR}$  ( $\text{CDCl}_3$ , 125 MHz, -45 °C,  $\delta$ ): 160.05, 158.10, 158.00, 156.86, 146.64, 144.25, 141.39, 141.05, 140.82, 140.60, 139.90, 139.72, 139.51, 139.21, 137.53, 135.65, 132.82, 132.75, 132.57, 132.38, 131.70, 130.97, 130.90, 130.54, 128.66, 127.62, 127.40, 127.21, 126.68, 126.30, 126.22, 125.06, 123.67, 123.33, 119.54, 119.37, 113.18, 70.64, 68.49, 55.29, 19.85, 19.47.

HR-MS ( $m/z$ ):  $[\text{M}+\text{H}]^+$  calcd for  $\text{C}_{56}\text{H}_{41}\text{O}_2$  745.3101; found 745.3088 (1.7 ppm).

UV-Vis ( $\text{CH}_2\text{Cl}_2$ )  $\lambda_{\text{max}}$ , nm ( $\epsilon$ ): 244 (206000), 395 (69400), 450 (84200).

$M_p$  268-270 °C.

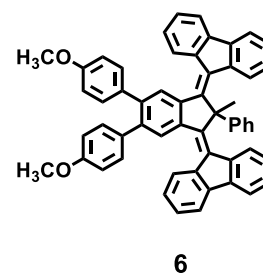

(7)

(red solid).

$^1\text{H-NMR}$  ( $\text{Cl}_2\text{DCCDCl}_2$ , 500 MHz, 90 °C,  $\delta$ ) (signals of the main isomer): 8.62 (d,  $J = 6$  Hz, 2H), 8.26 (s, 2H), 7.79 (d,  $J = 6$  Hz, 2H), 7.68 (d,  $J = 6$  Hz, 2H), 7.65 (d,  $J = 6$  Hz, 2H), 7.30 (t,  $J = \text{Hz}$ , 3H), 7.25 (t,  $J = 6$  Hz, 3H), 7.18 (t,  $J = 6$  Hz, 3H), 7.12 (t,  $J = 6$  Hz, 3H),

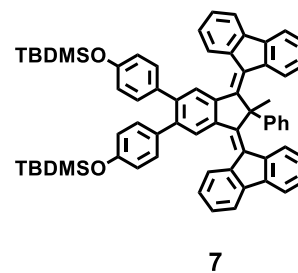

7.09 (d,  $J = 6$  Hz, 4H), , 6.72 (d,  $J = 6$  Hz, 4H), 2.49 (s, 3H), 1.03 (s, 18 H), 0.23 (s, 12H).

$^{13}\text{C-NMR}$   $\{^1\text{H}\}$  ( $\text{CDCl}_3$ , 125 MHz, -45 °C,  $\delta$ ): 160.11, 156.93, 154.44, 154.31, 146.64, 144.21, 141.33, 141.09, 140.65, 139.93, 139.87, 139.72, 139.47, 139.25, 137.55, 135.65, 133.48, 133.32, 132.79, 132.35, 131.54, 130.99, 130.91, 128.66, 127.56, 127.39, 127.21, 126.65, 126.22, 123.36, 119.71, 119.53, 119.36, 70.72, 68.55, 29.89, 25.60, 19.85, 19.56, 18.24, -4.41.

HR-MS ( $m/z$ ):  $[\text{M}+\text{H}]^+$  calcd for  $\text{C}_{66}\text{H}_{65}\text{O}_2\text{Si}_2$  945.4518; found 945.4505 (1.4 ppm).

UV-Vis ( $\text{CH}_2\text{Cl}_2$ )  $\lambda_{\text{max}}$ , nm ( $\epsilon$ ): 246 (178420), 396 (59400), 451 (72400).

$M_p$  248-251.6 °C.

(8)

(orange solid).

$^1\text{H-NMR}$  ( $\text{CDCl}_3$ , 500 MHz, -45 °C,  $\delta$ ): 8.45 (d,  $J = 8.0$  Hz, 2H), 8.24-8.22 (m, 2H), 7.75 (d,  $J = 8.0$  Hz, 2H), 7.71-7.67 (m, 4H), 7.39-7.25 (m, 11H), 7.15 (t,  $J = 8$  Hz, 2H), 7.19 (t,  $J = 8$  Hz, 2H), 3.04 (m, 2H), 1.23 (m, 20H), 1.01 (m,

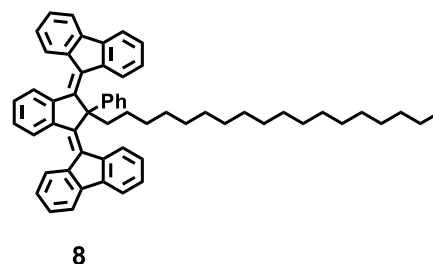

2H), 0.87 (m, 5H), 0.74 (m, 2H), 0.67 (m, 2H), 0.56 (m, 2H), 0.44 (m, 2H), 0.34 (m, 2H).

$^{13}\text{C-NMR}$   $\{^1\text{H}\}$  ( $\text{CDCl}_3$ , 125 MHz, -45 °C,  $\delta$ ): 155.08, 148.67, 141.04, 140.01, 139.78, 138.83, 137.38, 133.29, 130.46, 129.14, 128.49, 127.53, 127.45, 127.36, 126.79, 126.09, 126.00, 123.55, 119.38, 119.30, 72.06, 32.06, 30.72, 29.95, 29.93, 29.88, 29.85, 29.65, 29.62, 29.54, 29.02, 28.92, 27.87, 24.74, 22.91, 14.51.

HR-MS ( $m/z$ ):  $[\text{M}+\text{H}]^+$  calcd for  $\text{C}_{59}\text{H}_{63}$  771.4924; found 771.4913 (1.5 ppm).

UV-Vis ( $\text{CH}_2\text{Cl}_2$ )  $\lambda_{\text{max}}$ , nm ( $\epsilon$ ): 241 (105922), 453 (40224).

$M_p$  194.2-196.6 °C.

(9)

(orange solid).

$^1\text{H-NMR}$  ( $\text{CDCl}_3$ , 600 MHz, 25 °C,  $\delta$ ): 8.44 (s, 2H), 8.20 (d,  $J = 6$  Hz, 2H), 8.01 (d,  $J = 6$  Hz, 2H), 7.77 (d,  $J = 6$  Hz, 2H), 7.73 (d,  $J = 6$  Hz, 2H), 7.39 (t,  $J = 6$  Hz, 2H), 7.34-7.30 (m, 6H), 7.13 (t,  $J = 6$  Hz, 2H), 3.89 (s, 6H), 3.01 (h,  $J = 6$  Hz, 1H), 2.39 (s, 3H), 1.07 (d,  $J = 6$  Hz, 6H). [HMPA present in the

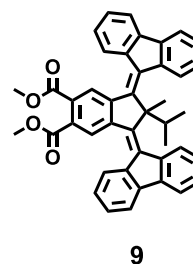

sample due to a strong interaction with the compound; the doublet at 2.65 in the  $^1\text{H-NMR}$  spectrum belongs to HMPA]

$^{13}\text{C-NMR}$   $\{^1\text{H}\}$  ( $\text{CDCl}_3$ , 125 MHz, -45 °C,  $\delta$ ): 167.84, 155.82, 150.23, 145.21, 140.95, 139.72, 139.60, 138.08, 136.10, 134.32, 131.15, 129.09, 128.94, 128.30, 128.17, 127.82, 127.35, 126.72, 126.36, 125.18, 123.53, 120.05, 119.74, 119.63, 75.05, 69.98, 53.35, 39.88, 28.84, 24.17.

HR-MS ( $m/z$ ):  $[\text{M}+\text{H}]^+$  calcd for  $\text{C}_{43}\text{H}_{35}\text{O}_4$  615.2530; found 615.2517 (2.0 ppm).

UV-Vis ( $\text{CH}_2\text{Cl}_2$ )  $\lambda_{\text{max}}$ , nm ( $\epsilon$ ): 238 (196366), 374 (49228), 440 (65830).

$M_p > 300$  °C.

# $^1\text{H}$ and $^{13}\text{C}$ NMR spectra

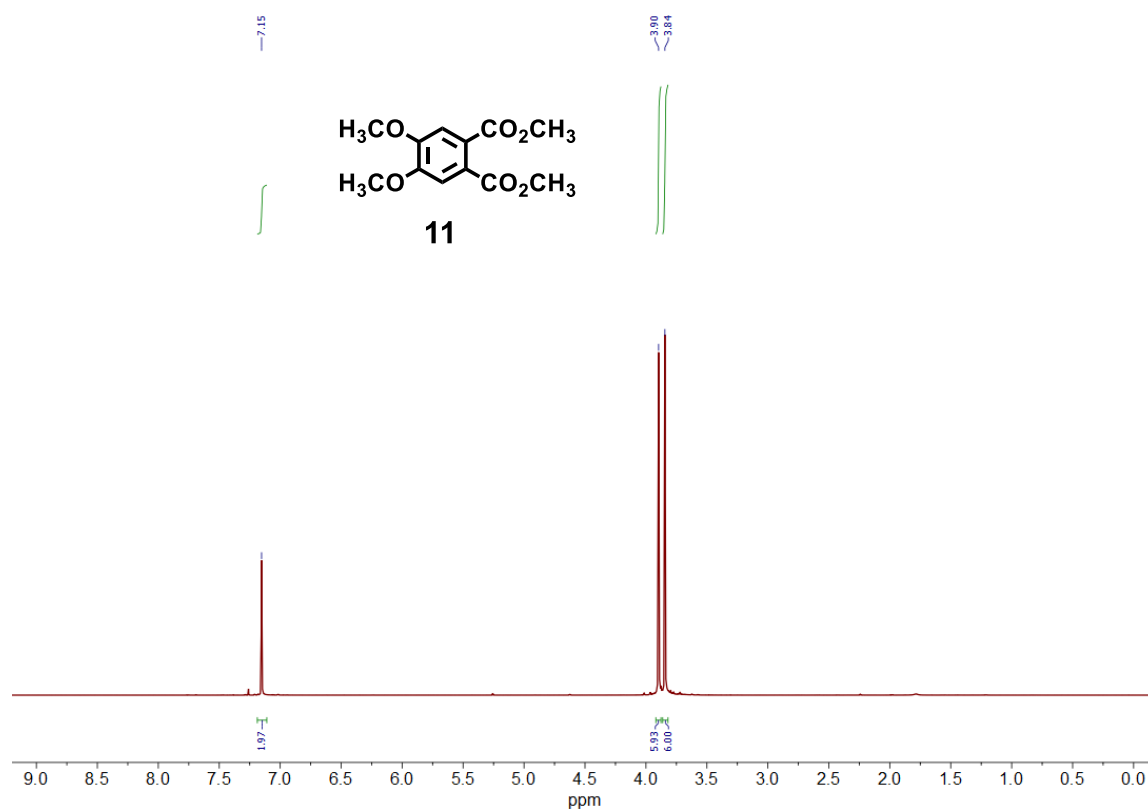

Figure S1.  $^1\text{H}$  NMR spectrum (600 MHz,  $\text{CDCl}_3$ , 25 °C) of 11.

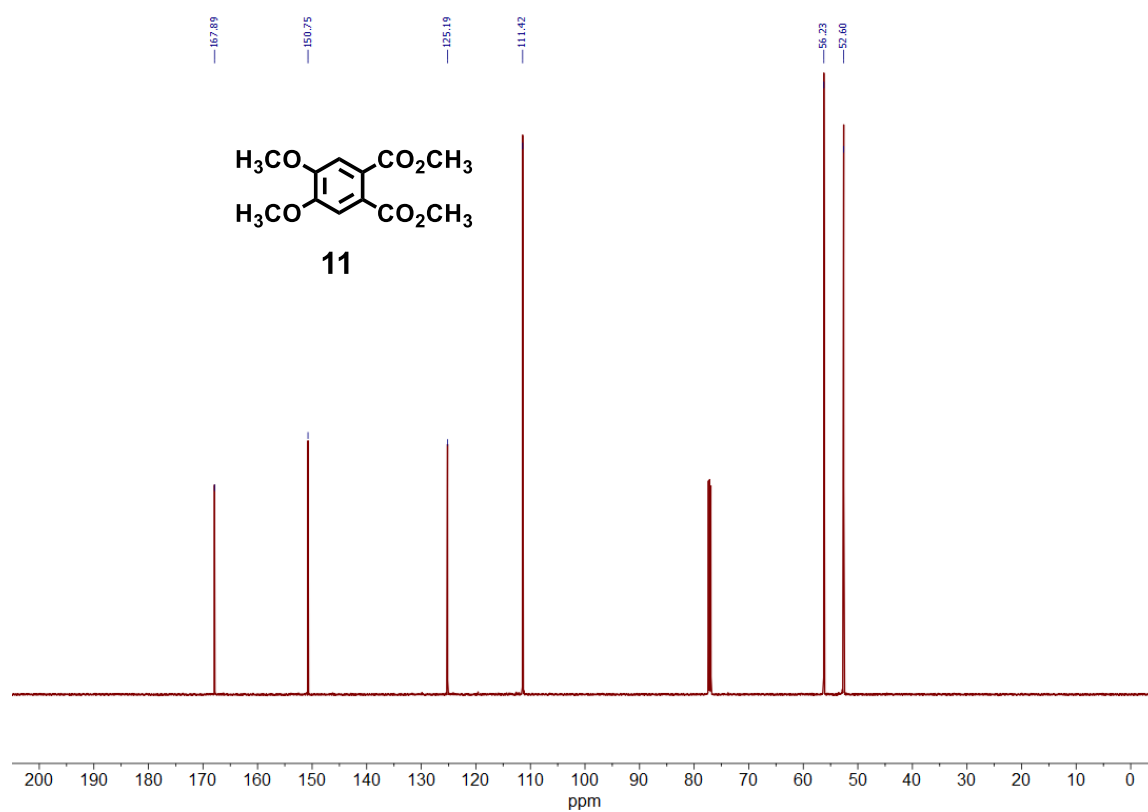

Figure S2.  $^{13}\text{C}$  NMR spectrum (150 MHz,  $\text{CDCl}_3$ , 25 °C) of 11.

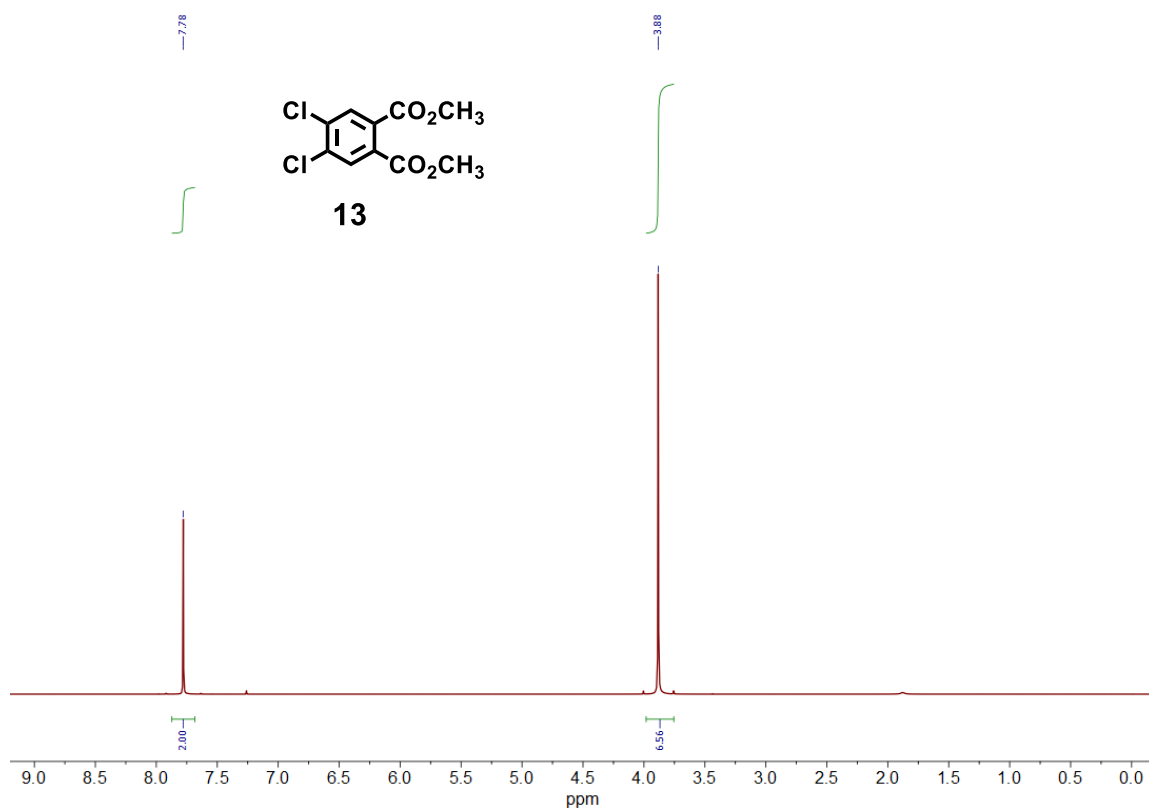

Figure S3.  $^1\text{H}$  NMR spectrum (600 MHz,  $\text{CDCl}_3$ , 25 °C) of 13.

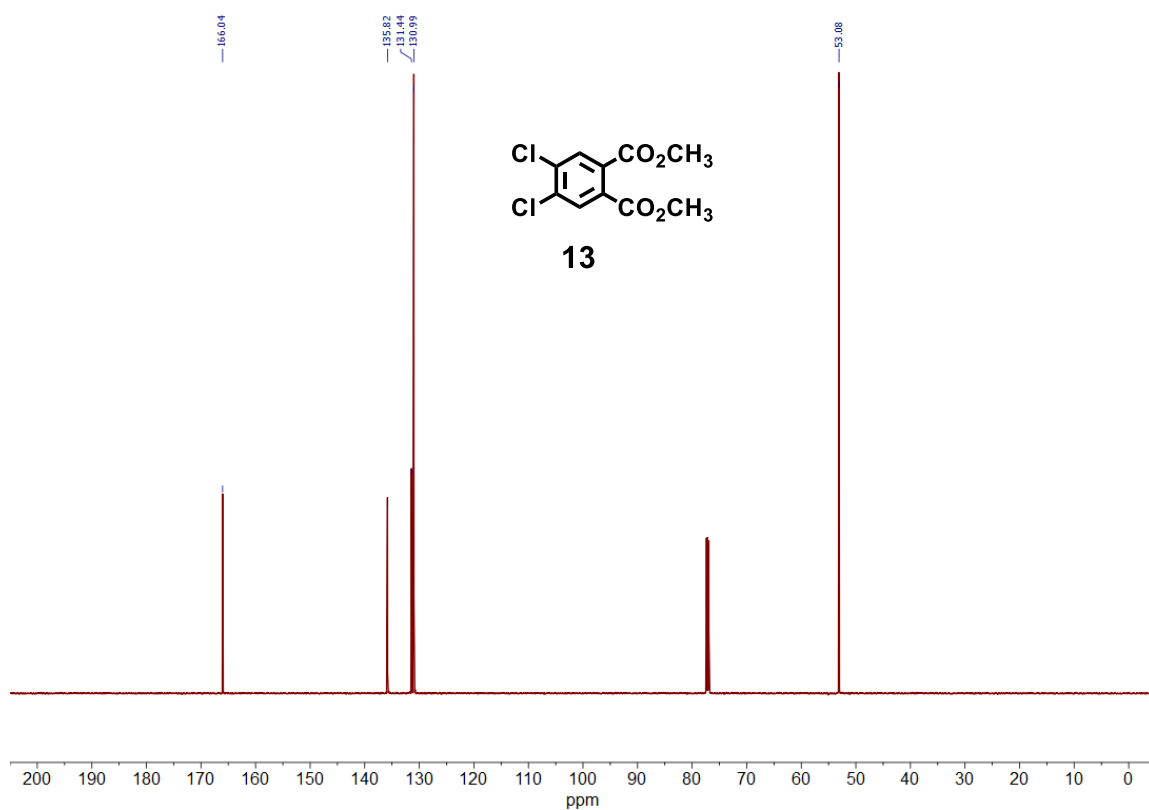

Figure S4.  $^{13}\text{C}$  NMR spectrum (150 MHz,  $\text{CDCl}_3$ , 25 °C) of 13.

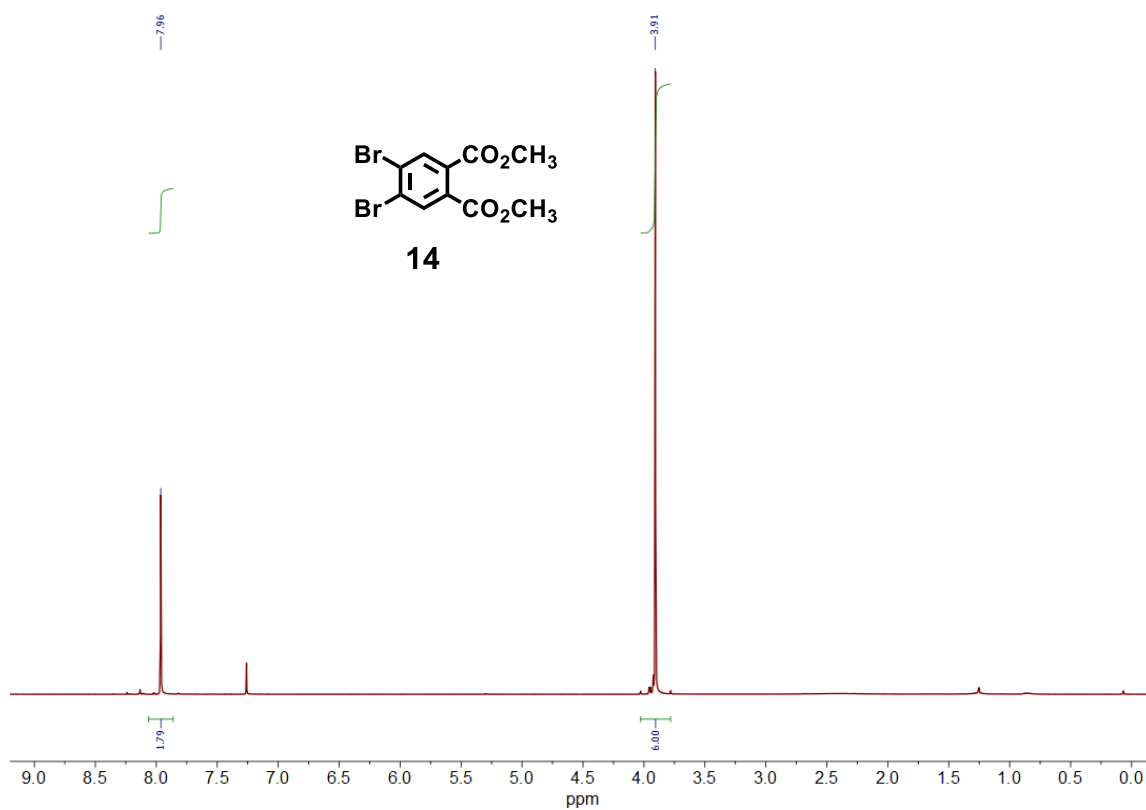

Figure S5.  $^1\text{H}$  NMR spectrum (600 MHz,  $\text{CDCl}_3$ , 25 °C) of 14.

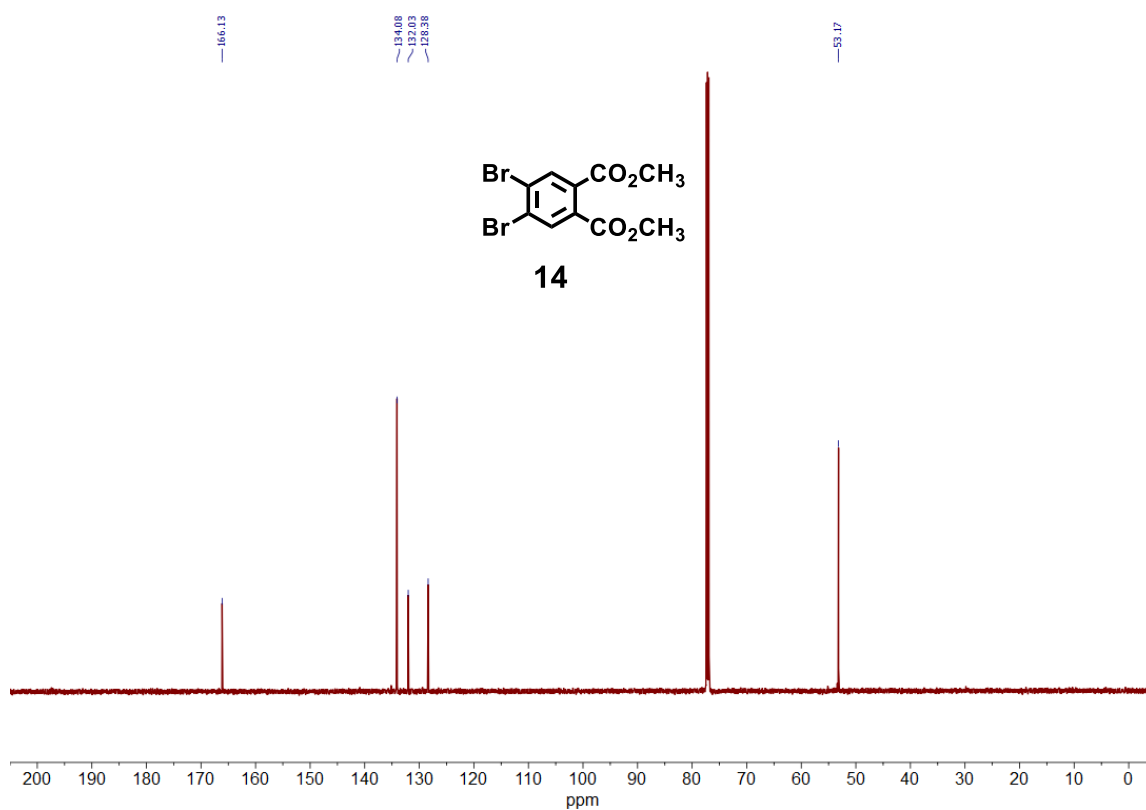

Figure S6.  $^{13}\text{C}$  NMR spectrum (150 MHz,  $\text{CDCl}_3$ , 25 °C) of 14.



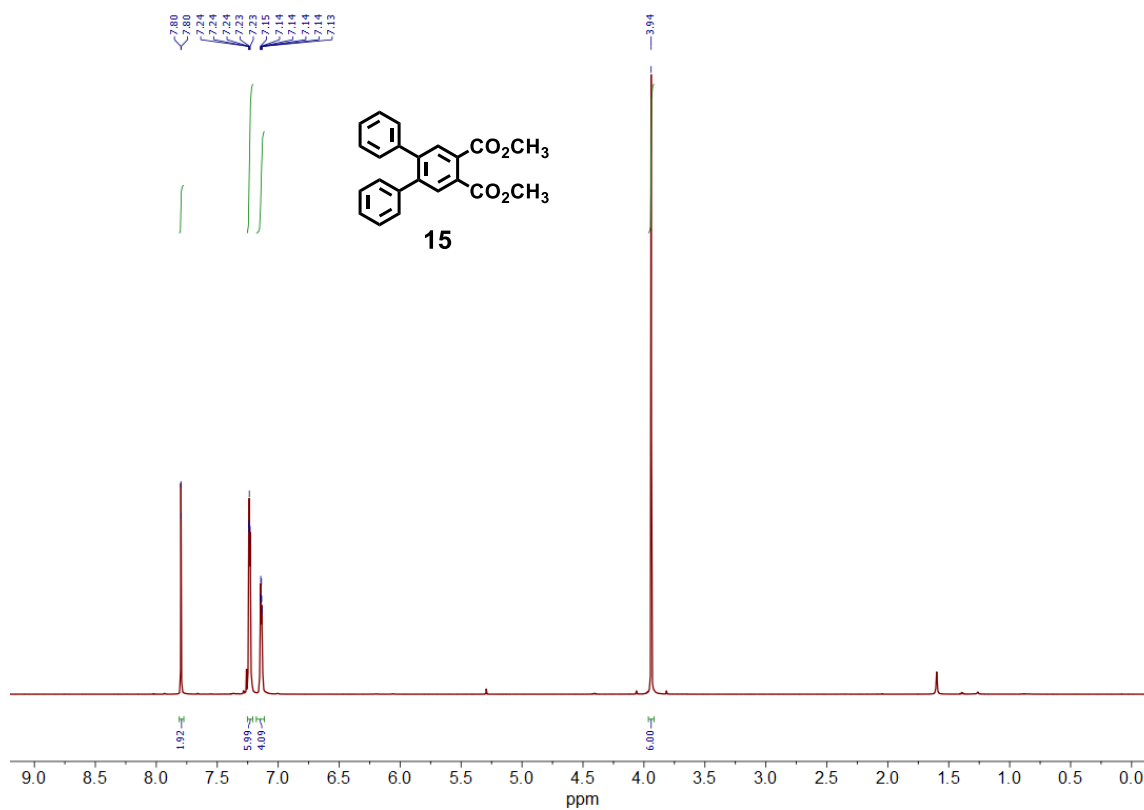

Figure S7. <sup>1</sup>H NMR spectrum (600 MHz, CDCl<sub>3</sub>, 25 °C) of **15**.

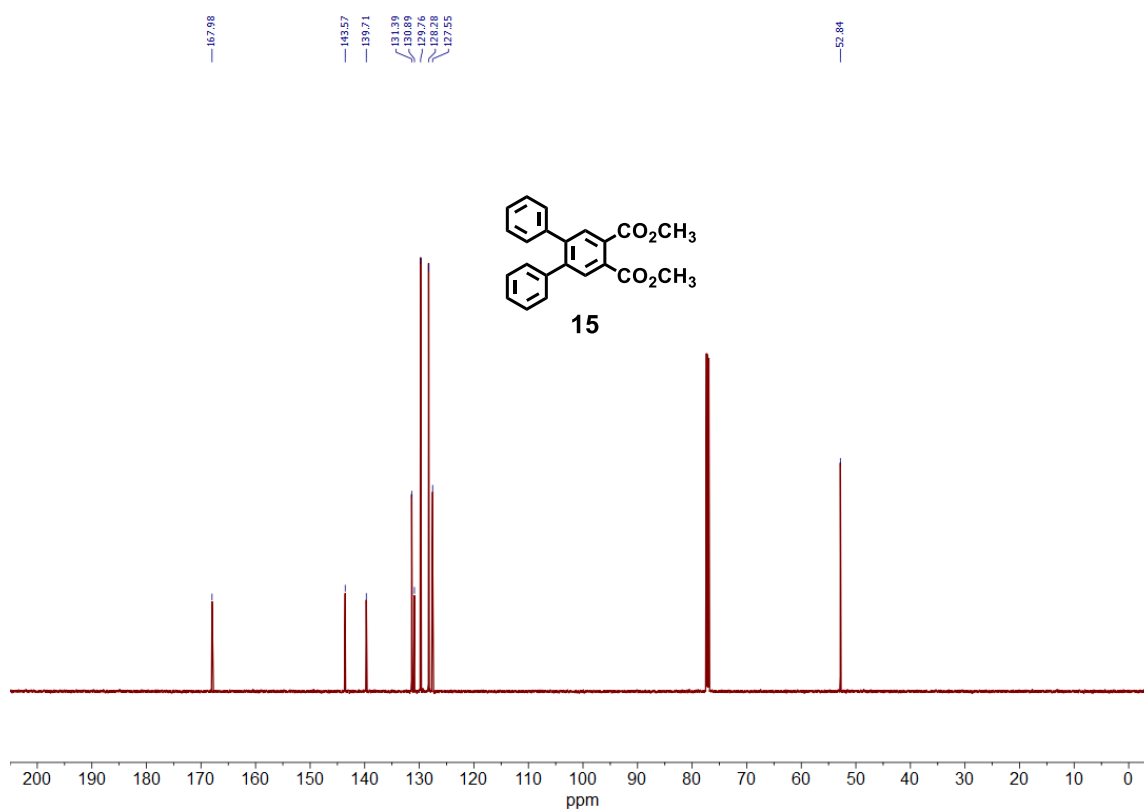

Figure S8. <sup>13</sup>C NMR spectrum (150 MHz, CDCl<sub>3</sub>, 25 °C) of **15**.

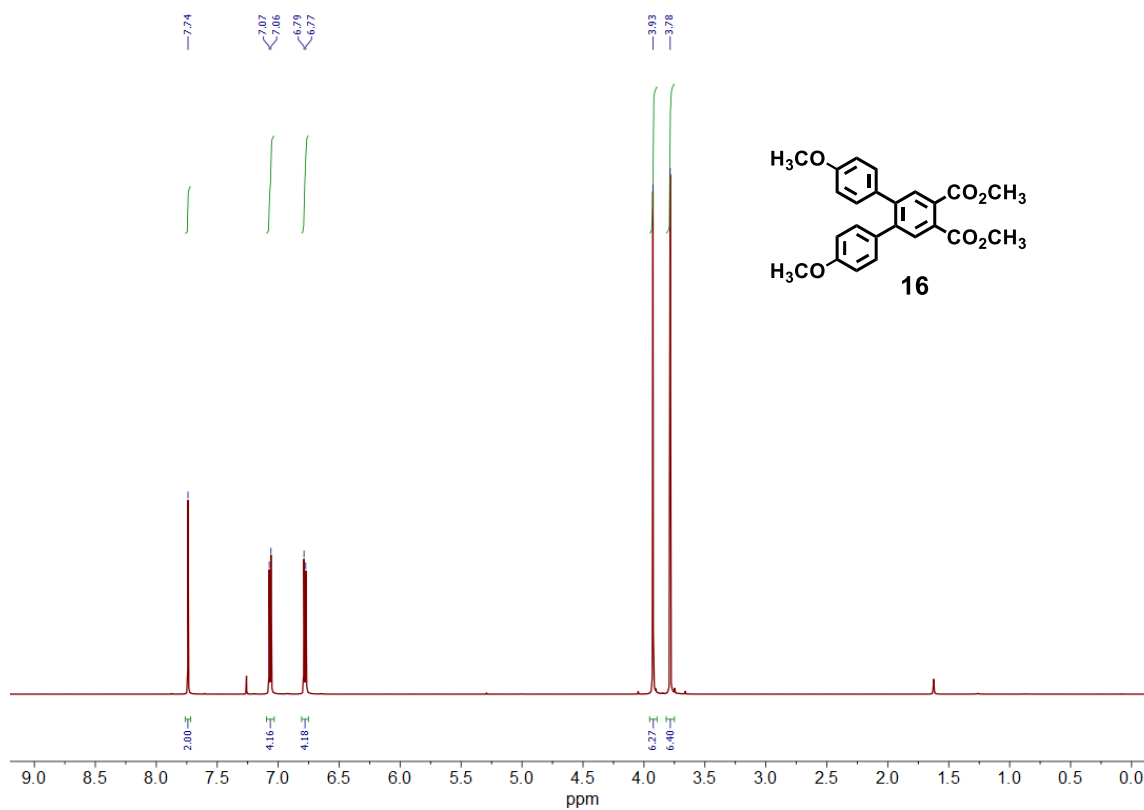

Figure S9. <sup>1</sup>H NMR spectrum (600 MHz, CDCl<sub>3</sub>, 25 °C) of 16.

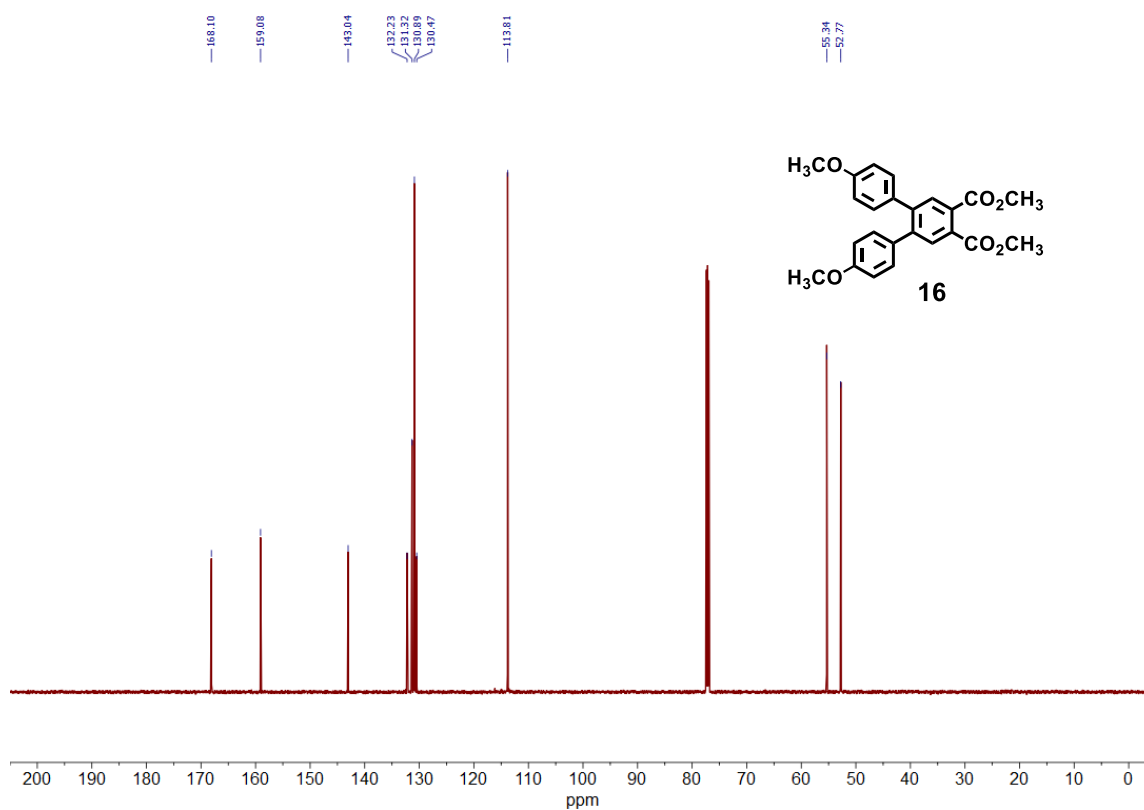

Figure S10. <sup>13</sup>C NMR spectrum (150 MHz, CDCl<sub>3</sub>, 25 °C) of 16.

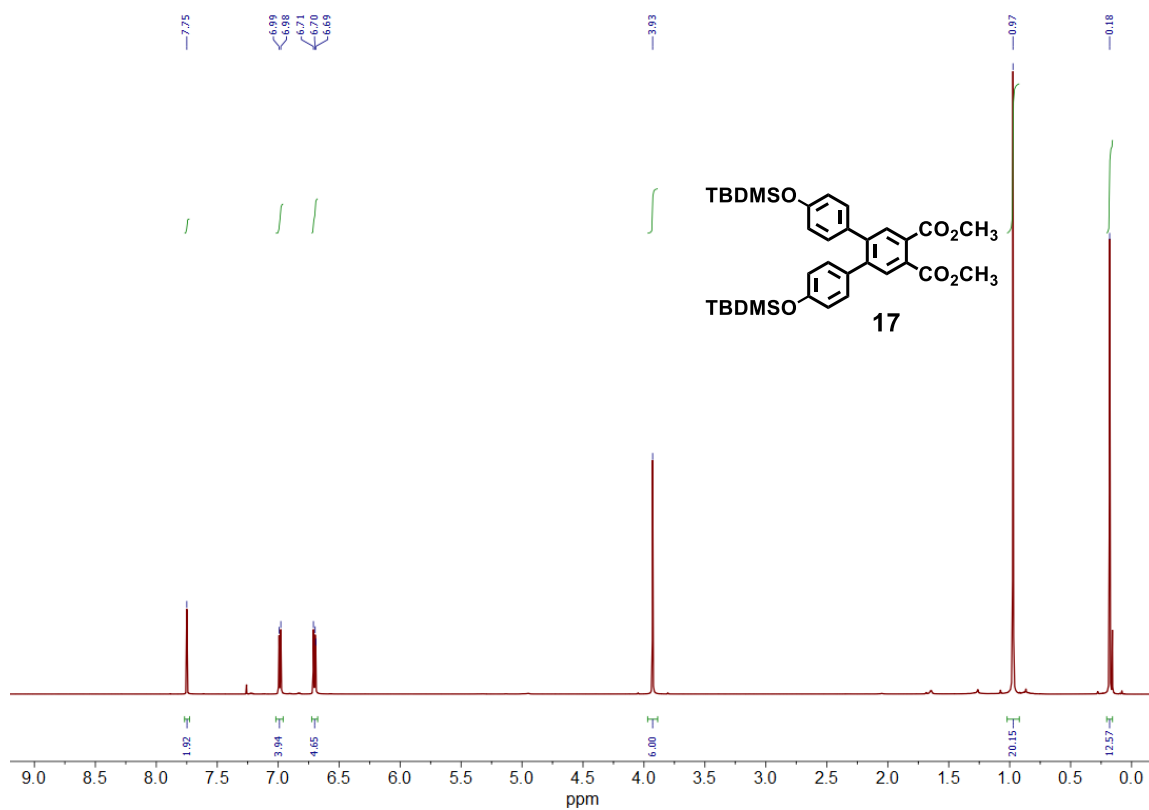

Figure S11. <sup>1</sup>H NMR spectrum (600 MHz, CDCl<sub>3</sub>, 25 °C) of 17.

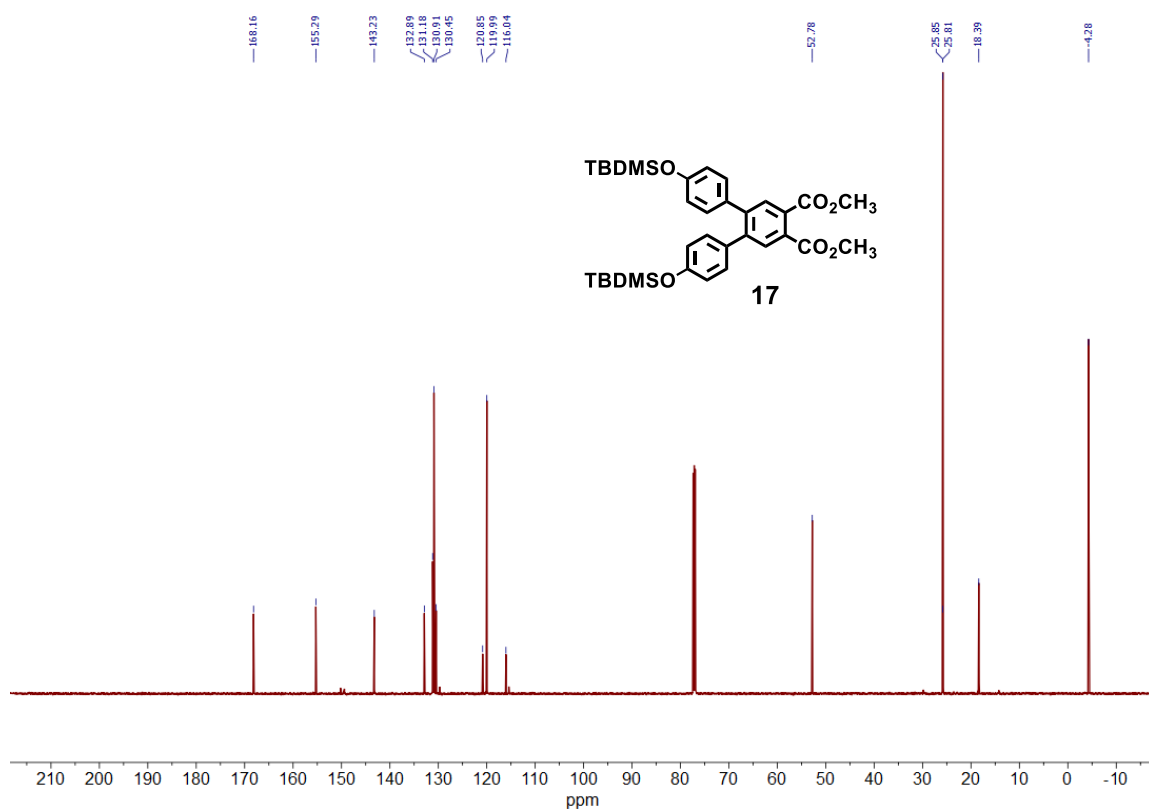

Figure S12. <sup>13</sup>C NMR spectrum (150 MHz, CDCl<sub>3</sub>, 25 °C) of 17.

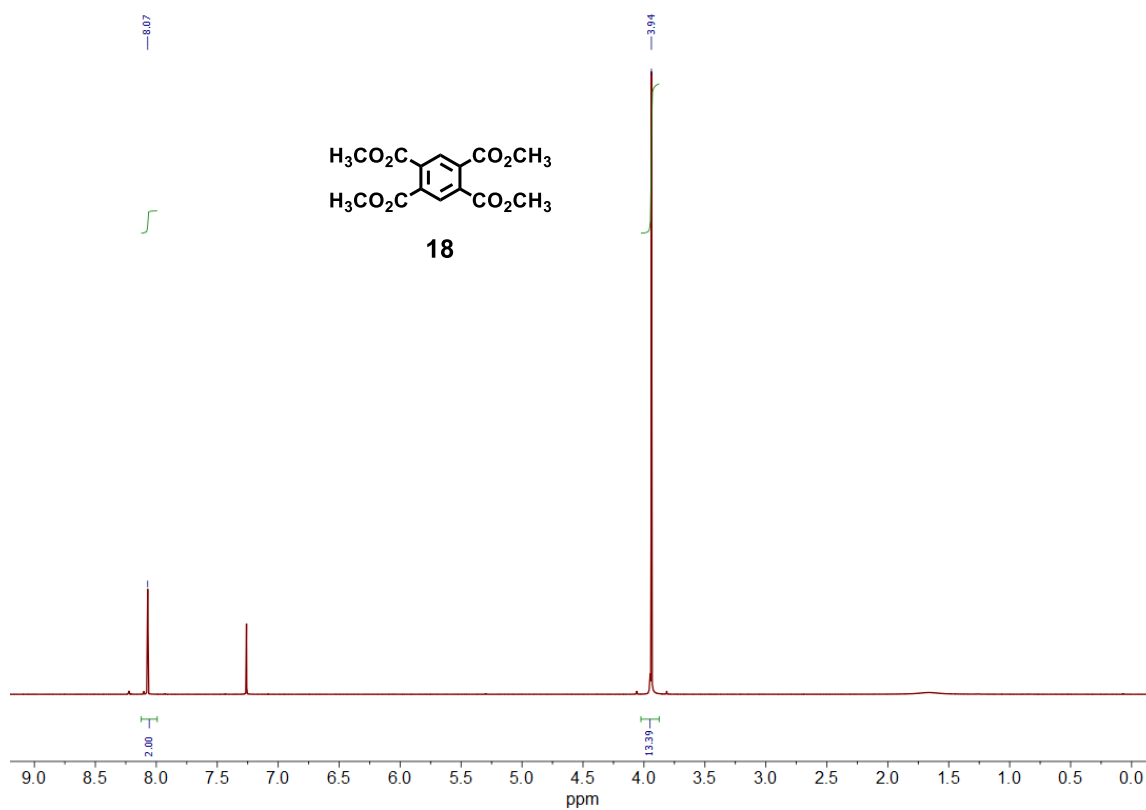

Figure S13. <sup>1</sup>H NMR spectrum (600 MHz, CDCl<sub>3</sub>, 25 °C) of 18.

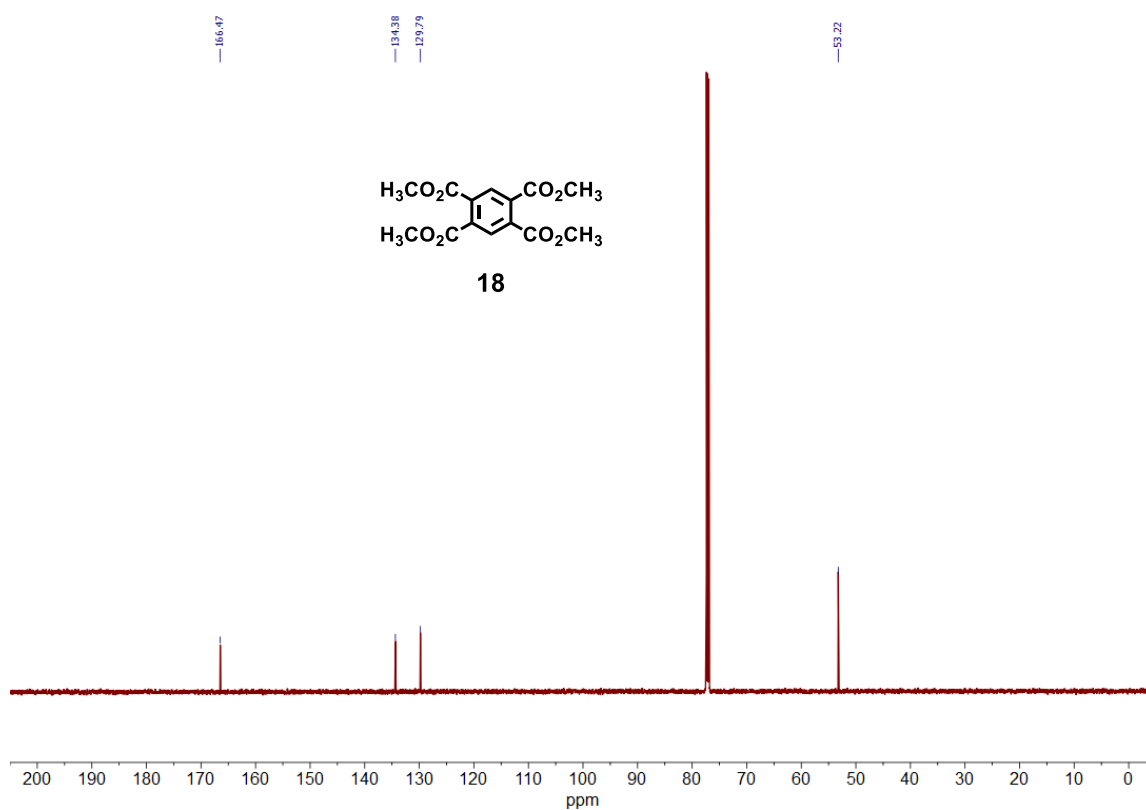

Figure S14. <sup>13</sup>C NMR spectrum (150 MHz, CDCl<sub>3</sub>, 25 °C) of 18.

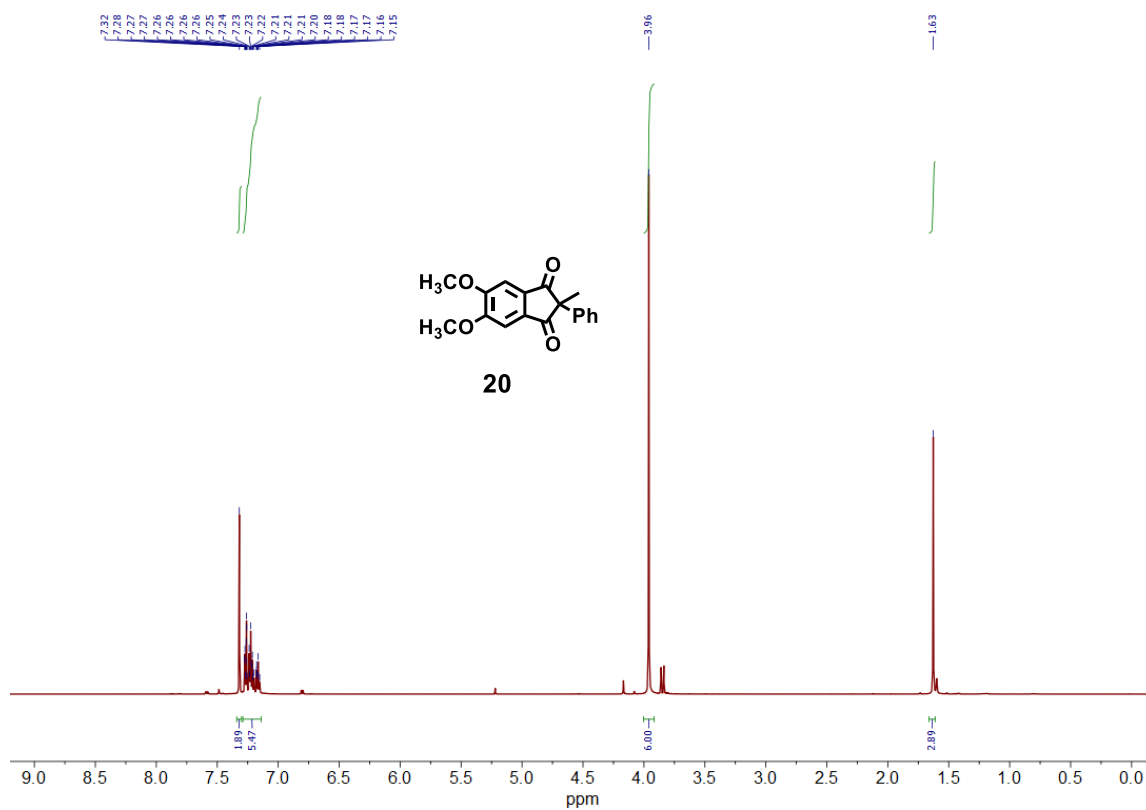

Figure S15. <sup>1</sup>H NMR spectrum (600 MHz, CDCl<sub>3</sub>, 25 °C) of **20**.

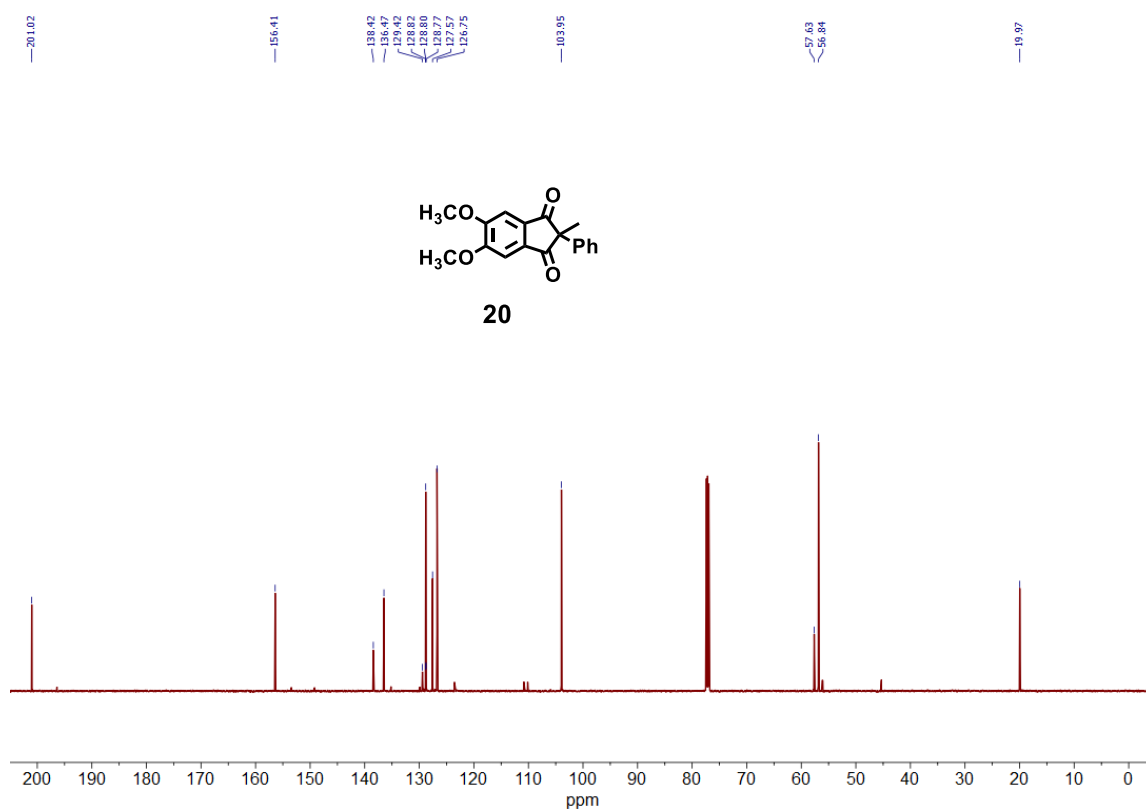

Figure S16. <sup>13</sup>C NMR spectrum (150 MHz, CDCl<sub>3</sub>, 25 °C) of **20**.

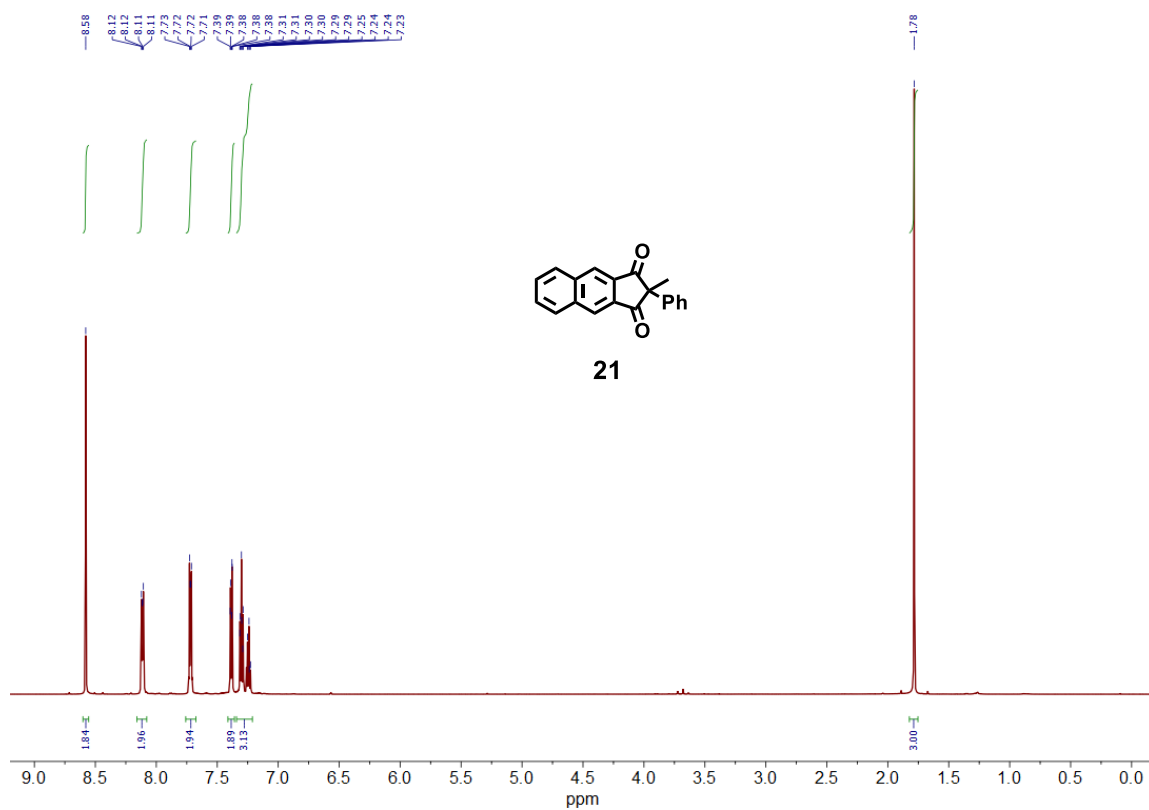

Figure S17. <sup>1</sup>H NMR spectrum (600 MHz, CDCl<sub>3</sub>, 25 °C) of 21.

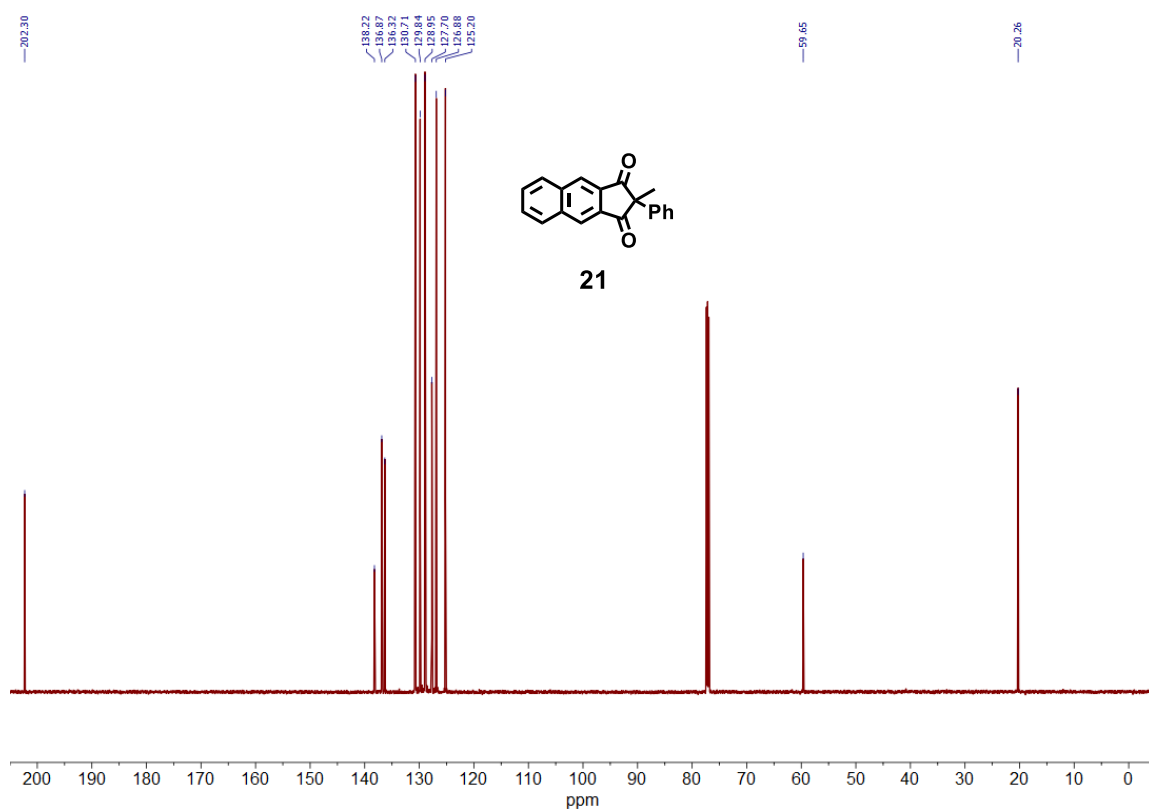

Figure S18. <sup>13</sup>C NMR spectrum (150 MHz, CDCl<sub>3</sub>, 25 °C) of 21.

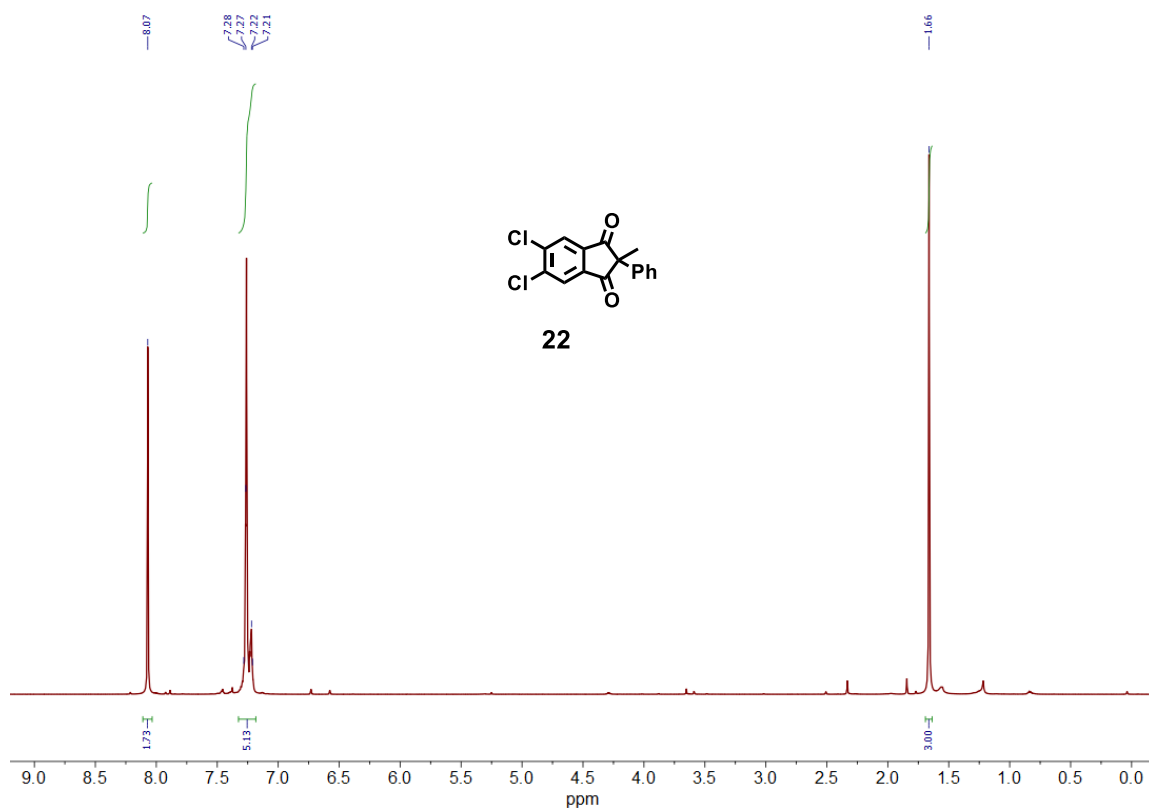

Figure S19.  $^1\text{H}$  NMR spectrum (600 MHz,  $\text{CDCl}_3$ , 25 °C) of 22.

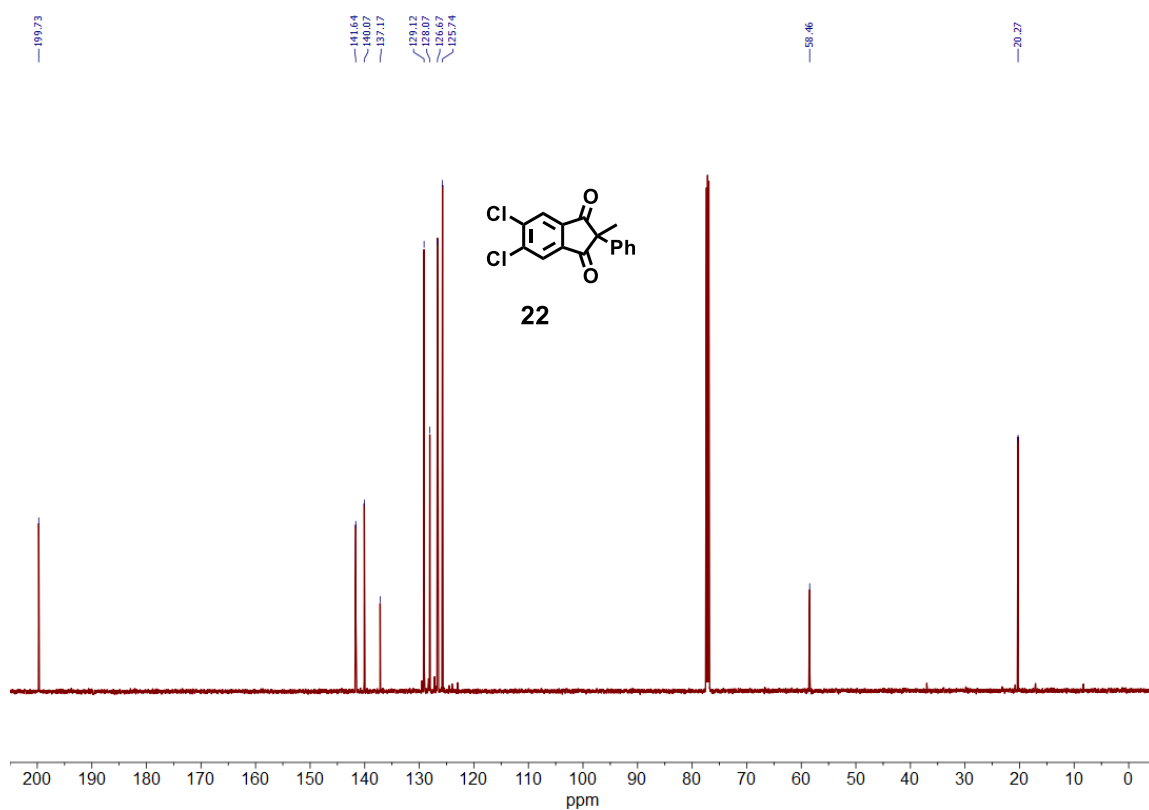

Figure S20.  $^{13}\text{C}$  NMR spectrum (150 MHz,  $\text{CDCl}_3$ , 25 °C) of 22.

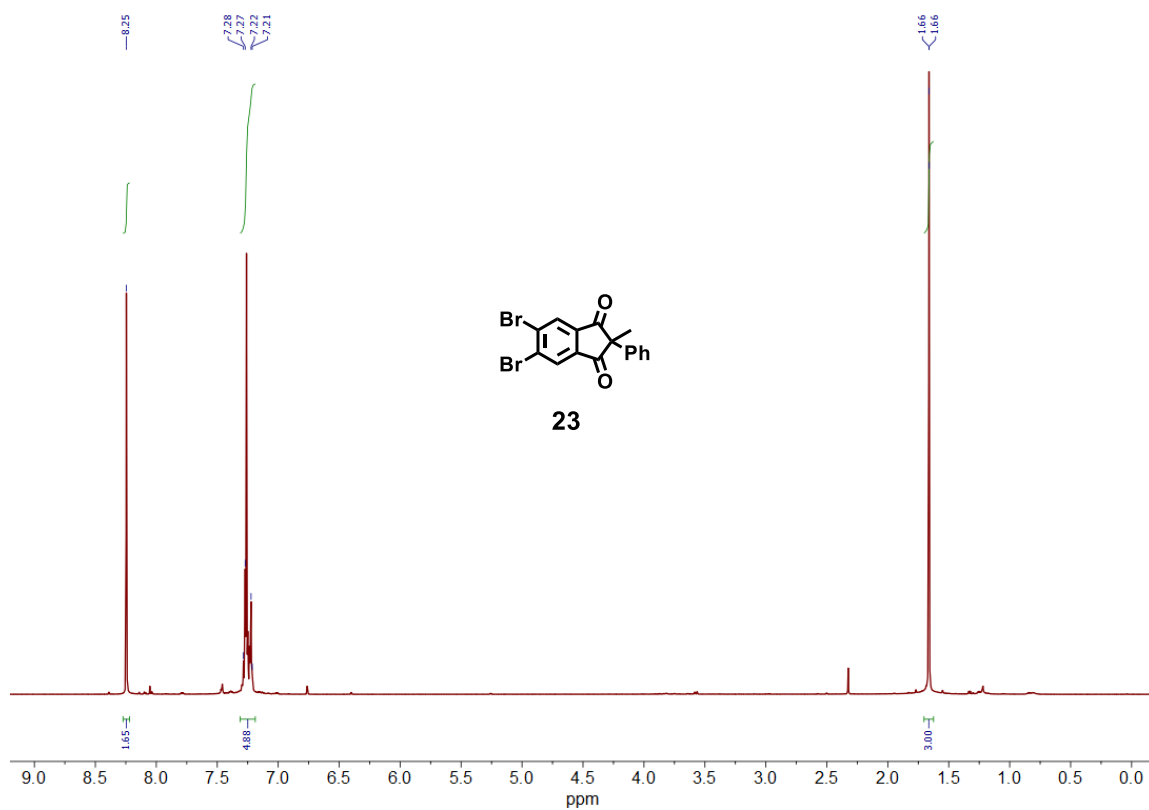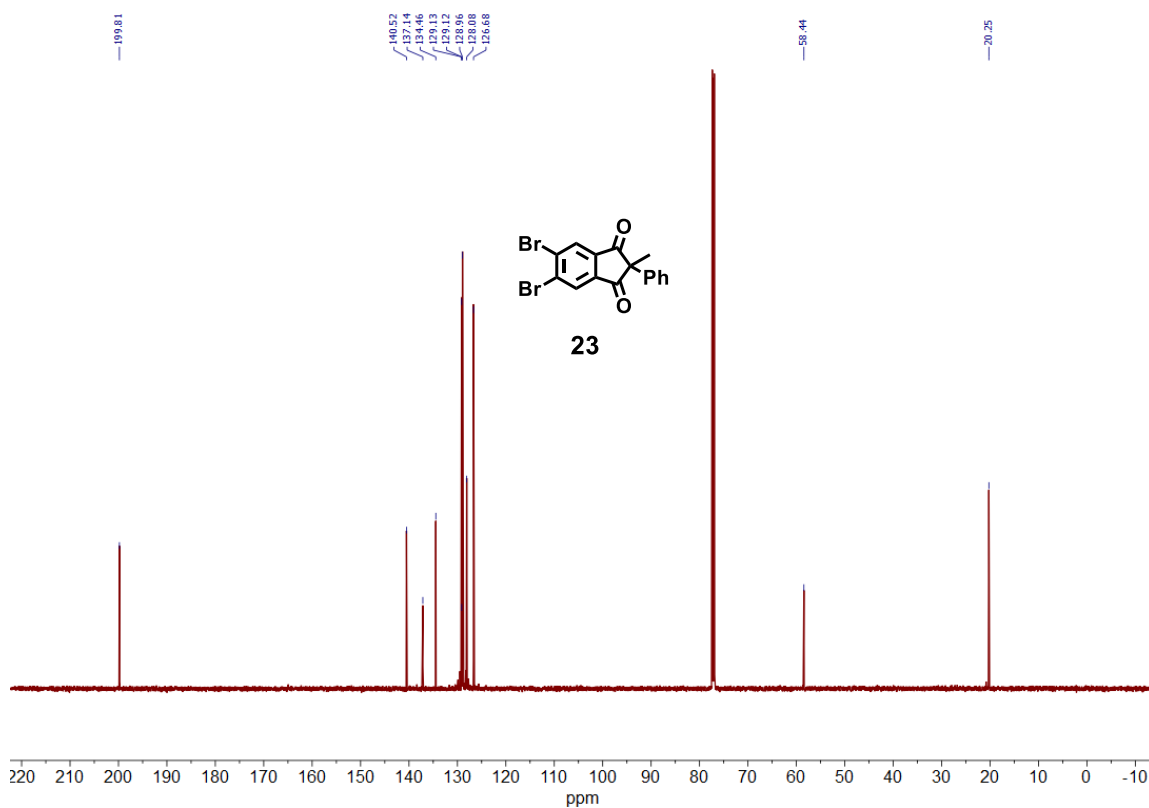



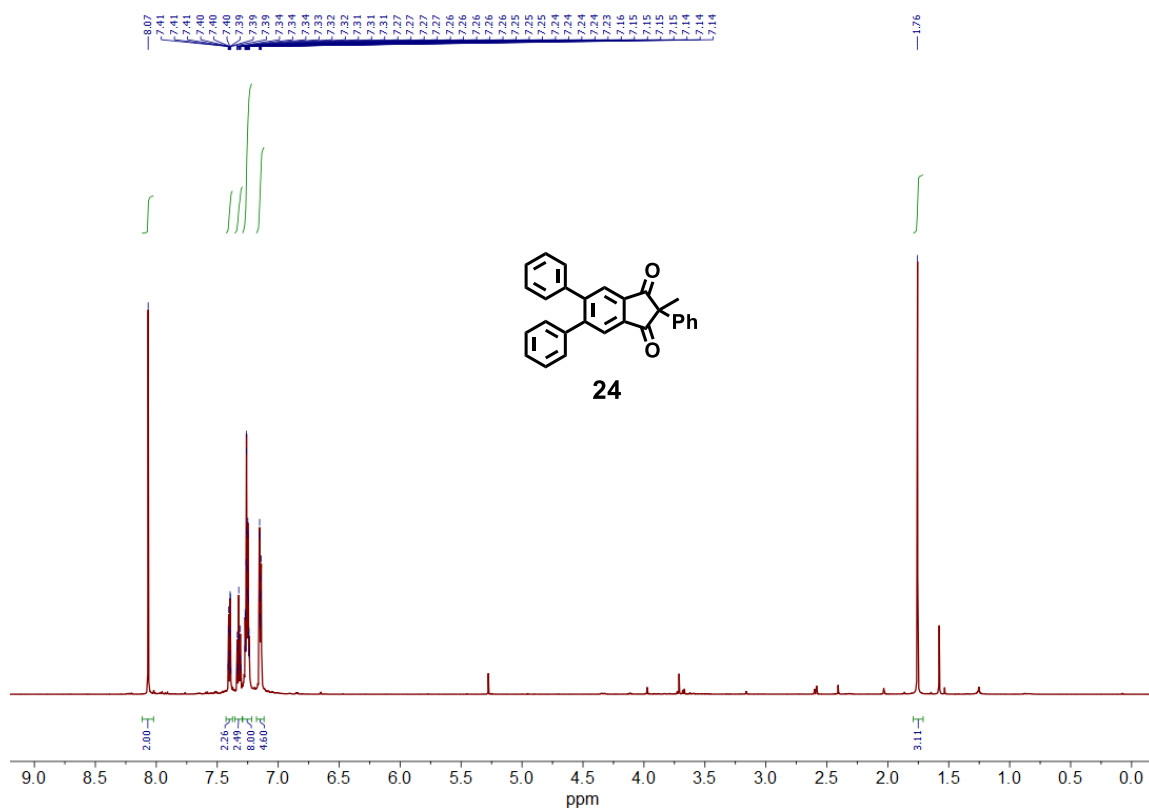

Figure S23. <sup>1</sup>H NMR spectrum (600 MHz, CDCl<sub>3</sub>, 25 °C) of 24.

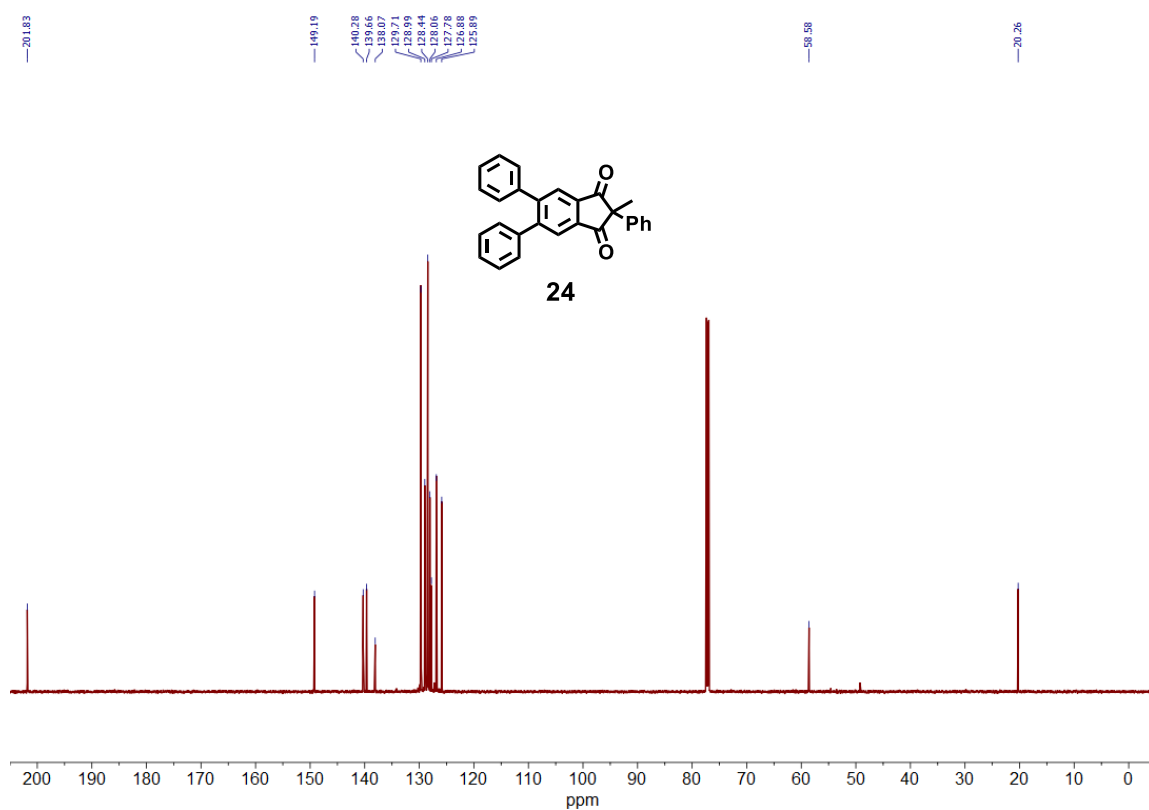

Figure S24. <sup>13</sup>C NMR spectrum (150 MHz, CDCl<sub>3</sub>, 25 °C) of 24.

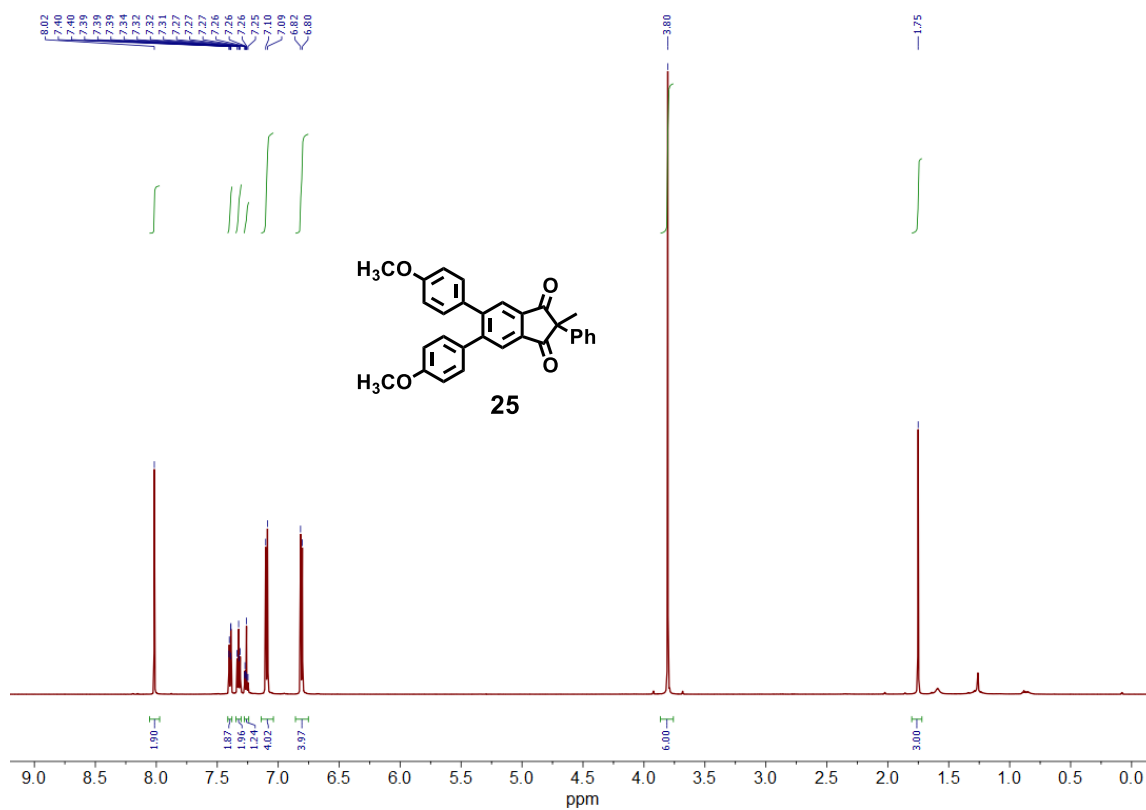

Figure S25. <sup>1</sup>H NMR spectrum (600 MHz, CDCl<sub>3</sub>, 25 °C) of **25**.

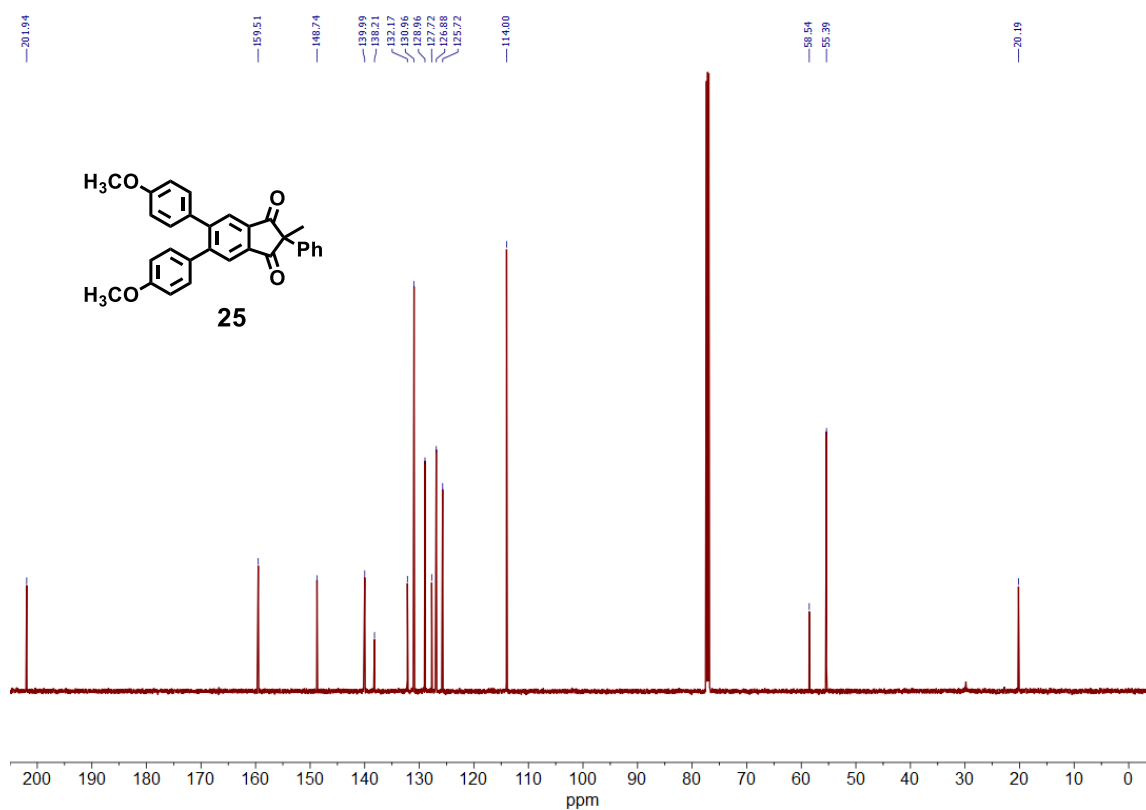

Figure S26. <sup>13</sup>C NMR spectrum (150 MHz, CDCl<sub>3</sub>, 25 °C) of **25**.

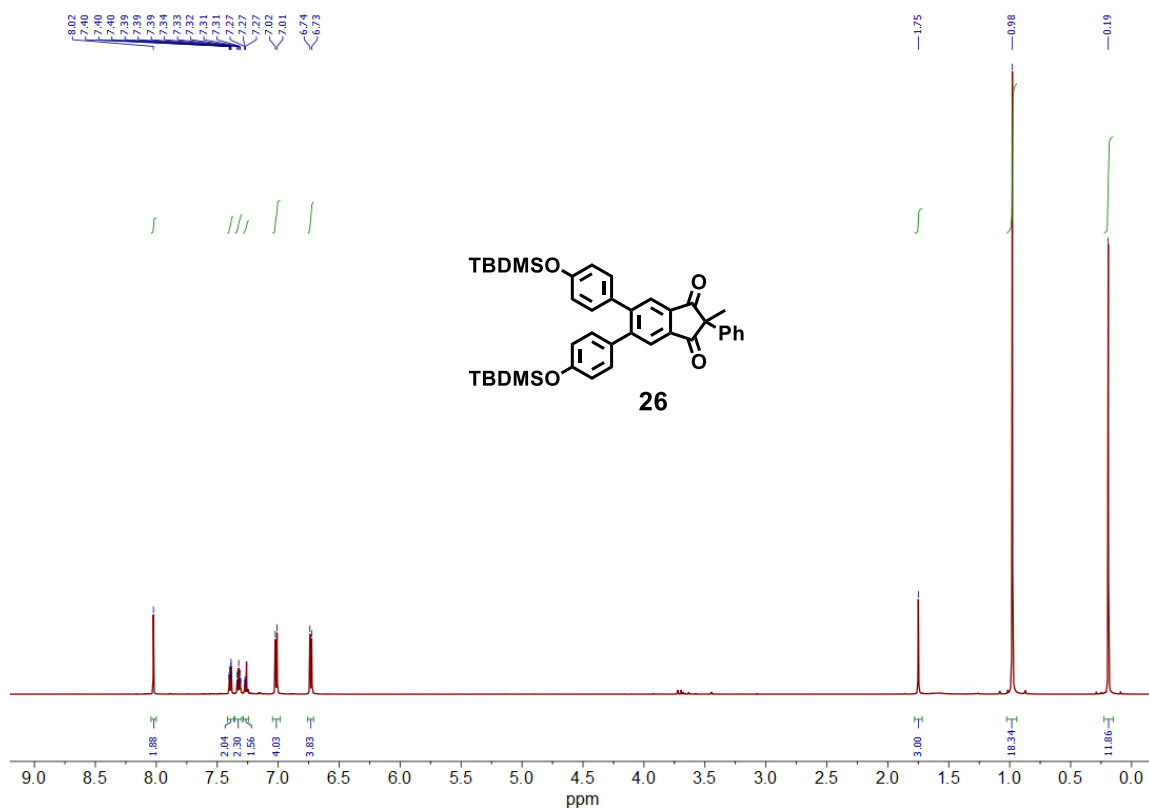

Figure S27.  $^1\text{H}$  NMR spectrum (600 MHz,  $\text{CDCl}_3$ , 25  $^\circ\text{C}$ ) of 26.

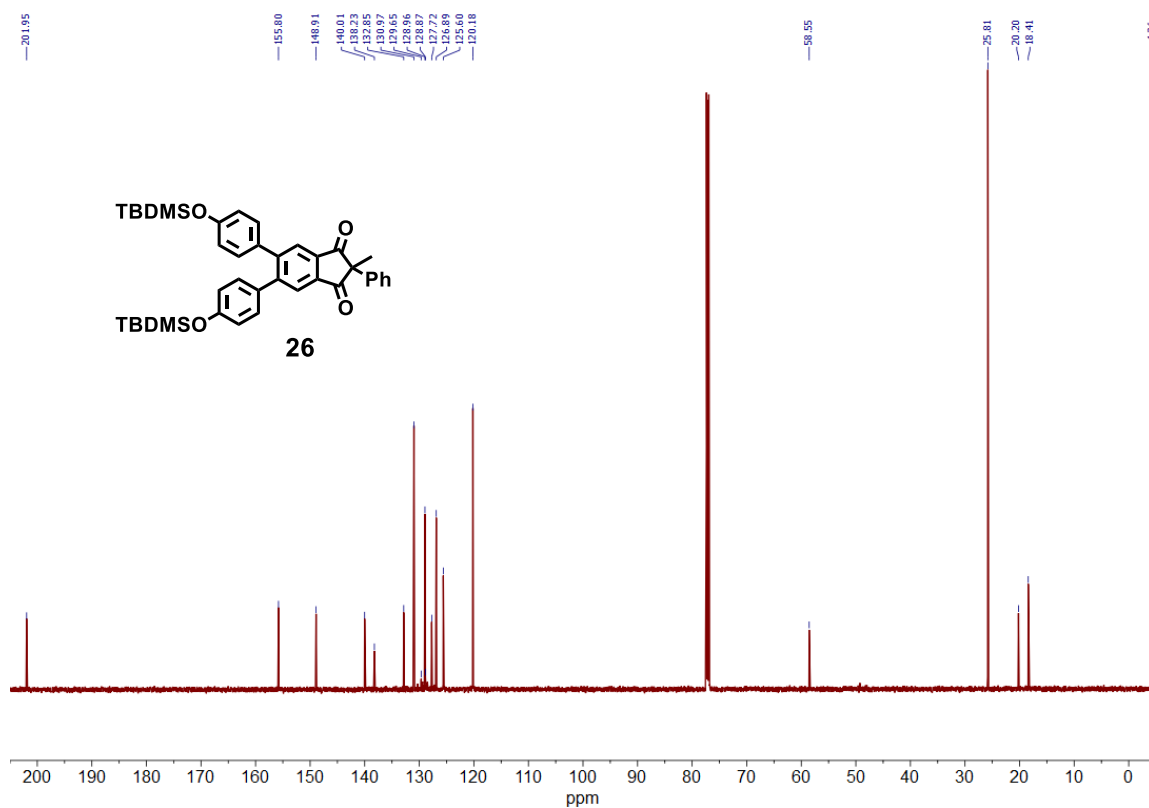

Figure S28.  $^{13}\text{C}$  NMR spectrum (150 MHz,  $\text{CDCl}_3$ , 25  $^\circ\text{C}$ ) of 26.

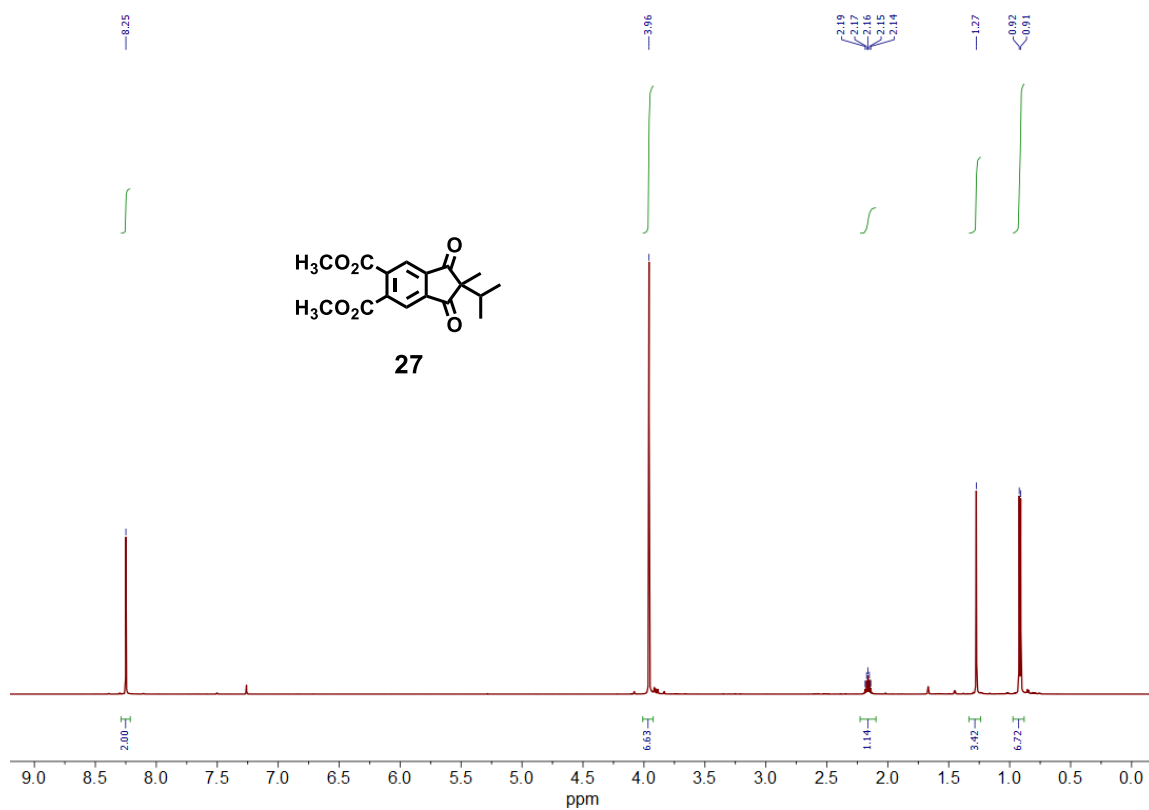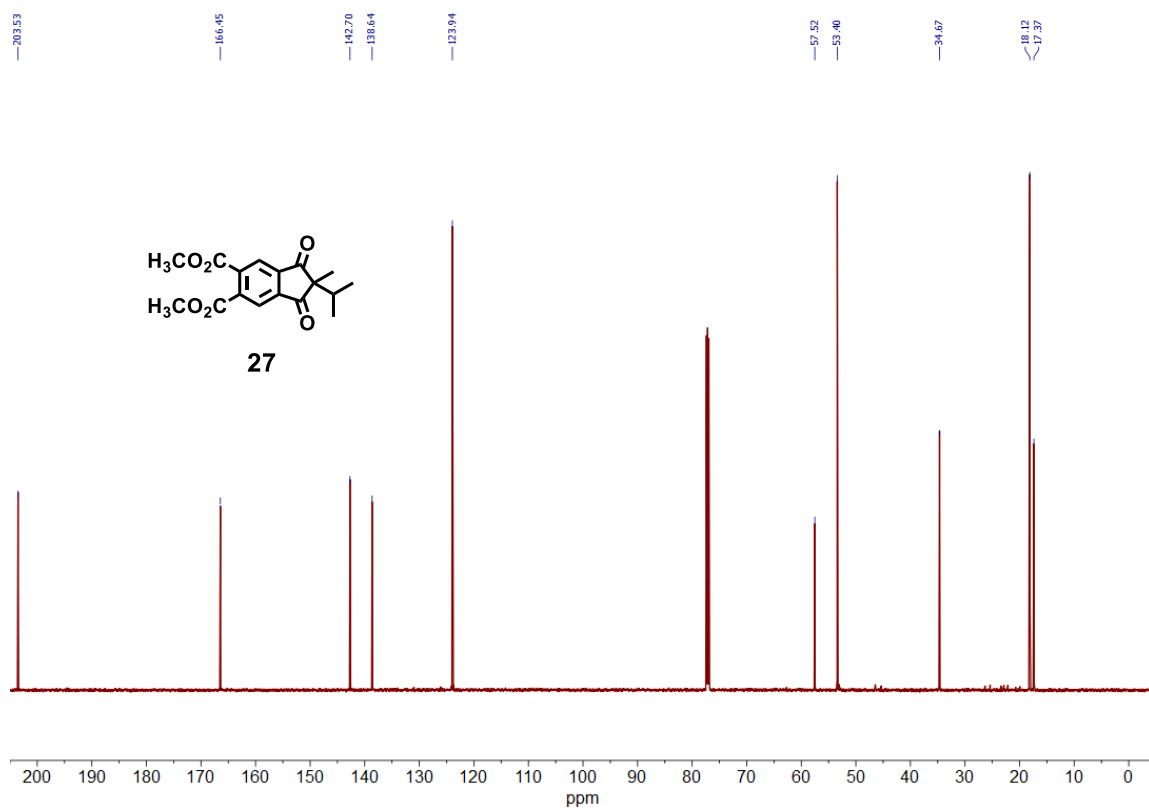

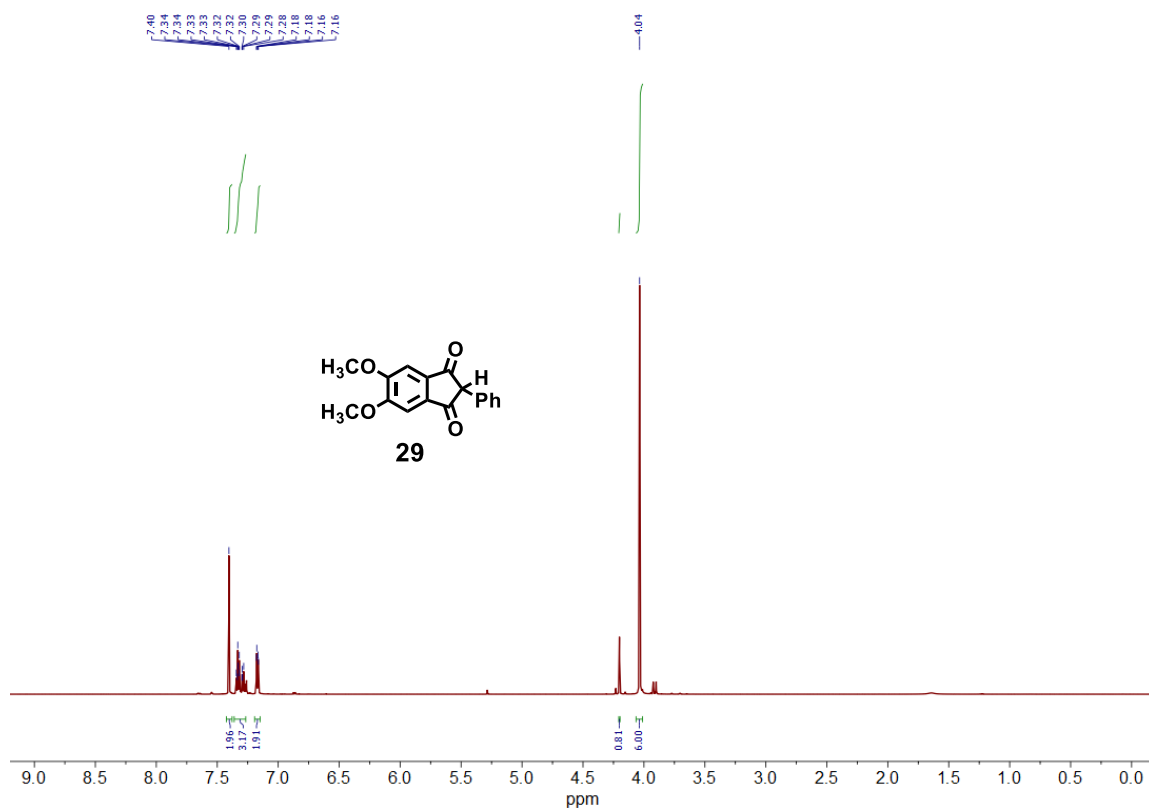

Figure S31. <sup>1</sup>H NMR spectrum (600 MHz, CDCl<sub>3</sub>, 25 °C) of **29**.

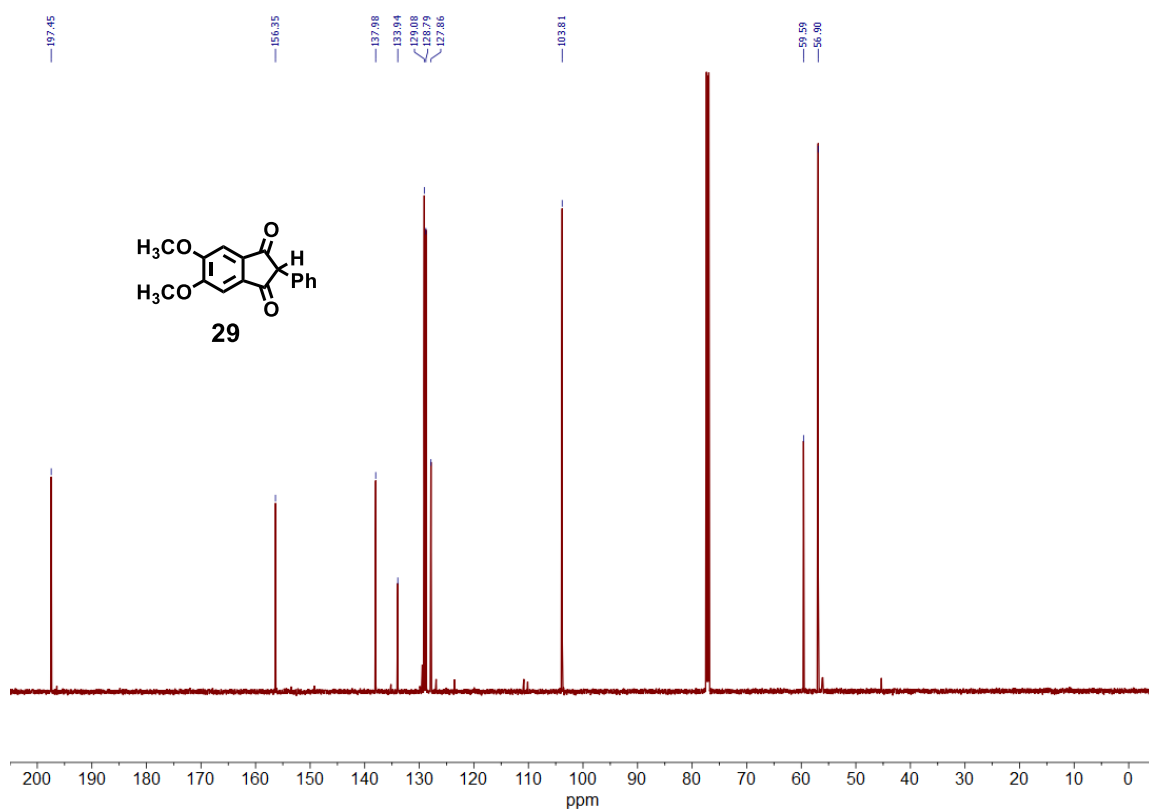

Figure S32. <sup>13</sup>C NMR spectrum (150 MHz, CDCl<sub>3</sub>, 25 °C) of **29**.

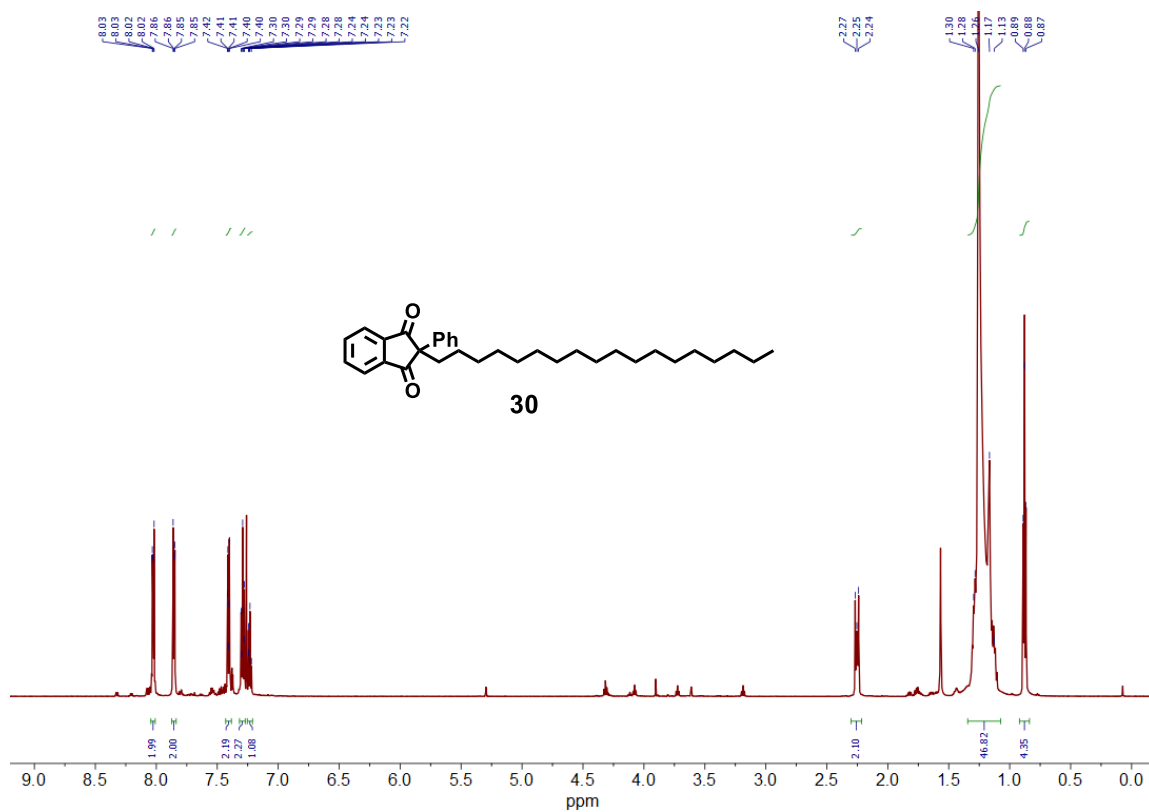

Figure S33. <sup>1</sup>H NMR spectrum (600 MHz, CDCl<sub>3</sub>, 25 °C) of 30.

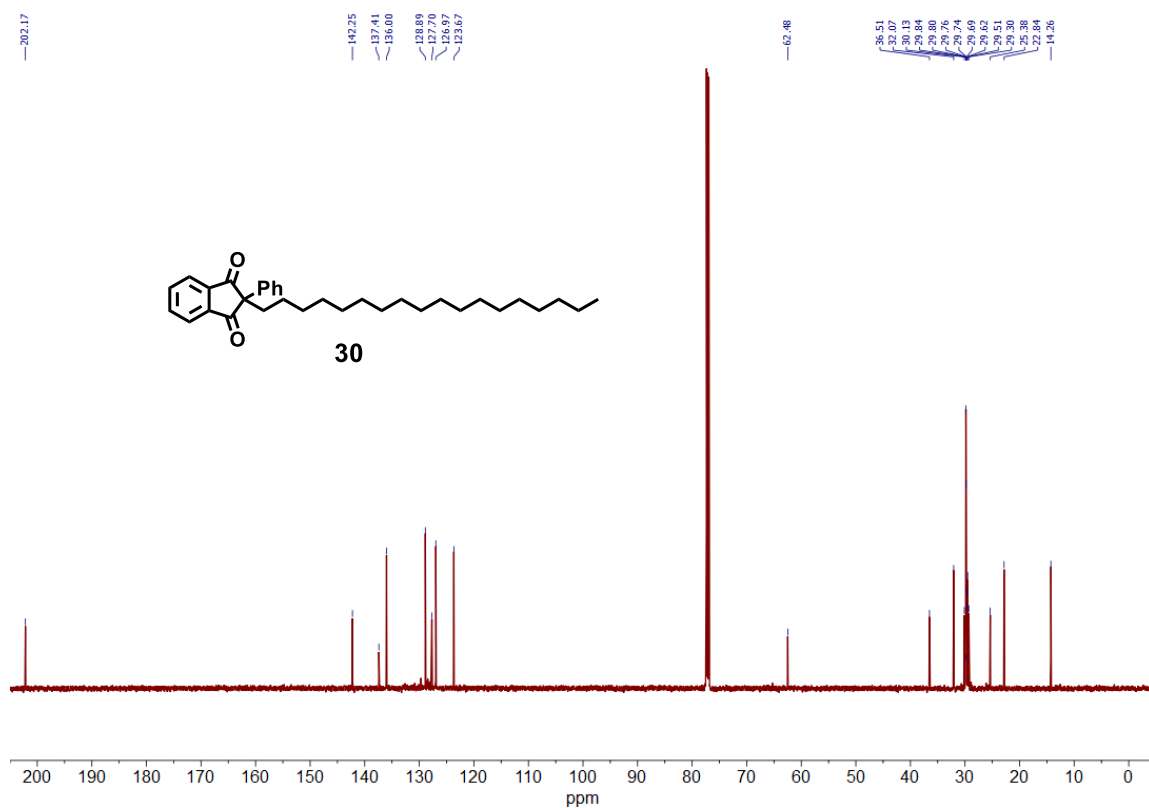

Figure S34. <sup>13</sup>C NMR spectrum (150 MHz, CDCl<sub>3</sub>, 25 °C) of 30.

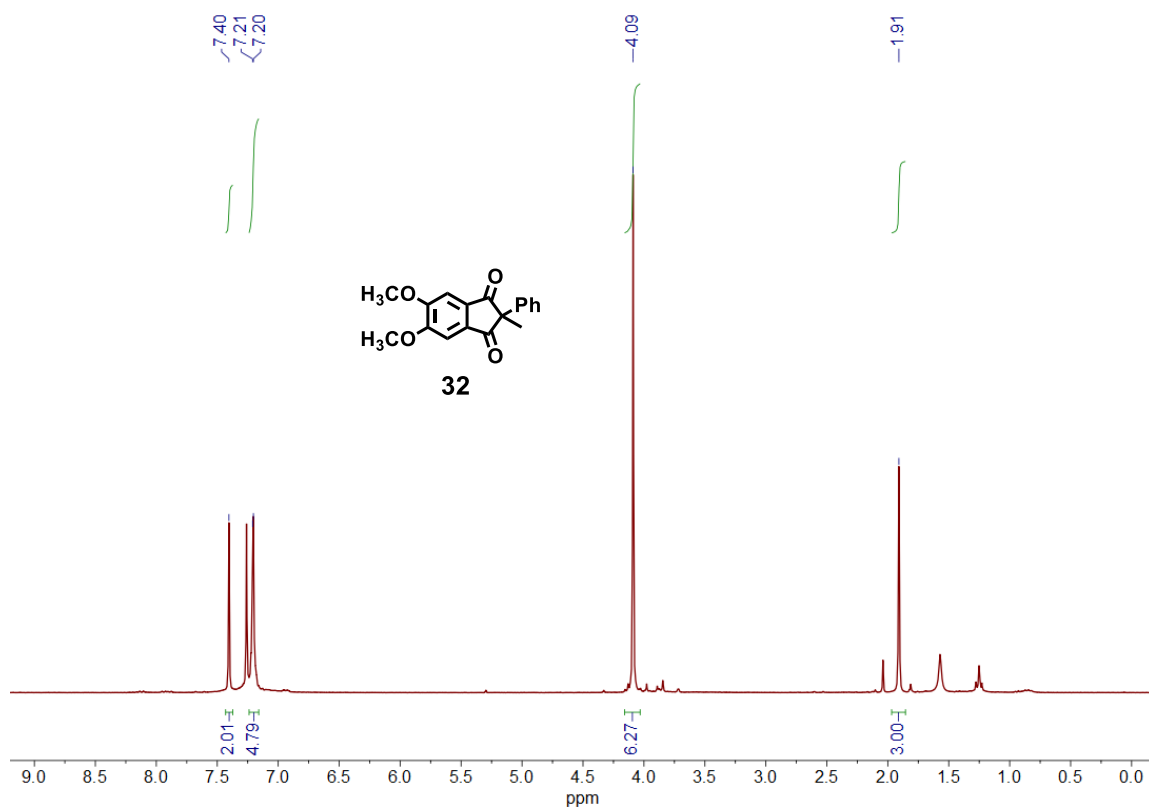

Figure S35. <sup>1</sup>H NMR spectrum (300 MHz, CDCl<sub>3</sub>, 25 °C) of 32.

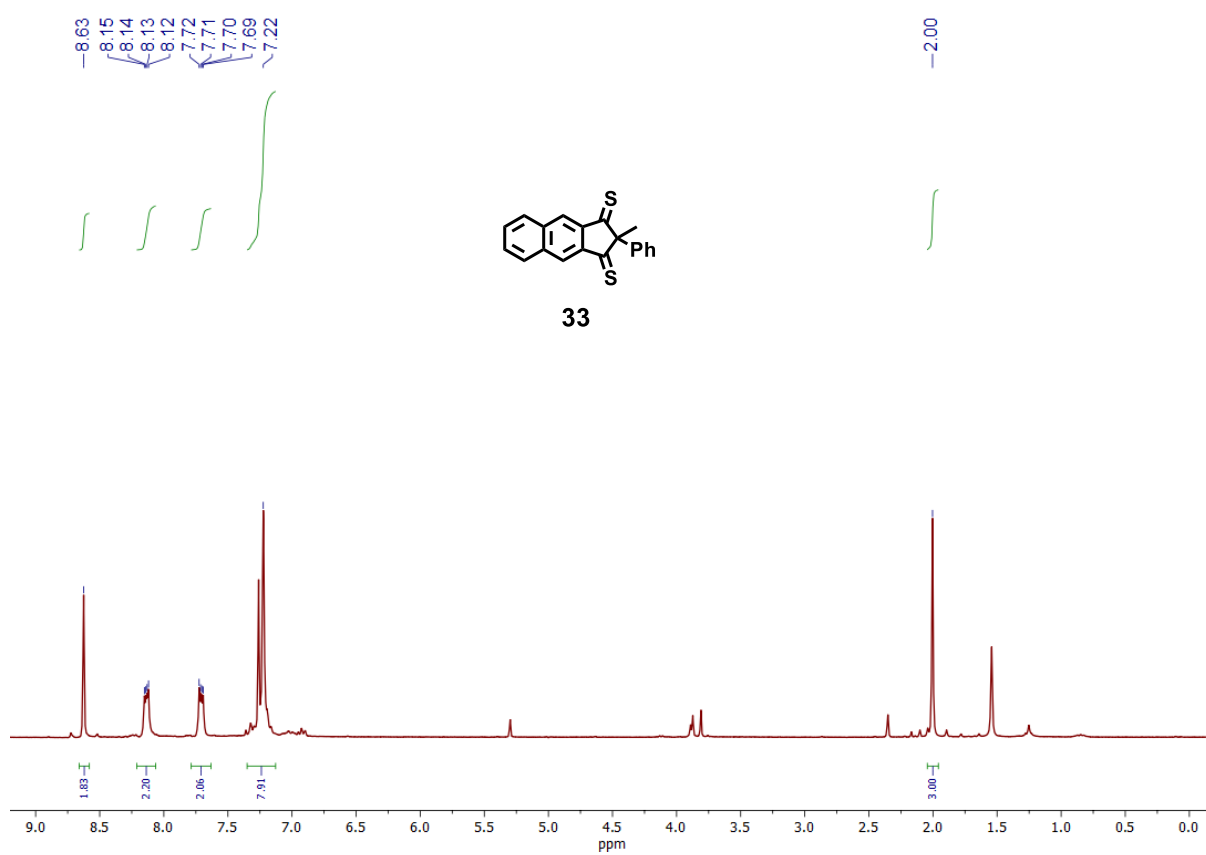

Figure S36. <sup>1</sup>H NMR spectrum (400 MHz, CDCl<sub>3</sub>, 25 °C) of 33.

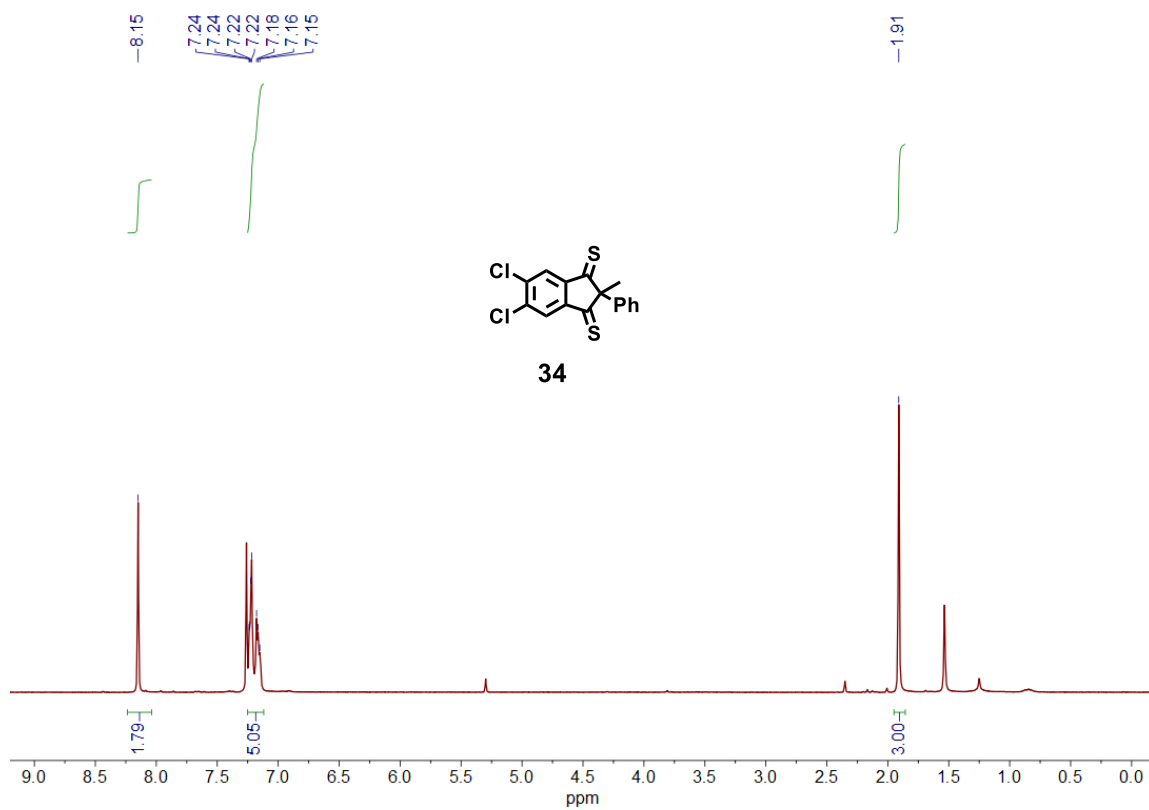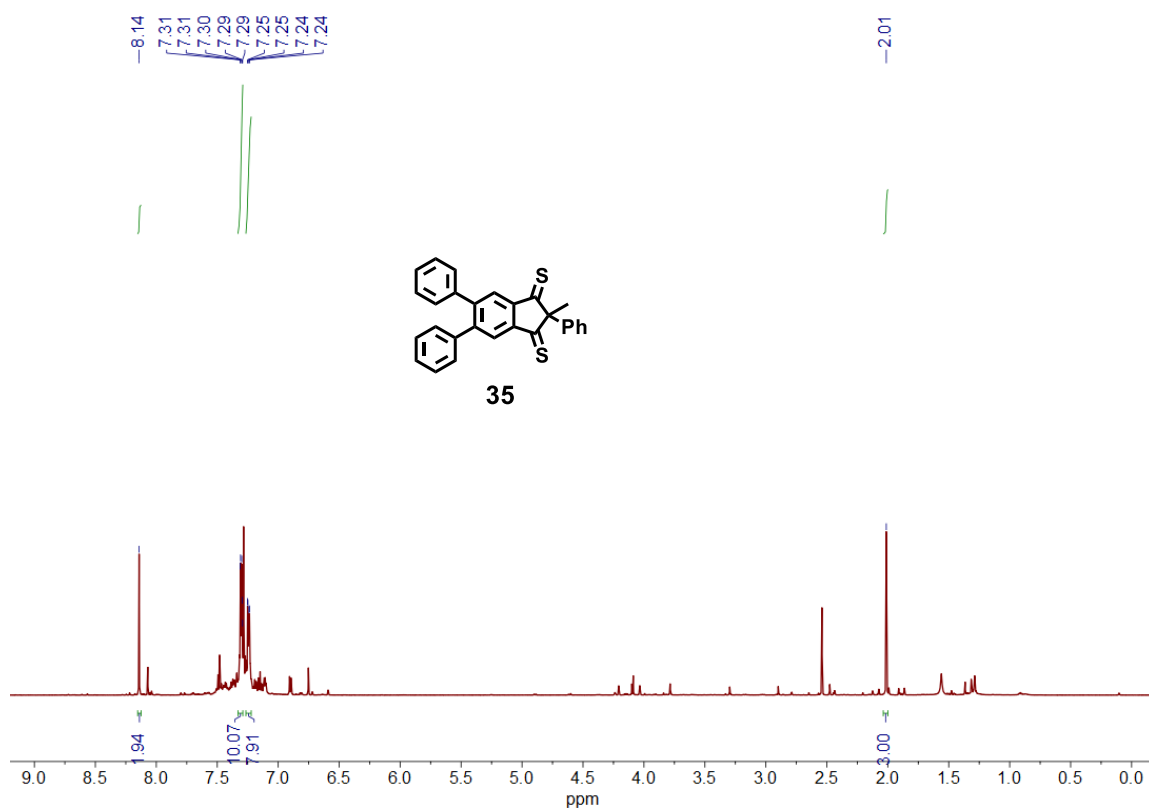



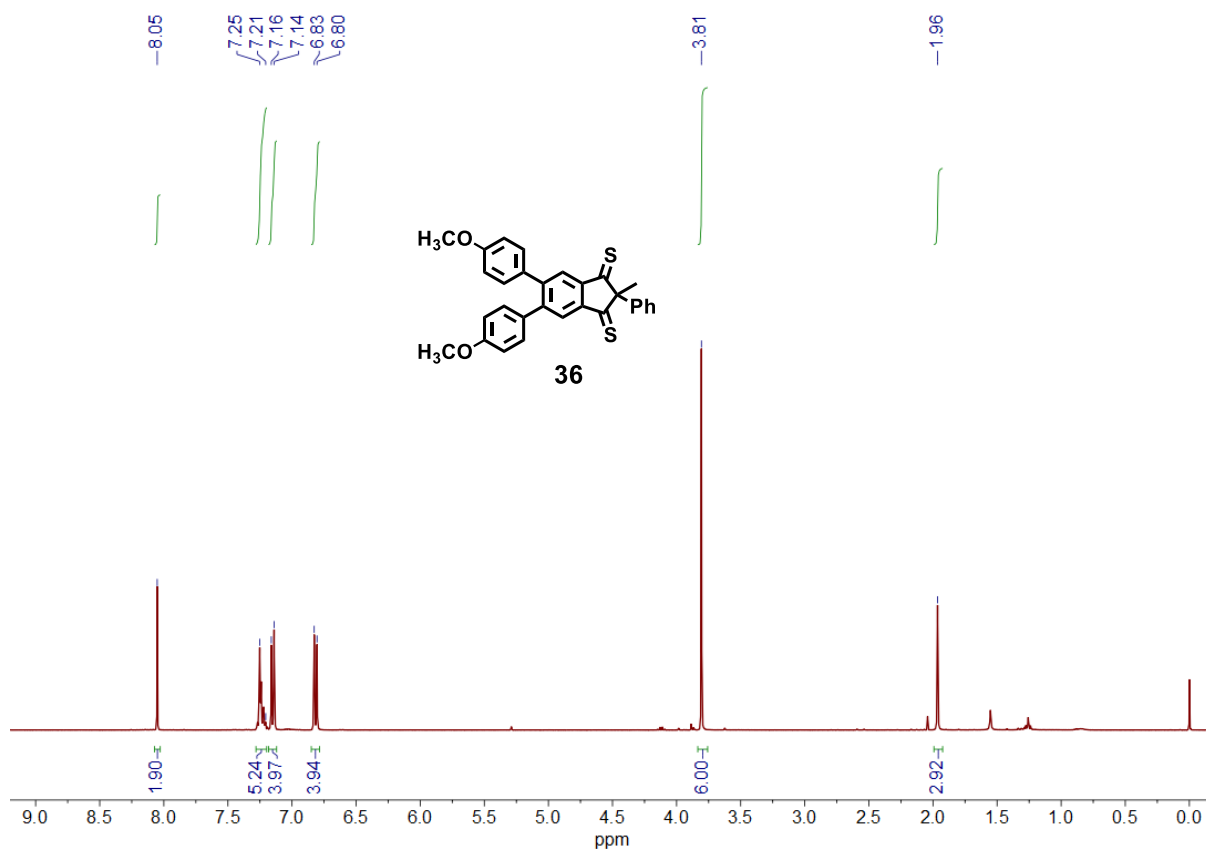

Figure S39.  $^1\text{H}$  NMR spectrum (400 MHz,  $\text{CDCl}_3$ , 25  $^\circ\text{C}$ ) of 36.

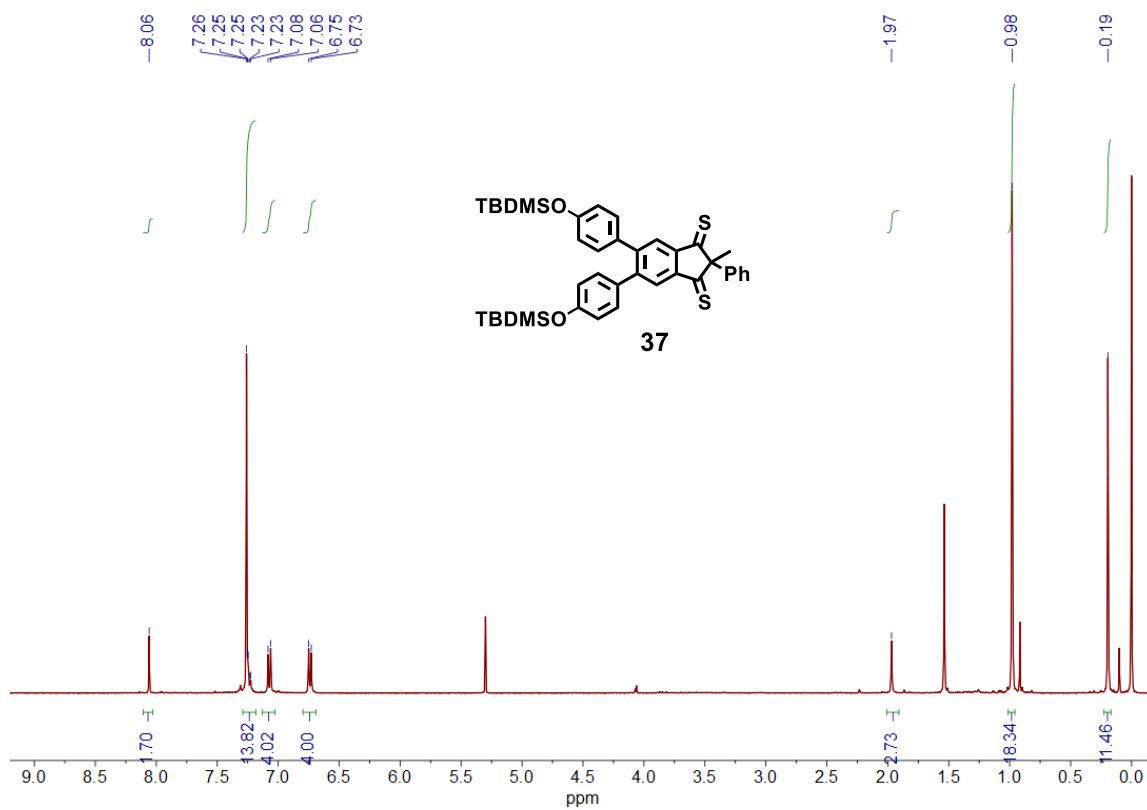

Figure S40.  $^1\text{H}$  NMR spectrum (400 MHz,  $\text{CDCl}_3$ , 25  $^\circ\text{C}$ ) of 37.

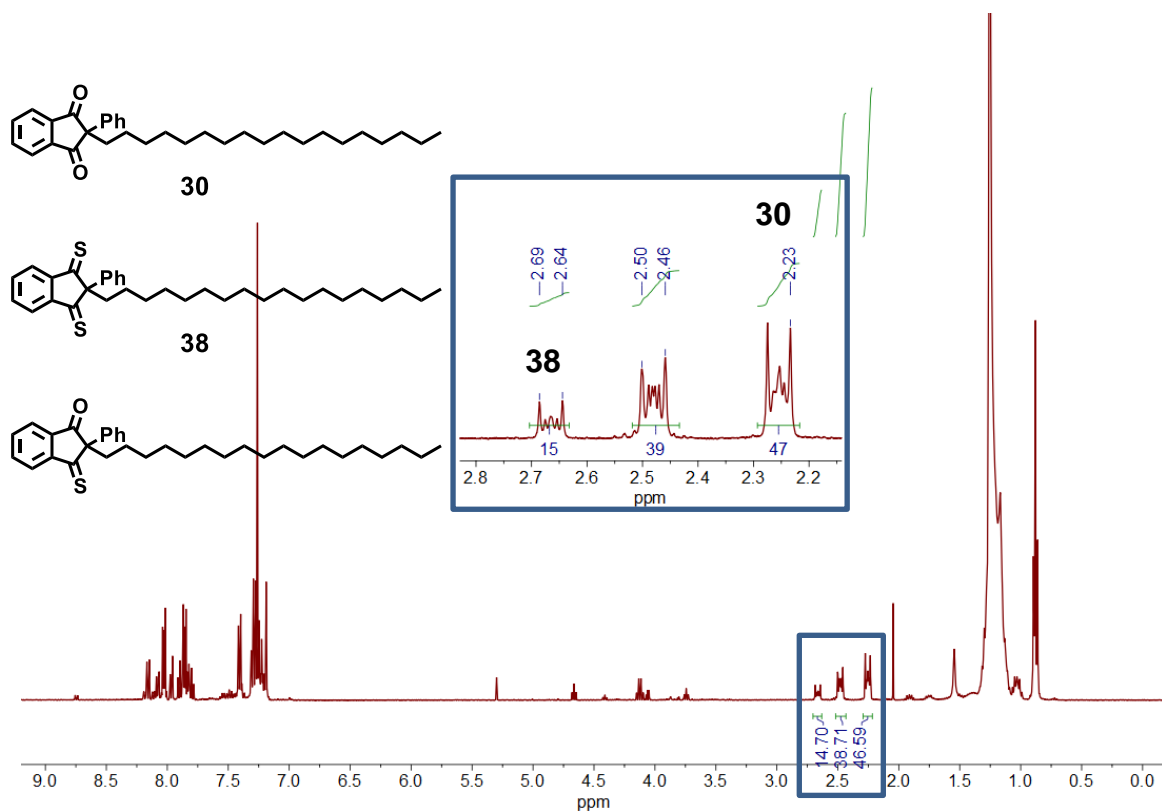

**Figure S41.**  $^1\text{H}$  NMR spectrum (400 MHz,  $\text{CDCl}_3$ , 25 °C) of the 15:39:47 ternary mixture of 38, 30 and singly converted product, respectively.

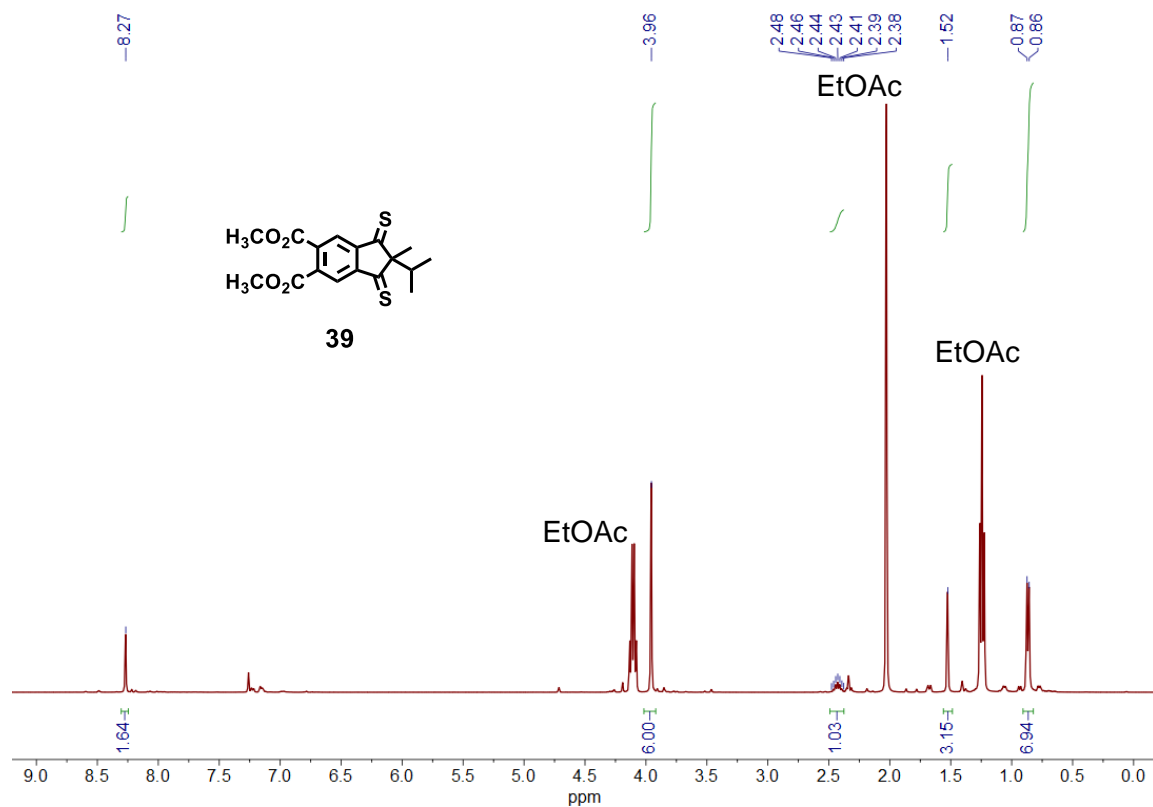

**Figure S42.**  $^1\text{H}$  NMR spectrum (400 MHz,  $\text{CDCl}_3$ , 25 °C) of 39.

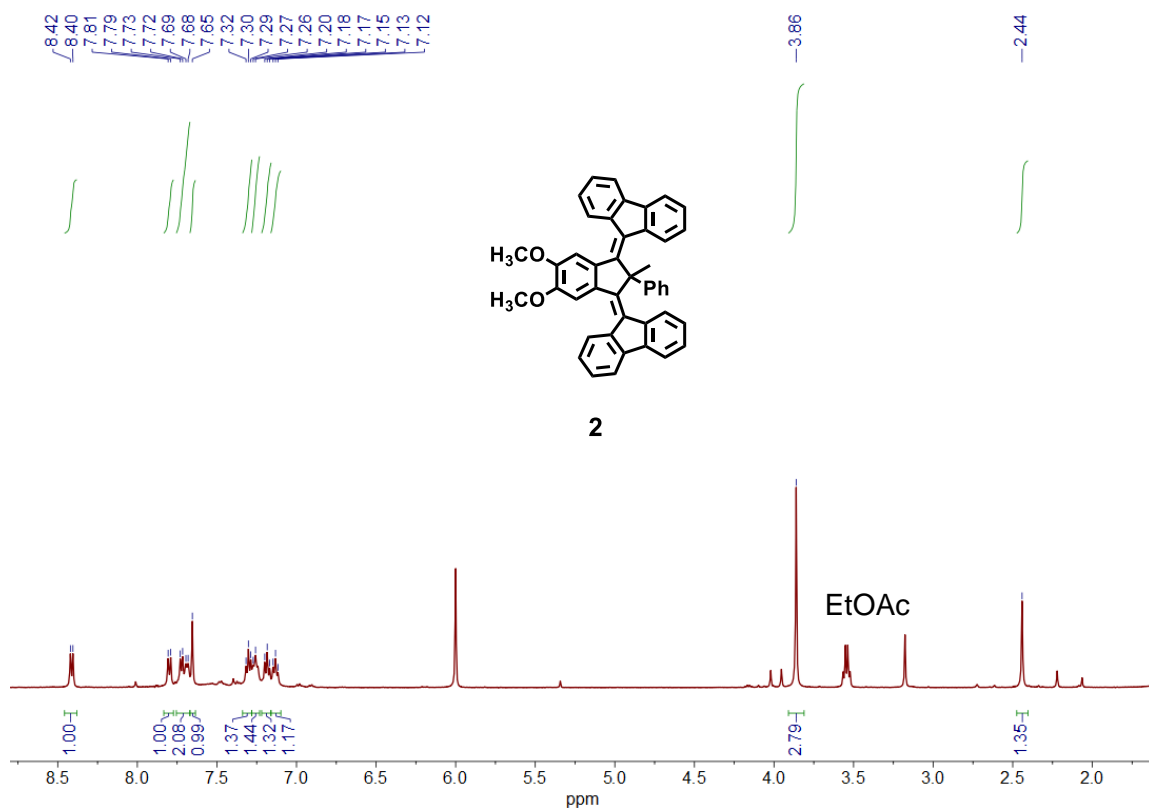

Figure S43. <sup>1</sup>H NMR spectrum (500 MHz, Cl<sub>2</sub>DCCDCl<sub>2</sub>, 90 °C) of **2**.

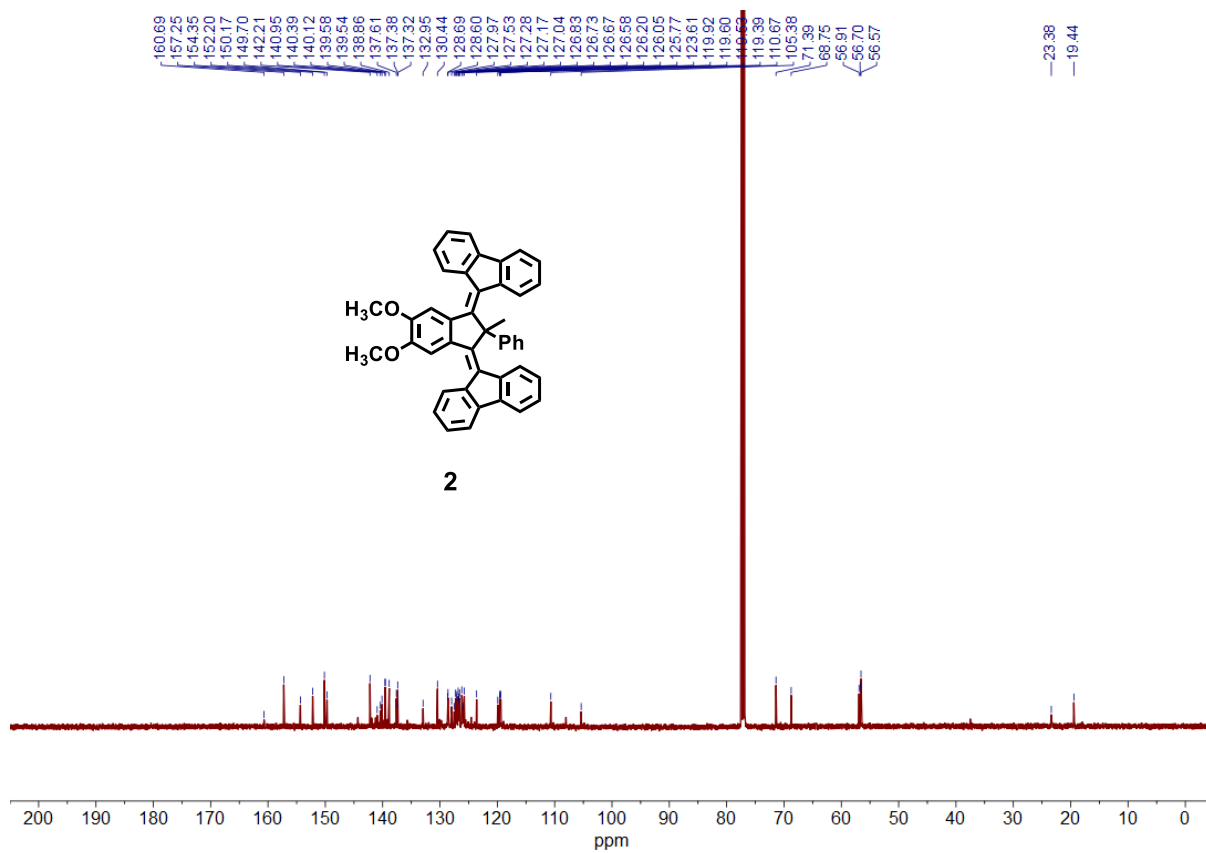

Figure S44. <sup>13</sup>C NMR spectrum (125 MHz, CDCl<sub>3</sub>, -45 °C) of **2**.

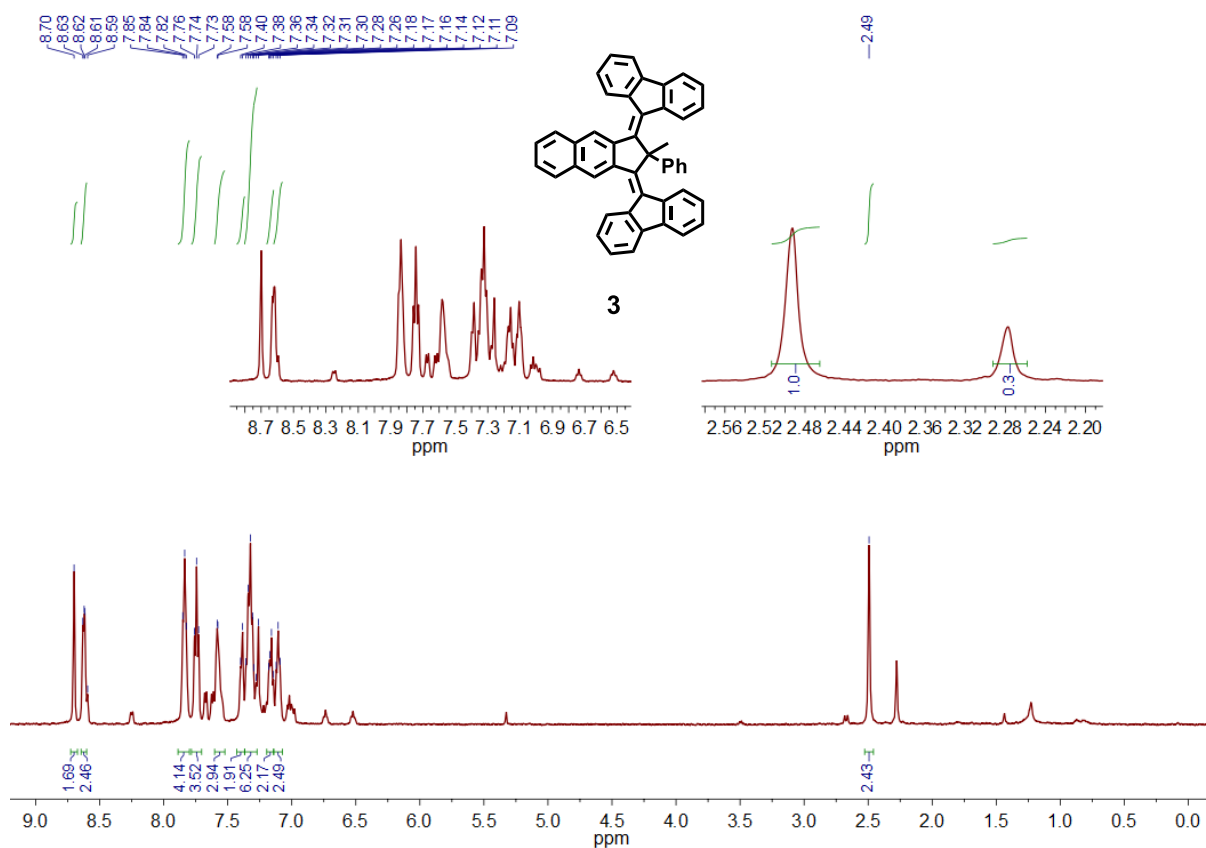

Figure S45.  $^1\text{H}$  NMR spectrum (500 MHz,  $\text{CDCl}_3$ ,  $-45\text{ }^\circ\text{C}$ ) of **3**.

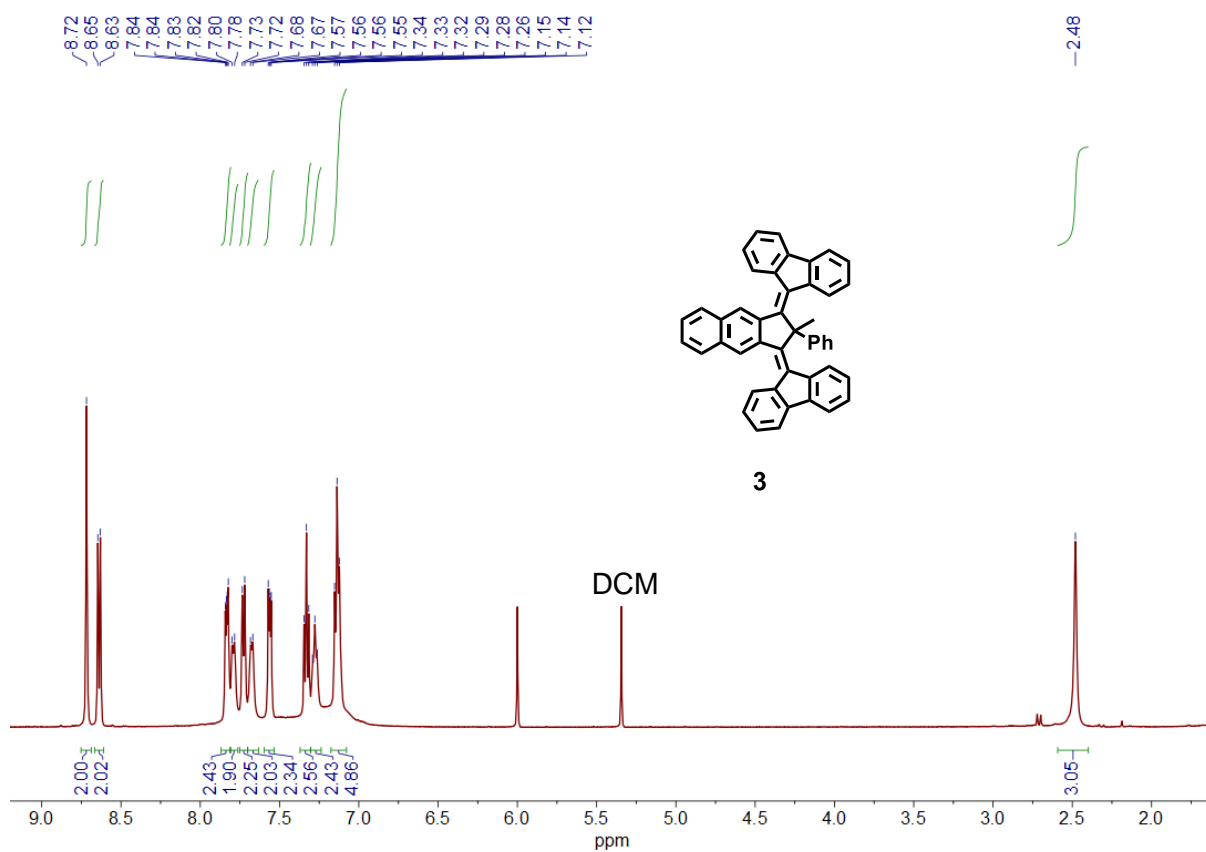

Figure S46.  $^1\text{H}$  NMR spectrum (500 MHz,  $\text{Cl}_2\text{DCCDCl}_2$ ,  $90\text{ }^\circ\text{C}$ ) of **3**.

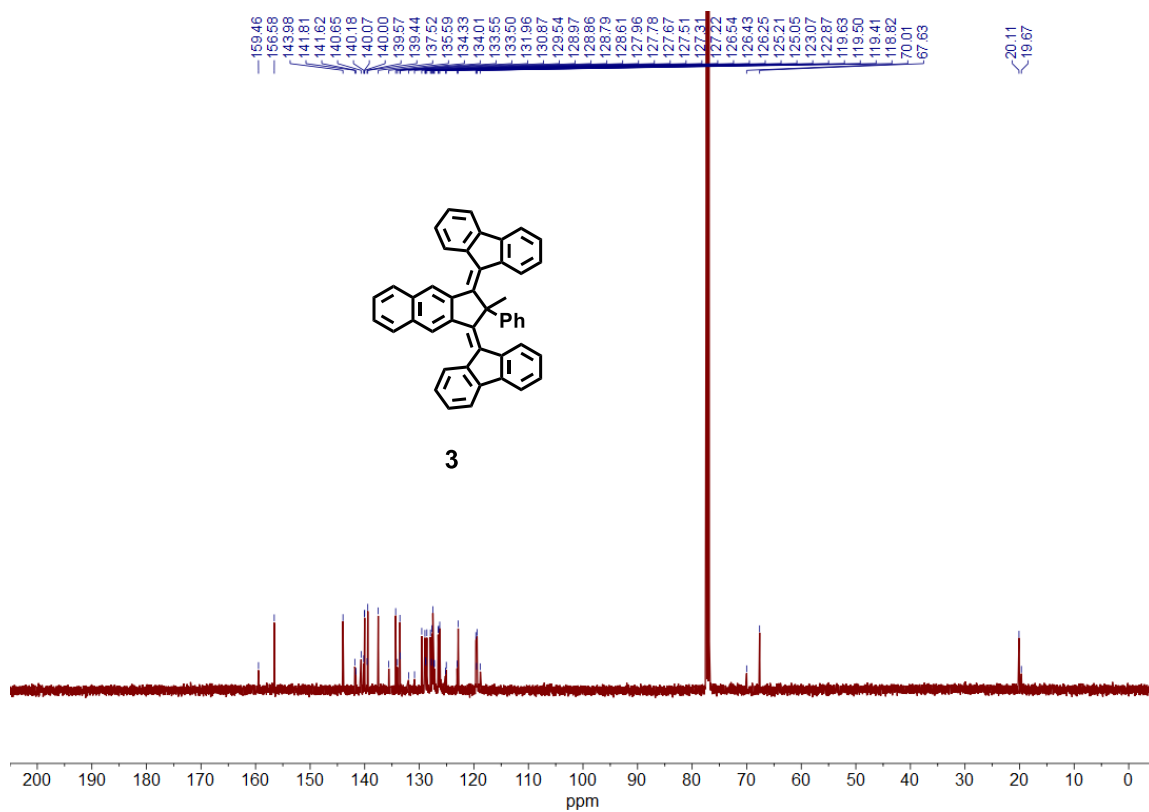

Figure S47.  $^{13}\text{C}$  NMR spectrum (125 MHz,  $\text{CDCl}_3$ ,  $-45^\circ\text{C}$ ) of 3.

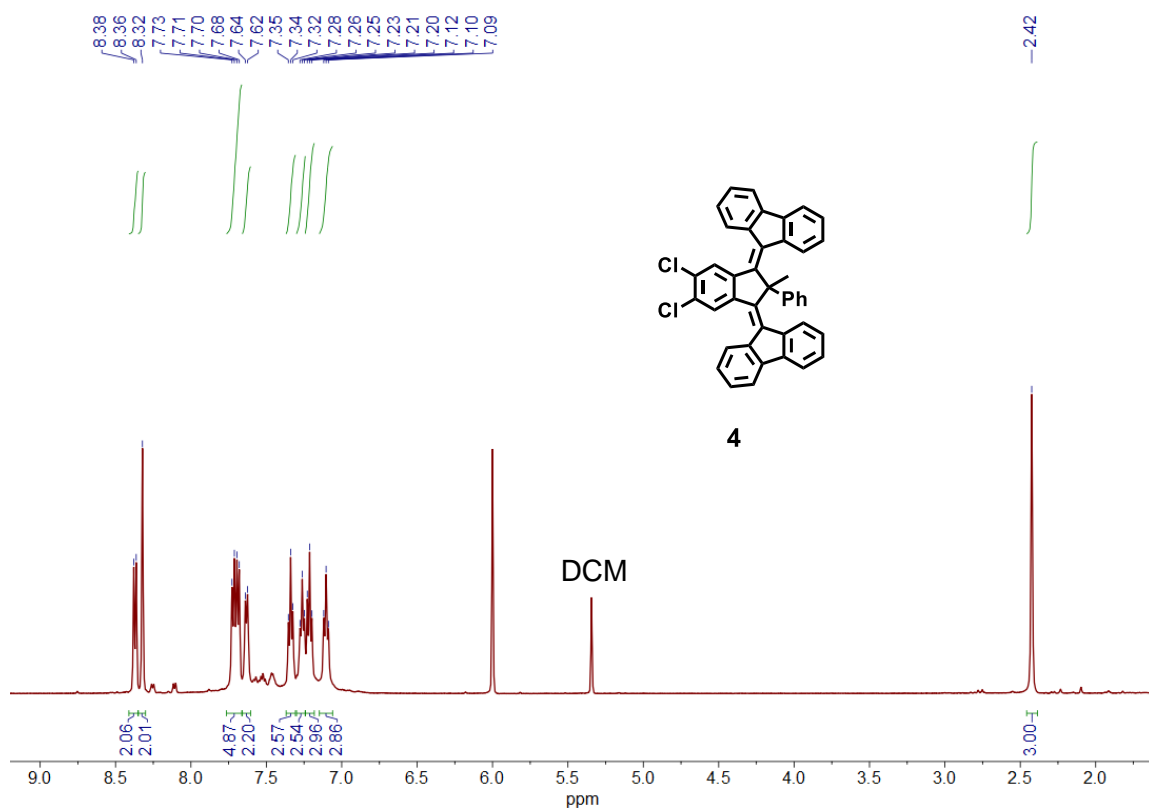

Figure S48.  $^1\text{H}$  NMR spectrum (500 MHz,  $\text{Cl}_2\text{DCCDCl}_2$ ,  $90^\circ\text{C}$ ) of 4.

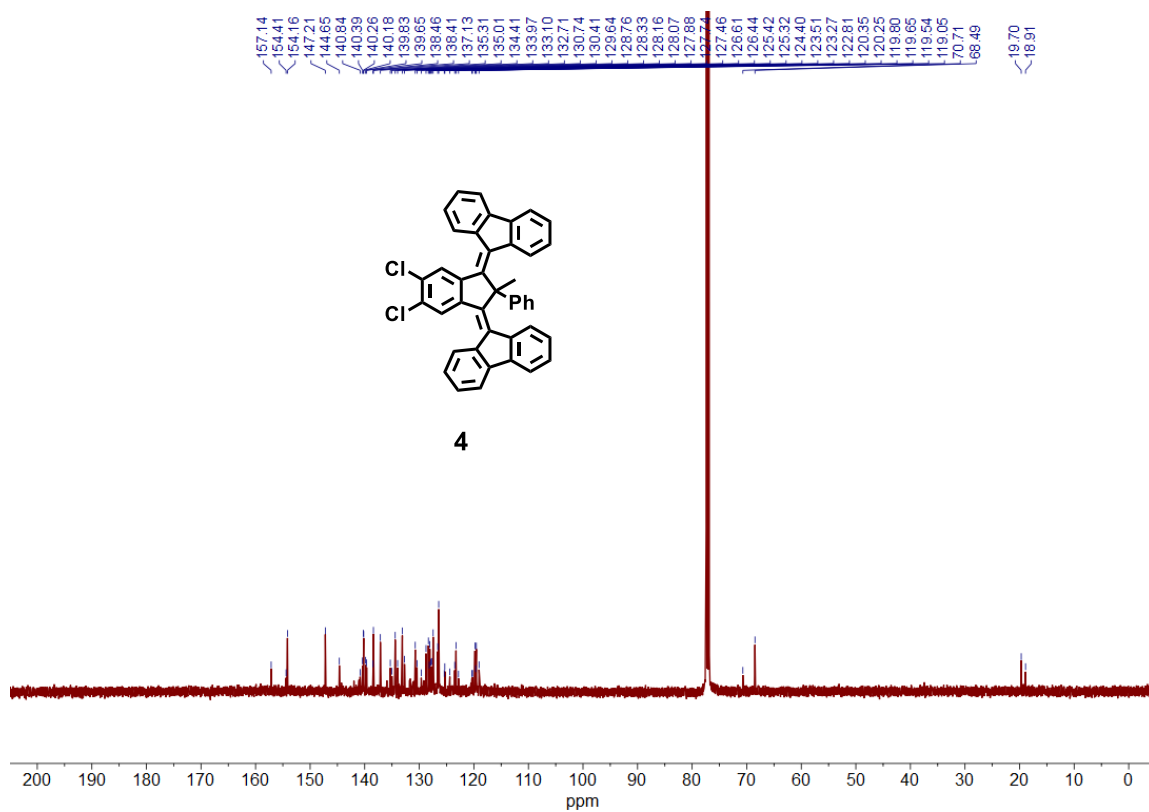

Figure S49. <sup>13</sup>C NMR spectrum (125 MHz, CDCl<sub>3</sub>, -45 °C) of **4**.

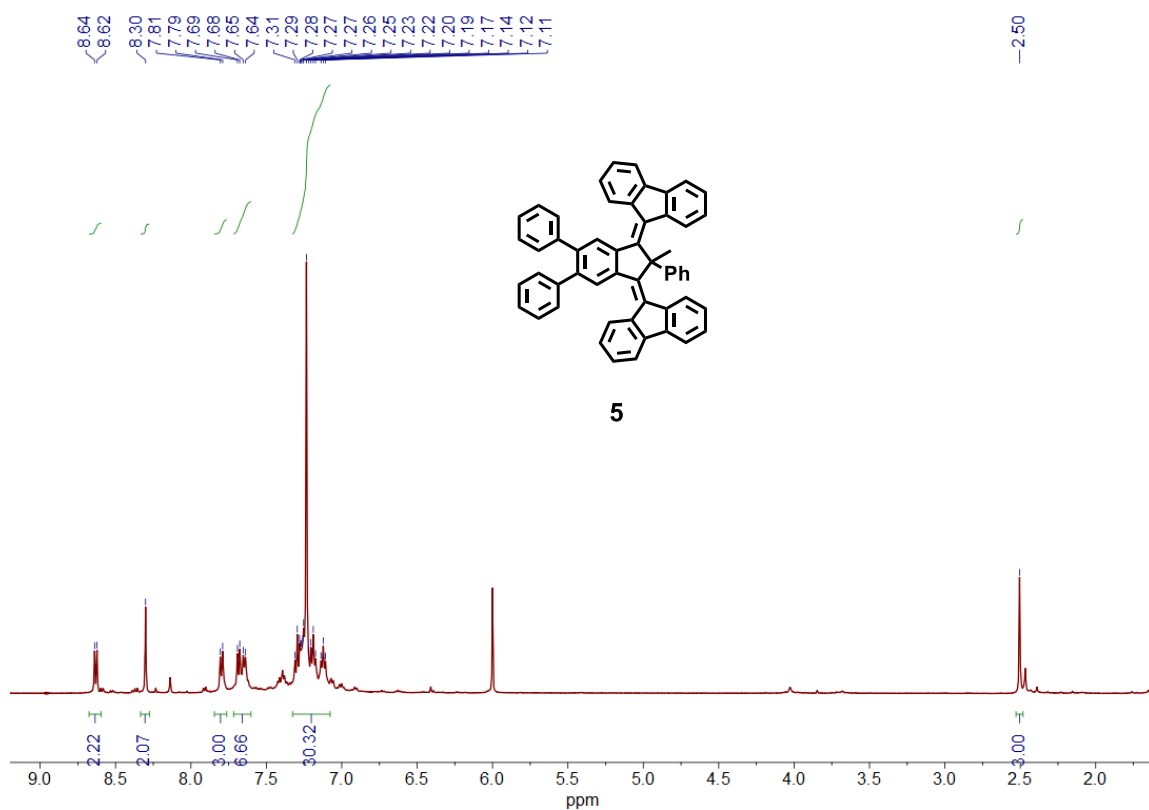

Figure S50. <sup>1</sup>H NMR spectrum (500 MHz, Cl<sub>2</sub>DCCDCl<sub>2</sub>, 90 °C) of **5**.

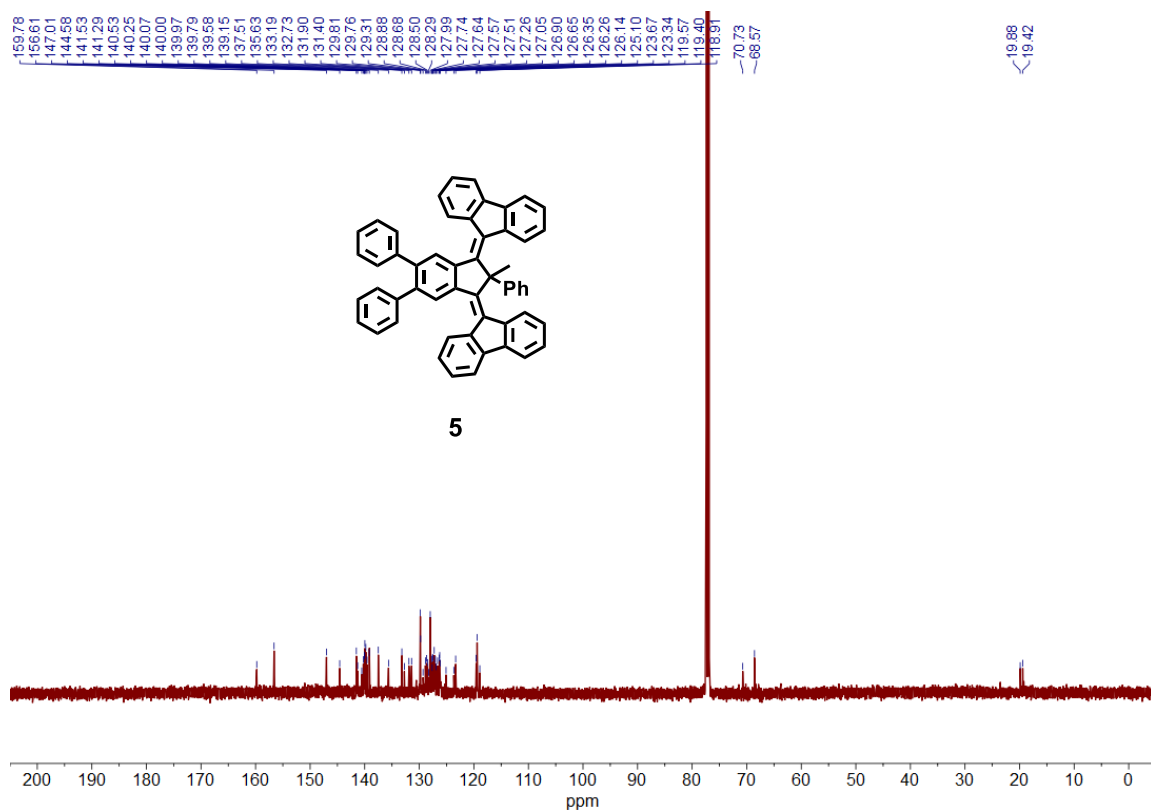

Figure S51. <sup>13</sup>C NMR spectrum (125 MHz, CDCl<sub>3</sub>, -45 °C) of 5.

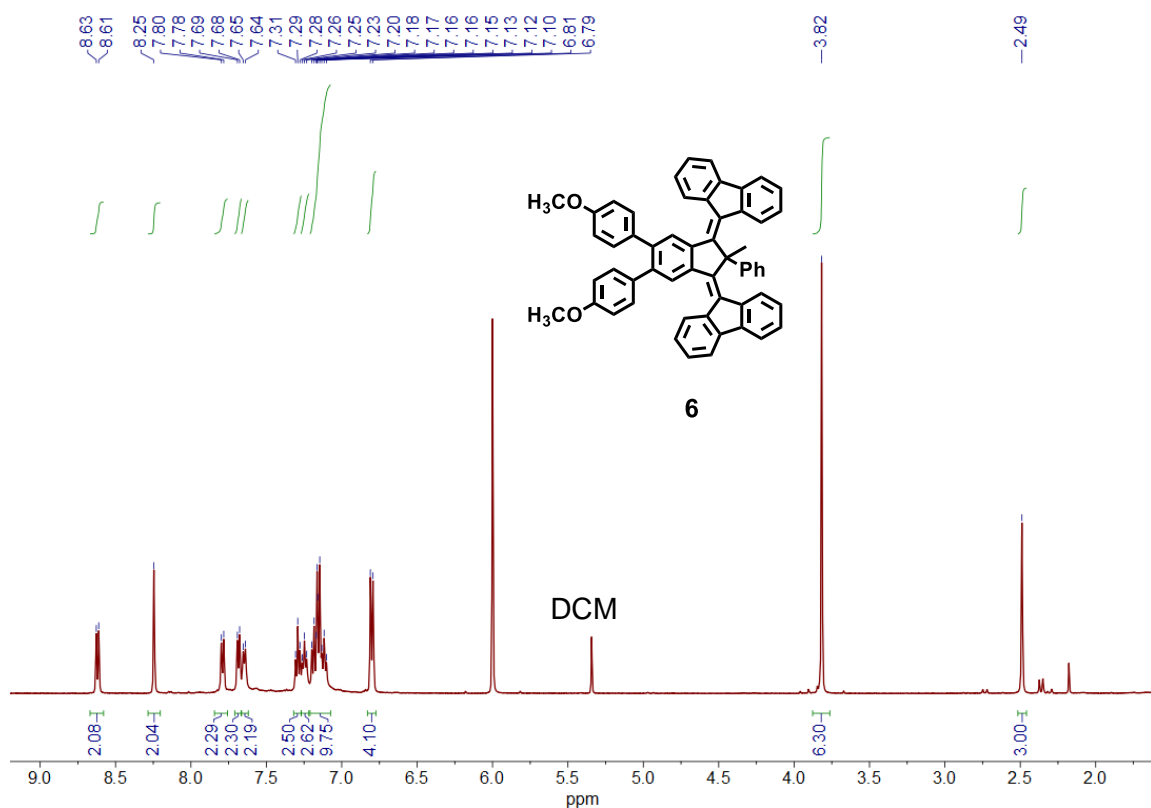

Figure S52. <sup>1</sup>H NMR spectrum (500 MHz, Cl<sub>2</sub>DCCDCl<sub>2</sub>, 90 °C) of 6.

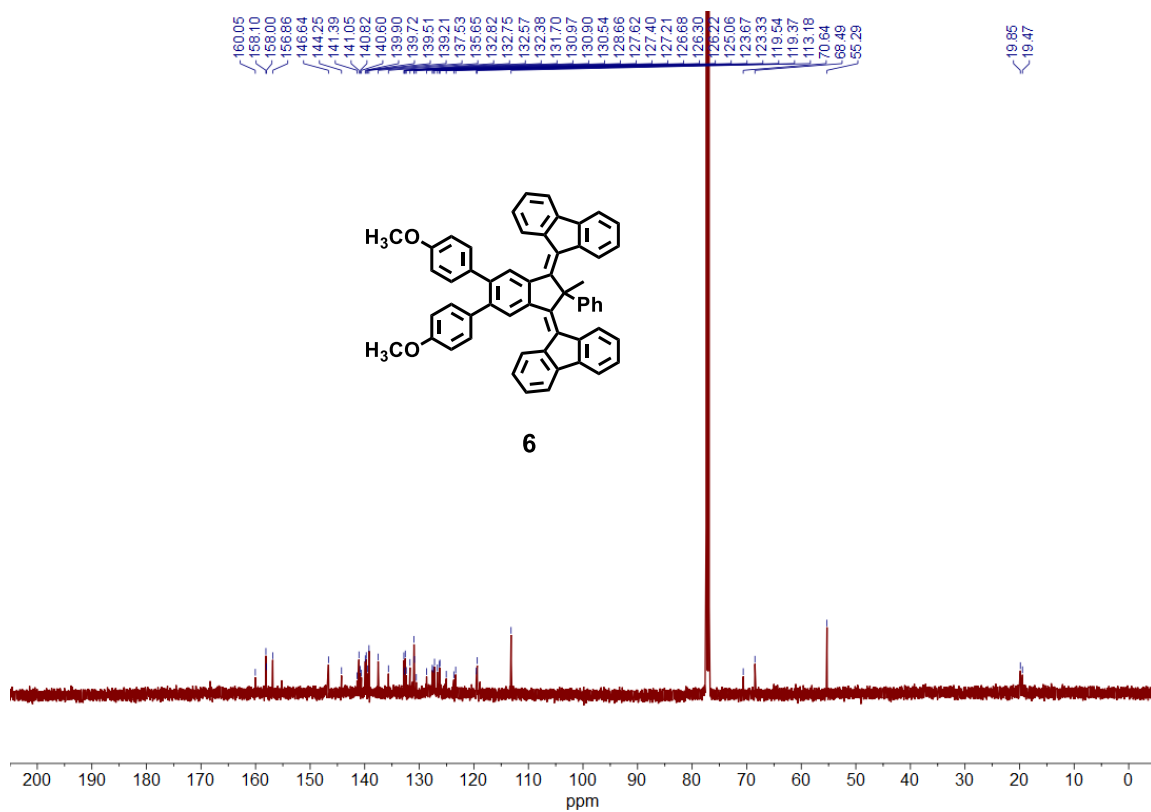

Figure S53.  $^{13}\text{C}$  NMR spectrum (125 MHz,  $\text{CDCl}_3$ ,  $-45^\circ\text{C}$ ) of 6.

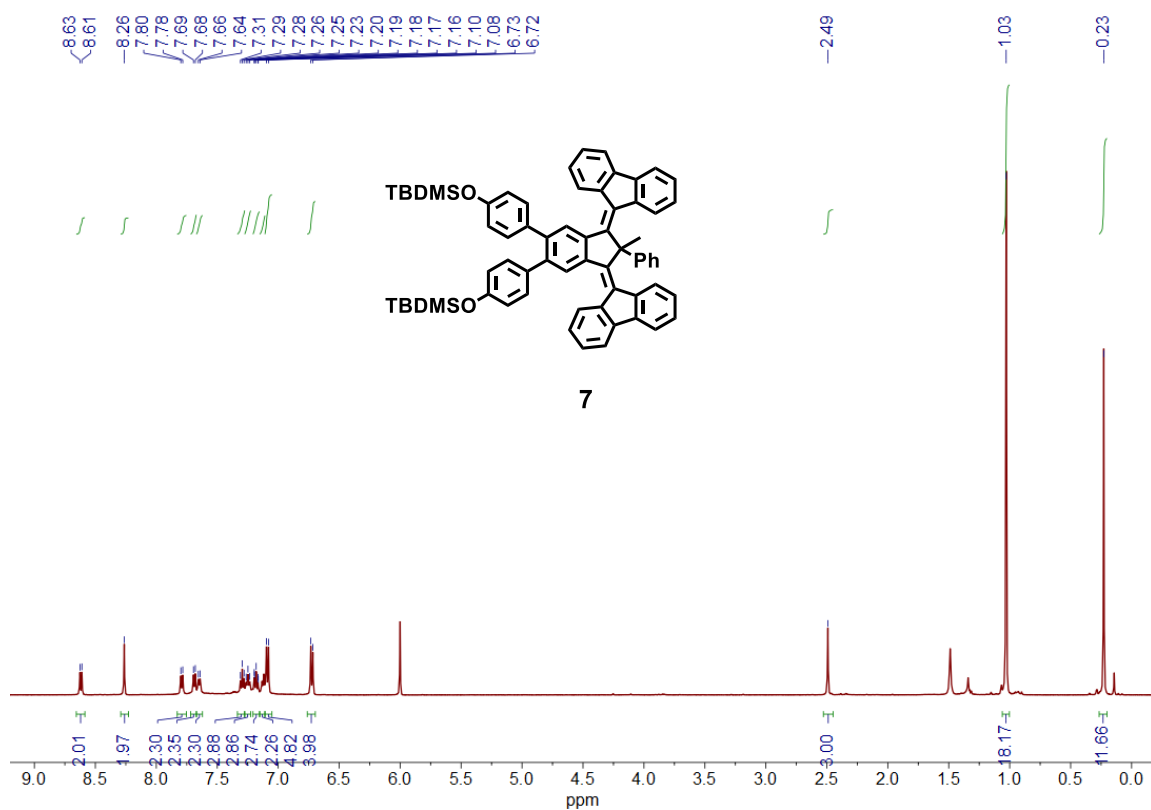

Figure S54.  $^1\text{H}$  NMR spectrum (500 MHz,  $\text{Cl}_2\text{DCCDCl}_2$ ,  $90^\circ\text{C}$ ) of 7.



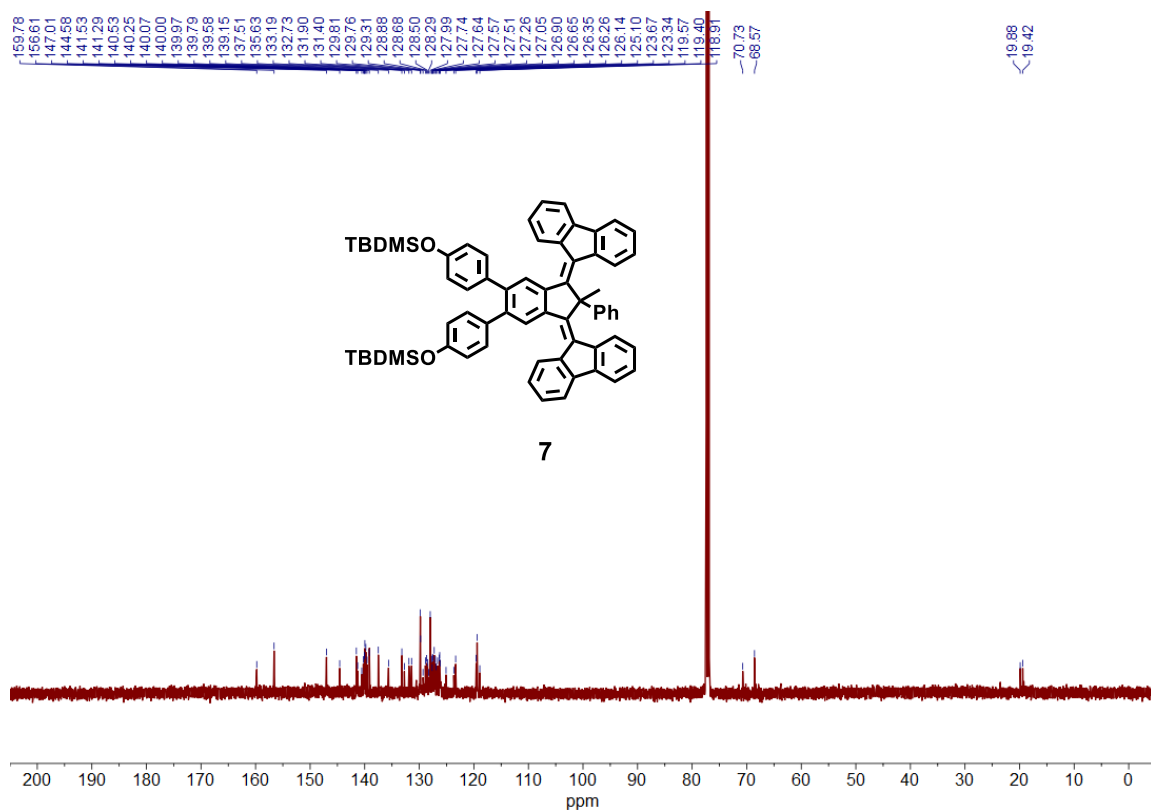

Figure S55. <sup>13</sup>C NMR spectrum (125 MHz, CDCl<sub>3</sub>, -45 °C) of 7.

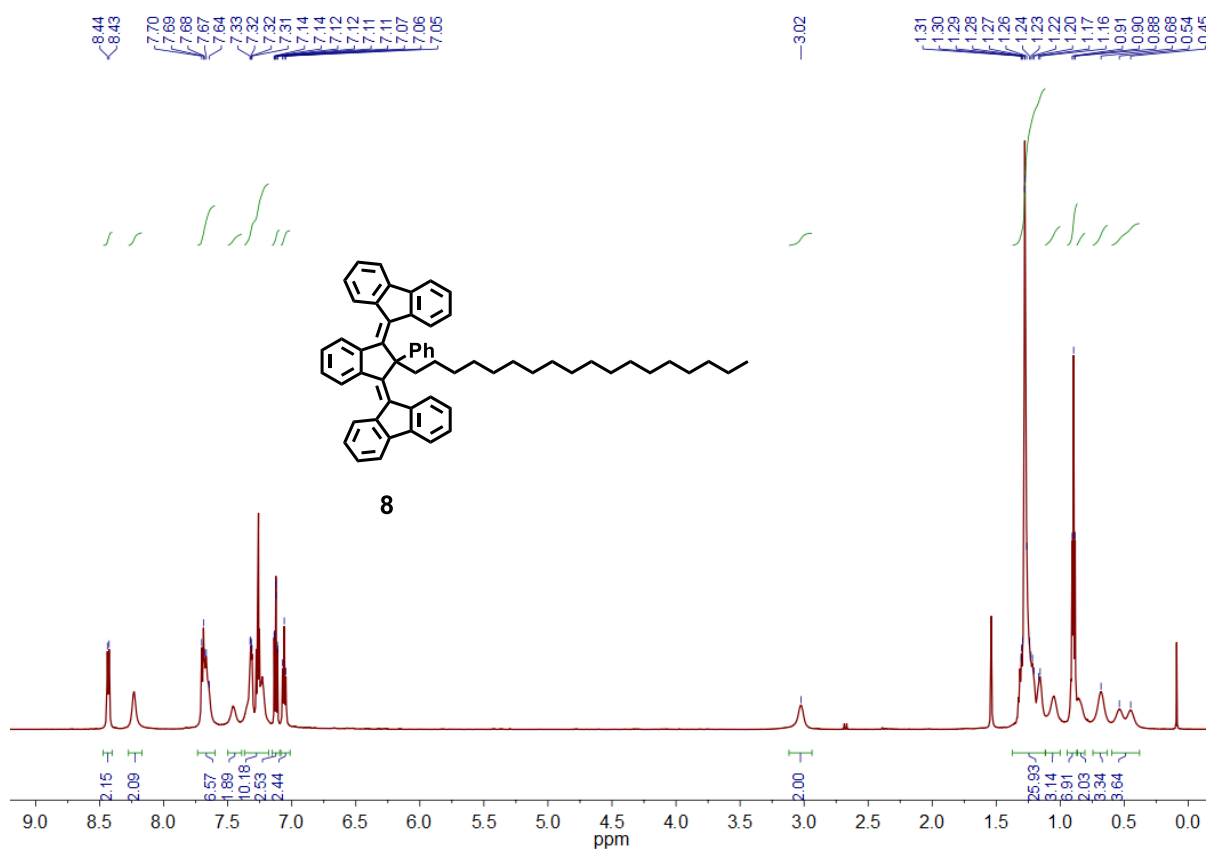

Figure S56. <sup>1</sup>H NMR spectrum (600 MHz, CDCl<sub>3</sub>, 25 °C) of 8.

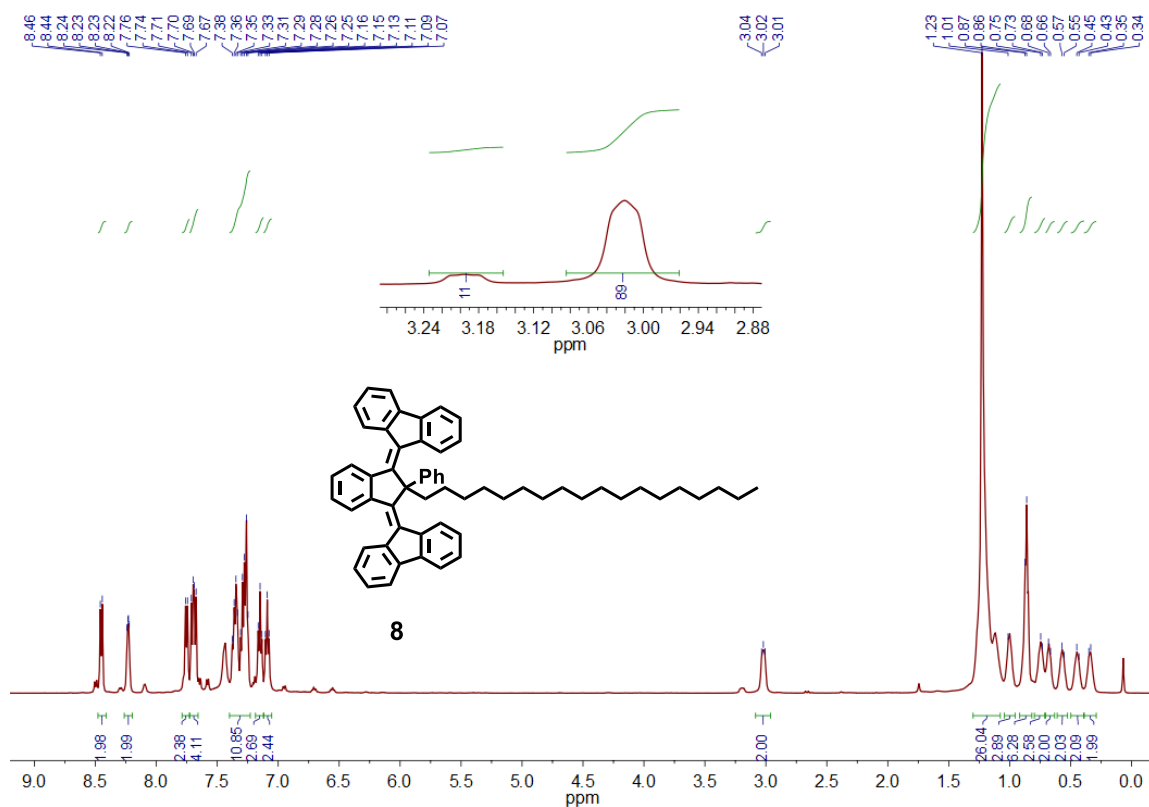

Figure S57. <sup>1</sup>H NMR spectrum (500 MHz, CDCl<sub>3</sub>, -45 °C) of **8**.

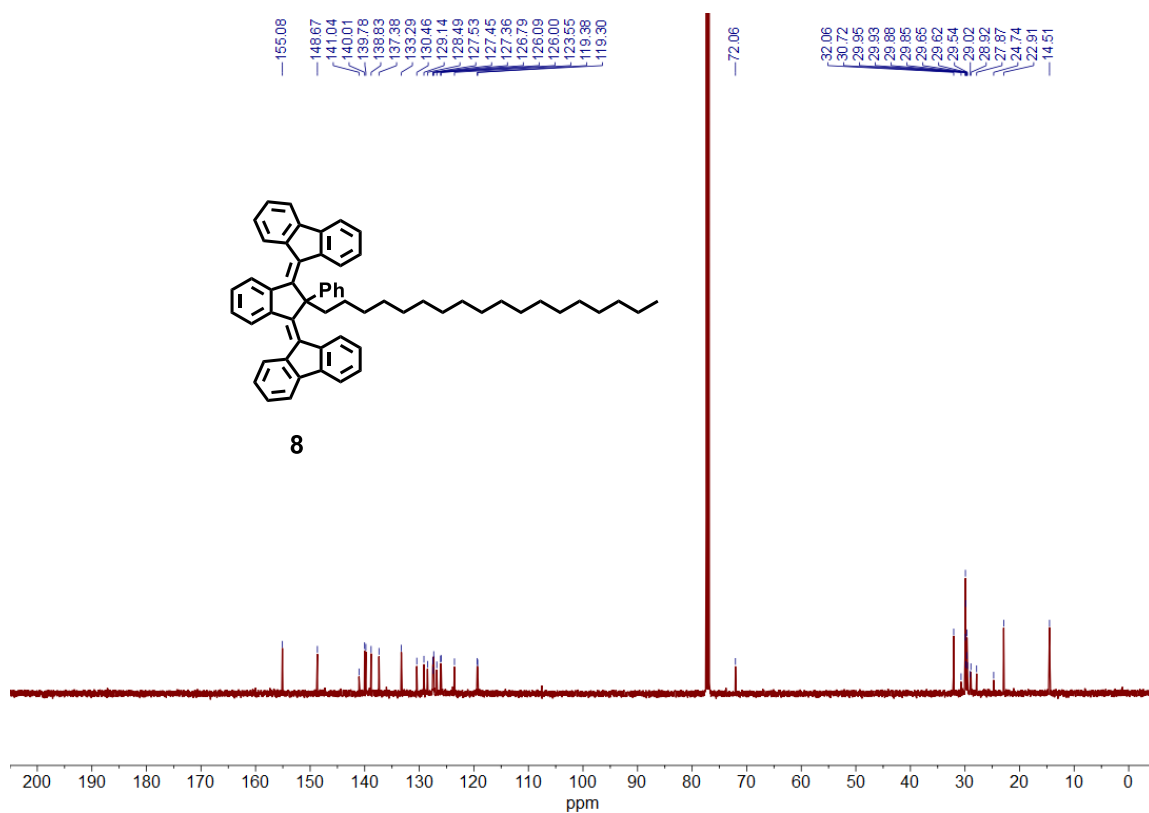

Figure S58. <sup>13</sup>C NMR spectrum (125 MHz, CDCl<sub>3</sub>, -45 °C) of **8**.

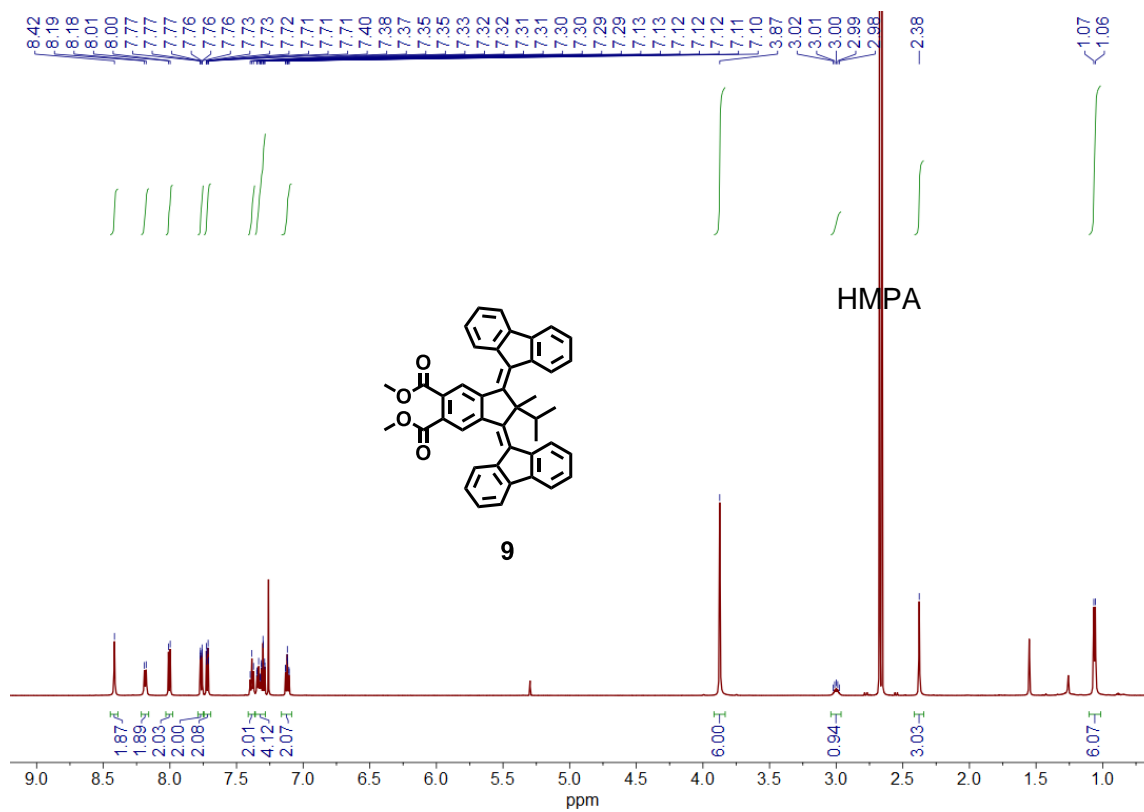

Figure S59. <sup>1</sup>H NMR spectrum (600 MHz, CDCl<sub>3</sub>, 25 °C) of **9**.

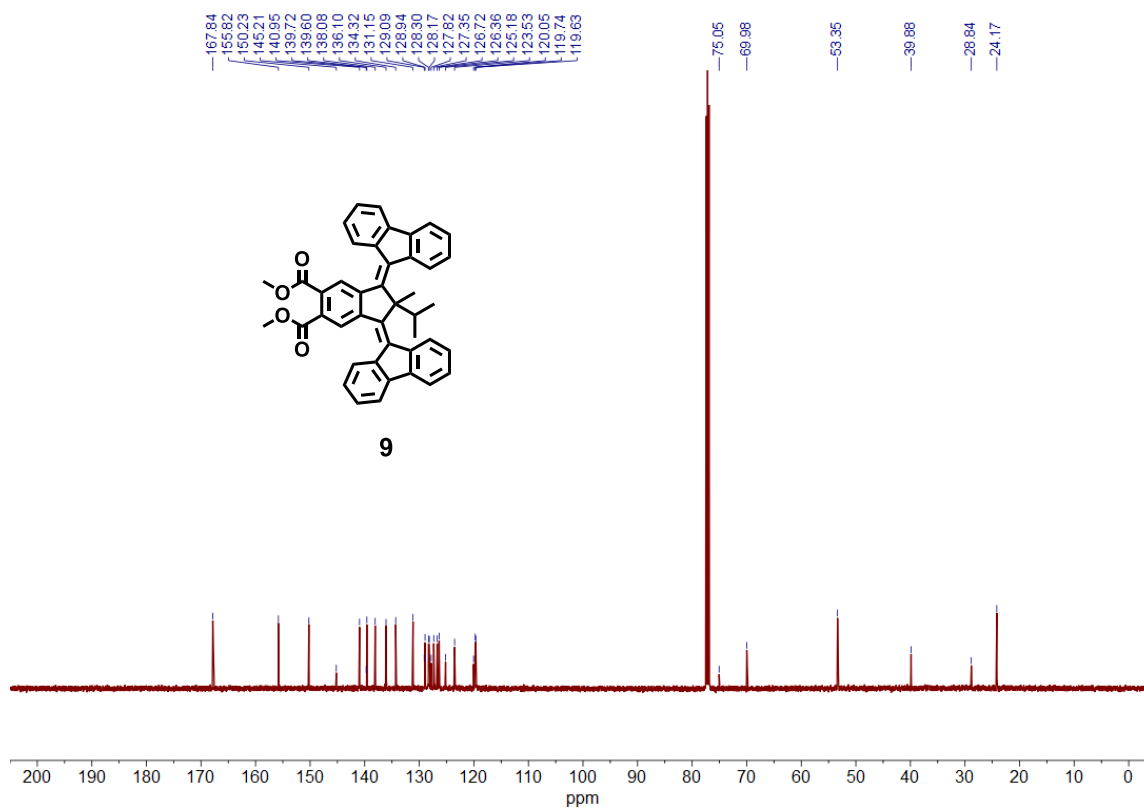

Figure S60. <sup>13</sup>C NMR spectrum (125 MHz, CDCl<sub>3</sub>, -45 °C) of **9**.

## Isomeric ratio and degree of unidirectionality of motors 2-8

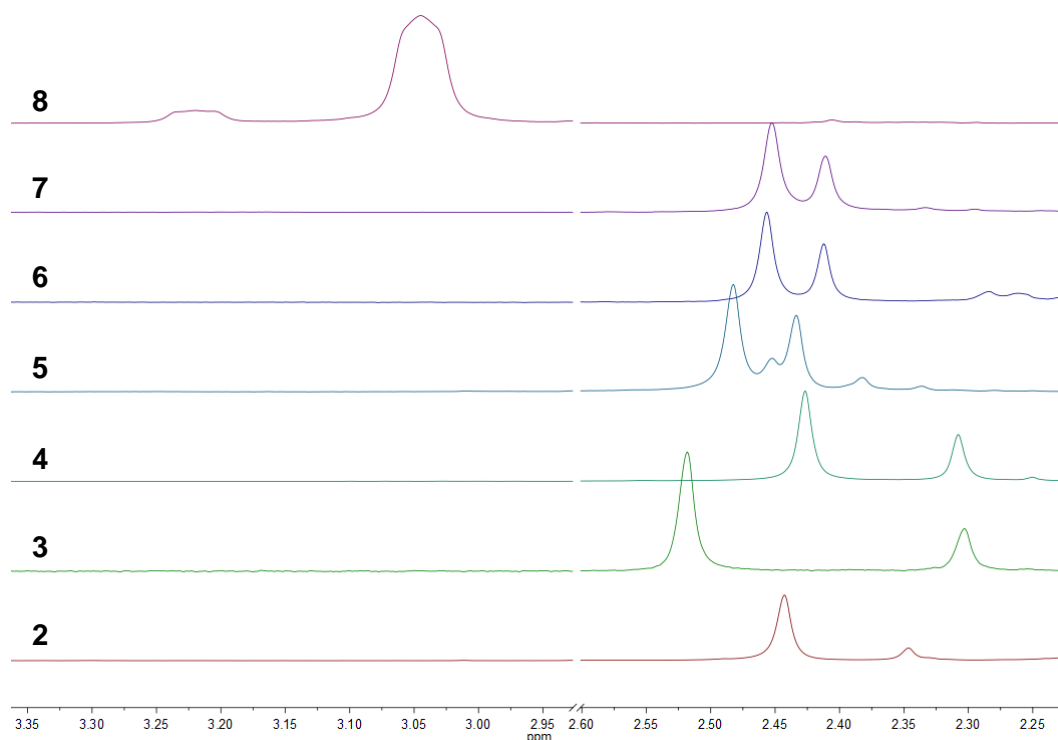

**Figure S61.**  $^1\text{H}$  NMR spectra (500 MHz,  $\text{CDCl}_3$ ,  $-45\text{ }^\circ\text{C}$ ) of motors 8, 7, 6, 5, 4, 3 and 2 (from top to bottom). Integration of the signals allowed determining the ratio between isomers and degree of unidirectional rotary motion for these motors at the given temperature (see Table S1).

**Table S1.** Determination of the ratio between *r*- and *s*-isomer of motors 2-8, and their consequent degree of unidirectionality, in  $\text{CDCl}_3$  at  $-45\text{ }^\circ\text{C}$ . Integral values and chemical shifts were obtained from analysis of the  $^1\text{H}$  NMR spectra shown in Figure S61.

| Motor | <i>r</i> -isomer<br>chemical<br>shift (ppm ) | <i>r</i> -isomer<br>percentage | <i>s</i> -isomer<br>chemical<br>shift (ppm ) | <i>s</i> -isomer<br>percentage | Degree of<br>unidirectionality |
|-------|----------------------------------------------|--------------------------------|----------------------------------------------|--------------------------------|--------------------------------|
| 2     | 3.22                                         | 17%                            | 3.04                                         | 83%                            | 66%                            |
| 3     | 2.30                                         | 25%                            | 2.52                                         | 75%                            | 50%                            |
| 4     | 2.31                                         | 34%                            | 2.43                                         | 66%                            | 32%                            |
| 5     | 2.43                                         | 42%                            | 2.48                                         | 58%                            | 16%                            |
| 6     | 2.41                                         | 38%                            | 2.46                                         | 62%                            | 24%                            |
| 7     | 2.41                                         | 38%                            | 2.45                                         | 62%                            | 24%                            |
| 8     | 3.22                                         | 11%                            | 3.04                                         | 89%                            | 78%                            |

## UV-vis spectra of motors 1-9

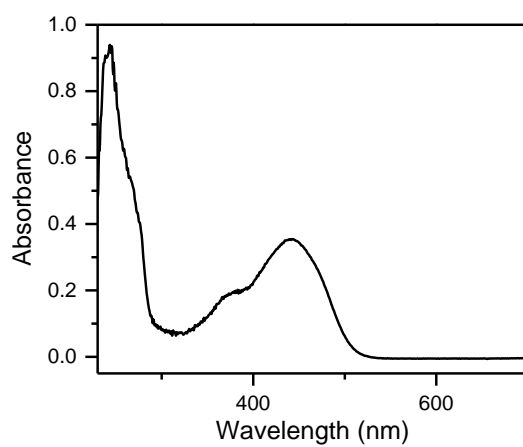

**Figure S62.** UV-vis spectrum ( $\text{CH}_2\text{Cl}_2$ ,  $5 \times 10^{-6}$  M, 25 °C) of 1.

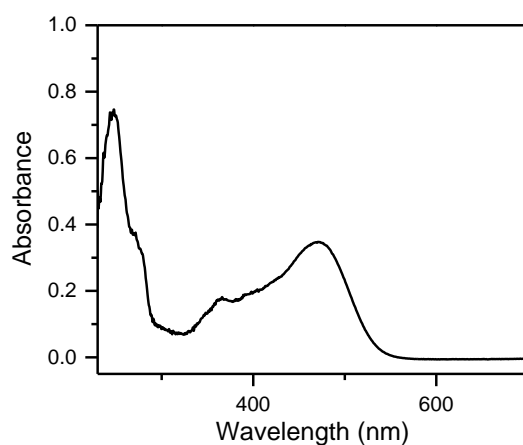

**Figure S63.** UV-vis spectrum ( $\text{CH}_2\text{Cl}_2$ ,  $5 \times 10^{-6}$  M, 25 °C) of 2.

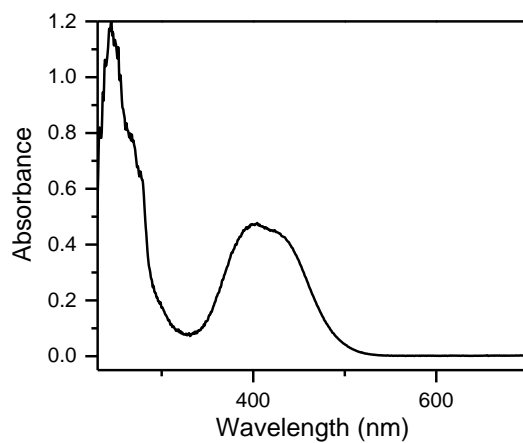

**Figure S64.** UV-vis spectrum ( $\text{CH}_2\text{Cl}_2$ ,  $5 \times 10^{-6}$  M, 25 °C) of 3.

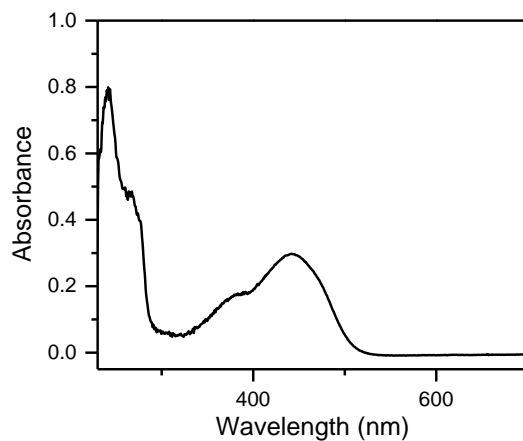

**Figure S65. UV-vis spectrum (CH<sub>2</sub>Cl<sub>2</sub>, 5 × 10<sup>-6</sup> M, 25 °C) of 4.**

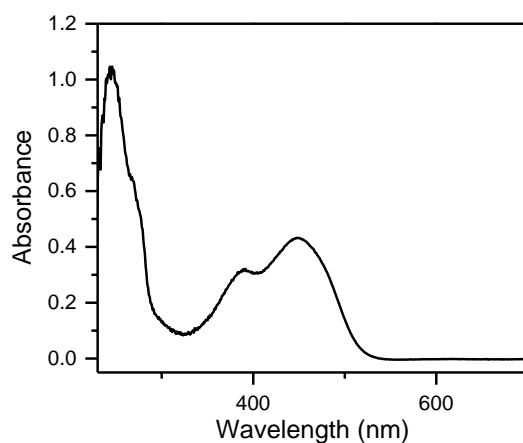

**Figure S66. UV-vis spectrum (CH<sub>2</sub>Cl<sub>2</sub>, 5 × 10<sup>-6</sup> M, 25 °C) of 5.**

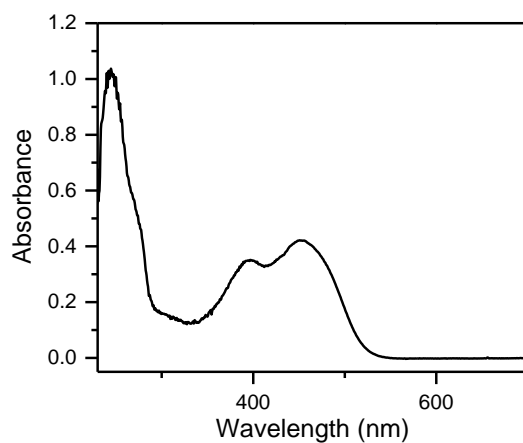

**Figure S67. UV-vis spectrum (CH<sub>2</sub>Cl<sub>2</sub>, 5 × 10<sup>-6</sup> M, 25 °C) of 6.**

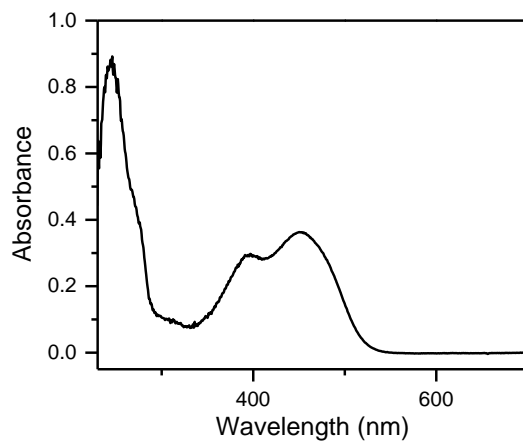

**Figure S68.** UV-vis spectrum ( $\text{CH}_2\text{Cl}_2$ ,  $5 \times 10^{-6}$  M, 25 °C) of **7**.

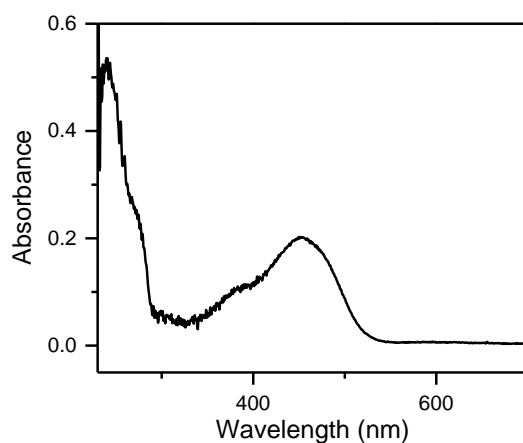

**Figure S69.** UV-vis spectrum ( $\text{CH}_2\text{Cl}_2$ ,  $5 \times 10^{-6}$  M, 25 °C) of **8**.

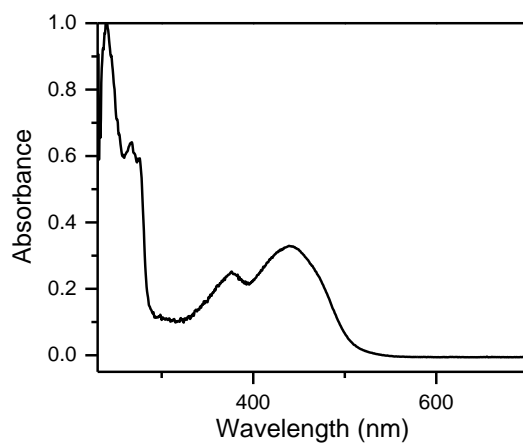

**Figure S70.** UV-vis spectrum ( $\text{CH}_2\text{Cl}_2$ ,  $5 \times 10^{-6}$  M, 25 °C) of **9**.

## IR spectra

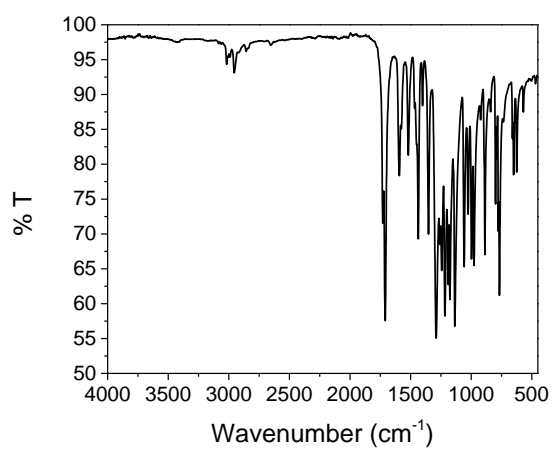

**Figure S71. FT-IR spectrum of 11.**

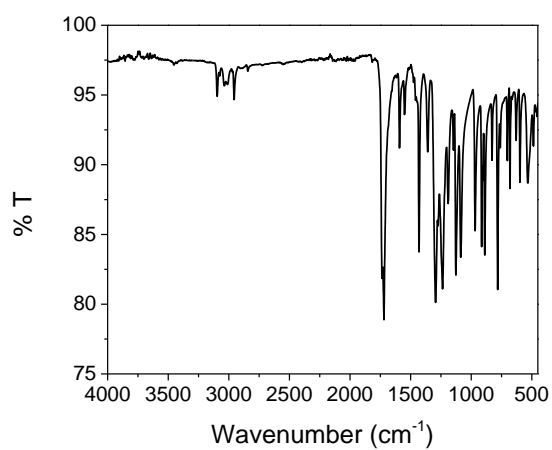

**Figure S72. FT-IR spectrum of 13.**

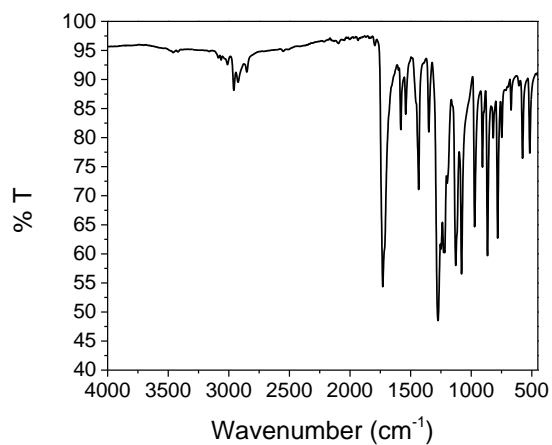

**Figure S73. FT-IR spectrum of 14.**



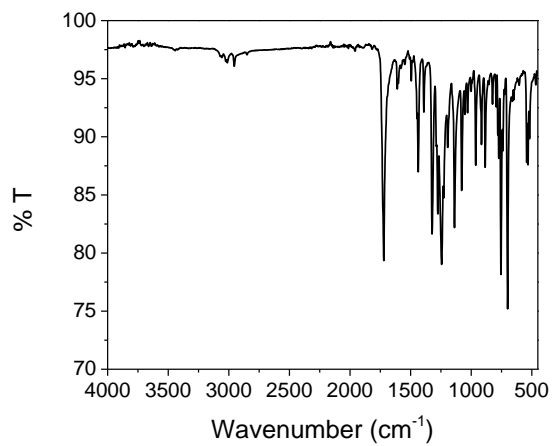

**Figure S74. FT-IR spectrum of 15.**

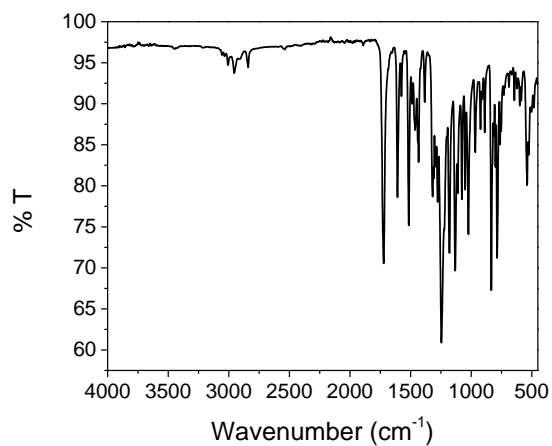

**Figure S75. FT-IR spectrum of 16.**

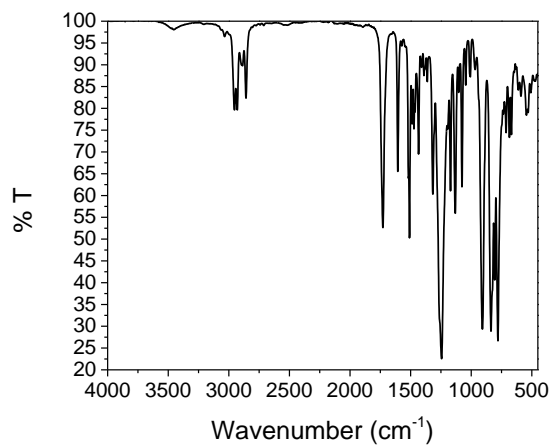

**Figure S76. FT-IR spectrum of 17.**

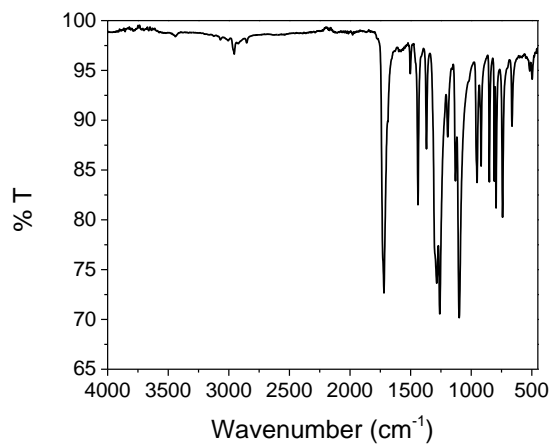

**Figure S77. FT-IR spectrum of 18.**

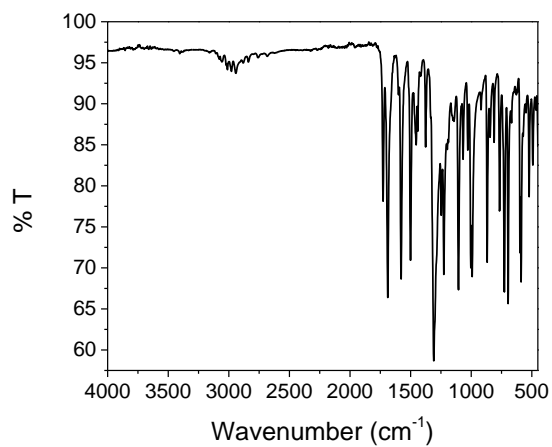

**Figure S78. FT-IR spectrum of 20.**

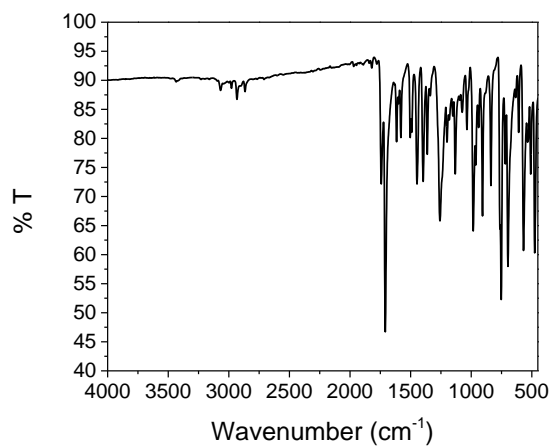

**Figure S79. FT-IR spectrum of 21.**

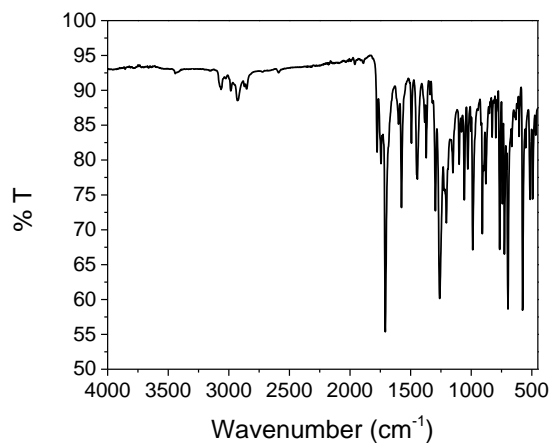

**Figure S80. FT-IR spectrum of 22.**

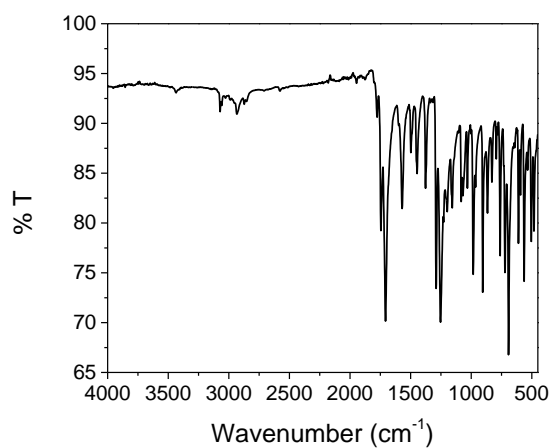

**Figure S81. FT-IR spectrum of 23.**

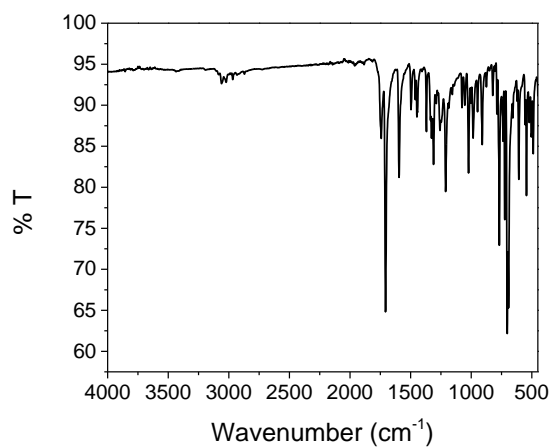

**Figure S82. FT-IR spectrum of 24.**

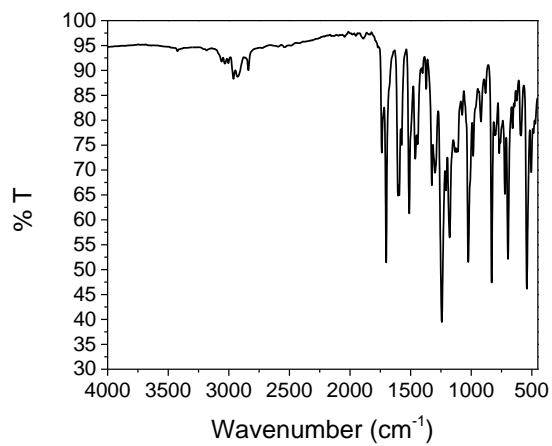

**Figure S83. FT-IR spectrum of 25.**

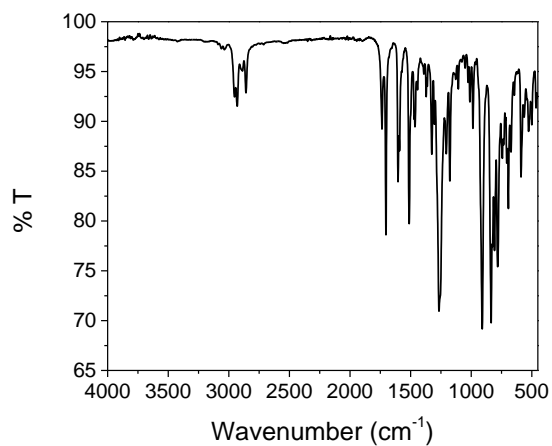

**Figure S84. FT-IR spectrum of 26.**

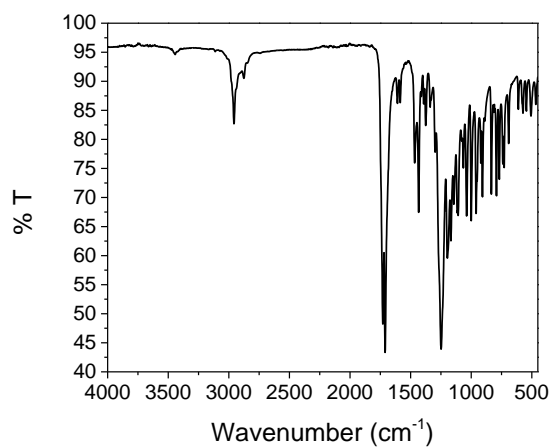

**Figure S85. FT-IR spectrum of 27.**

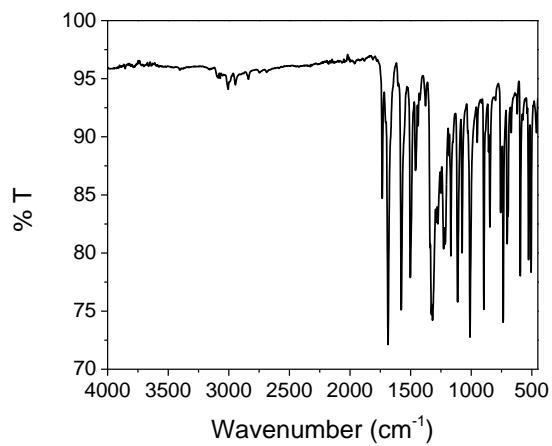

**Figure S86. FT-IR spectrum of 29.**

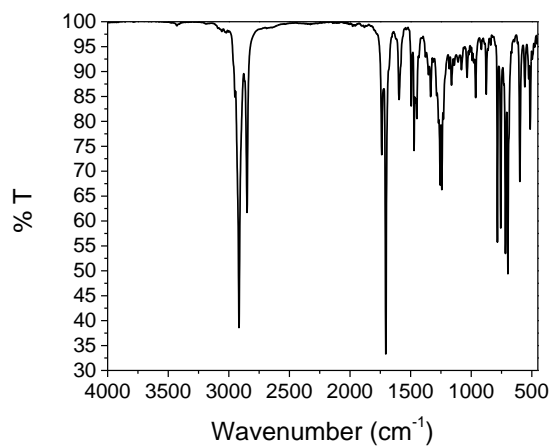

**Figure S87. FT-IR spectrum of 30.**

## Crystal structures

### Single-Crystal X-Ray Structures

Single-crystals were obtained by slow diffusion of hexane into saturated solutions of **2**, **4** and **5** in DCE. Figure S87 shows displacement ellipsoid plots of the refined structures.

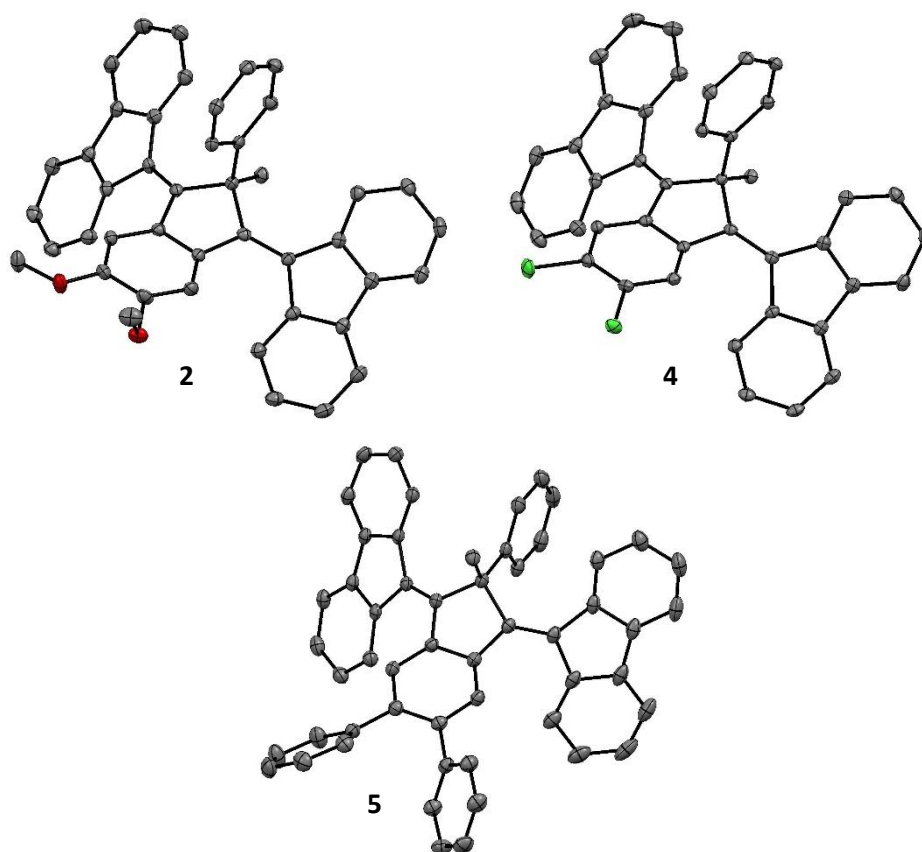

**Figure S88.** Single-crystal X-ray structures of compounds **2**, **4** and **5**. Displacement ellipsoid plot drawn at 50% probability; hydrogens and solvent molecules are omitted for clarity.

Table S2 shows a summary of critical parameters of single-crystal X-ray structures of compounds **2**, **4** and **5**.

**Table S2.** Summary of critical parameters of single-crystal X-ray structures of compounds **2**, **4** and **5**.

| Nr.                                                            | <b>2</b>                                                                                                      | <b>4</b>                                                                                                     | <b>5</b>                                                                                               |
|----------------------------------------------------------------|---------------------------------------------------------------------------------------------------------------|--------------------------------------------------------------------------------------------------------------|--------------------------------------------------------------------------------------------------------|
| Name                                                           | 9,9'-(5,6-Dimethoxy-2-methyl-2-phenyl-1 <i>H</i> -indene-1,3(2 <i>H</i> )-diylidene)bis(9 <i>H</i> -fluorene) | 9,9'-(5,6-Dichloro-2-methyl-2-phenyl-1 <i>H</i> -indene-1,3(2 <i>H</i> )-diylidene)bis(9 <i>H</i> -fluorene) | 9,9'-(2-Methyl-2,5,6-triphenyl-1 <i>H</i> -indene-1,3(2 <i>H</i> )-diylidene)bis(9 <i>H</i> -fluorene) |
| Formula                                                        | C <sub>44</sub> H <sub>32</sub> O <sub>2</sub>                                                                | C <sub>42</sub> H <sub>26</sub> Cl <sub>2</sub>                                                              | C <sub>54</sub> H <sub>36</sub> , C <sub>2</sub> H <sub>4</sub> Cl <sub>2</sub>                        |
| Molecular Weight                                               | 592.69                                                                                                        | 601.53                                                                                                       | 783.78                                                                                                 |
| Crystal System                                                 | monoclinic                                                                                                    | monoclinic                                                                                                   | monoclinic                                                                                             |
| T [K]                                                          | 100(2)                                                                                                        | 100(2)                                                                                                       | 100(2)                                                                                                 |
| Space Group                                                    | P 21/c                                                                                                        | P 21/n                                                                                                       | P 21/n                                                                                                 |
| a [Å]                                                          | 14.1264(3)                                                                                                    | 15.4794(4)                                                                                                   | 13.4014(3)                                                                                             |
| b [Å]                                                          | 11.2302(5)                                                                                                    | 11.3565(3)                                                                                                   | 16.7991(4)                                                                                             |
| c [Å]                                                          | 20.1932(5)                                                                                                    | 17.3278(4)                                                                                                   | 17.6974(4)                                                                                             |
| α [°]                                                          | 90                                                                                                            | 90                                                                                                           | 90                                                                                                     |
| β [°]                                                          | 108.1510(10)                                                                                                  | 100.2820(10)                                                                                                 | 94.0590(10)                                                                                            |
| γ [°]                                                          | 90                                                                                                            | 90                                                                                                           | 90                                                                                                     |
| V [Å <sup>3</sup> ]                                            | 3044.08(13)                                                                                                   | 2997.17(13)                                                                                                  | 3974.25(16)                                                                                            |
| Z                                                              | 4                                                                                                             | 4                                                                                                            | 4                                                                                                      |
| D <sub>calc</sub> [g·cm <sup>-3</sup> ]                        | 1.293                                                                                                         | 1.333                                                                                                        | 1.310                                                                                                  |
| F(0 0 0)                                                       | 1248                                                                                                          | 1248                                                                                                         | 1640                                                                                                   |
| h <sub>min</sub> , h <sub>max</sub>                            | -17, 17                                                                                                       | -19, 19                                                                                                      | -16, 16                                                                                                |
| k <sub>min</sub> , k <sub>max</sub>                            | -12, 14                                                                                                       | -14, 14                                                                                                      | -20, 20                                                                                                |
| l <sub>min</sub> , l <sub>max</sub>                            | -25, 25                                                                                                       | -21, 21                                                                                                      | -21, 22                                                                                                |
| μ [mm <sup>-1</sup> ]                                          | 0.602                                                                                                         | 2.172                                                                                                        | 1.765                                                                                                  |
| Crystal Size [mm]                                              | 0.20 x 0.20 x 0.10                                                                                            | 0.20 x 0.20 x 0.15                                                                                           | 0.24 x 0.20 x 0.18                                                                                     |
| Colour, Shape                                                  | clear_pale_red plate                                                                                          | clear_pale_red block                                                                                         | clear_pale_orange block                                                                                |
| R <sub>int</sub>                                               | 0.0320                                                                                                        | 0.0537                                                                                                       | 0.0598                                                                                                 |
| θ <sub>min</sub> , θ <sub>max</sub> [°]                        | 3.292, 79.075                                                                                                 | 3.529, 77.368                                                                                                | 3.632, 74.493                                                                                          |
| Total Reflections (before merge)                               | 31122                                                                                                         | 61550                                                                                                        | 72237                                                                                                  |
| Data (I>3 x sigma(I))<br>[Reflections, Restraints, Parameters] | 6492, 438, 0                                                                                                  | 6345, 398, 0                                                                                                 | 8113, 561, 5                                                                                           |
| S (=GooF)                                                      | 1.027                                                                                                         | 1.007                                                                                                        | 1.053                                                                                                  |
| Min. Residual Density [e/Å <sup>3</sup> ]                      | -0.239                                                                                                        | -0.310                                                                                                       | -0.595                                                                                                 |
| Max. Residual Density [e/Å <sup>3</sup> ]                      | 0.353                                                                                                         | 0.638                                                                                                        | 0.821                                                                                                  |
| Threshold Expression                                           | I>2sigma(I)                                                                                                   | I>2sigma(I)                                                                                                  | I>2sigma(I)                                                                                            |
| R <sub>1</sub>                                                 | 0.0479                                                                                                        | 0.0437                                                                                                       | 0.0578                                                                                                 |
| wR <sub>2</sub>                                                | 0.1059                                                                                                        | 0.0938                                                                                                       | 0.1296                                                                                                 |

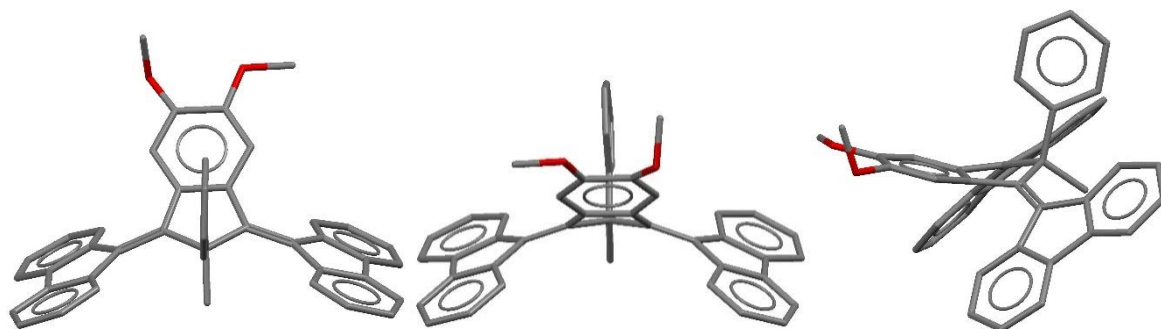

**Figure S89.** Front (left), back (middle) and side view of single-crystal X-ray structure of **2**. Hydrogens are omitted for clarity.

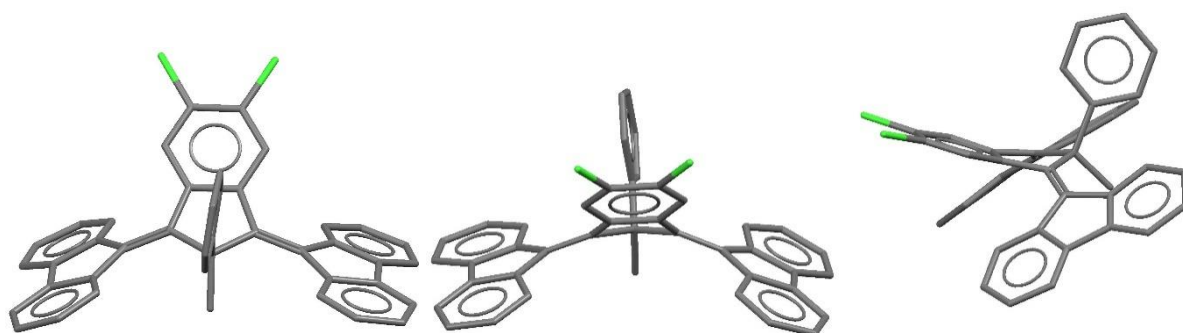

**Figure S90.** Front (left), back (middle) and side view of single-crystal X-ray structure of **4**. Hydrogens are omitted for clarity.

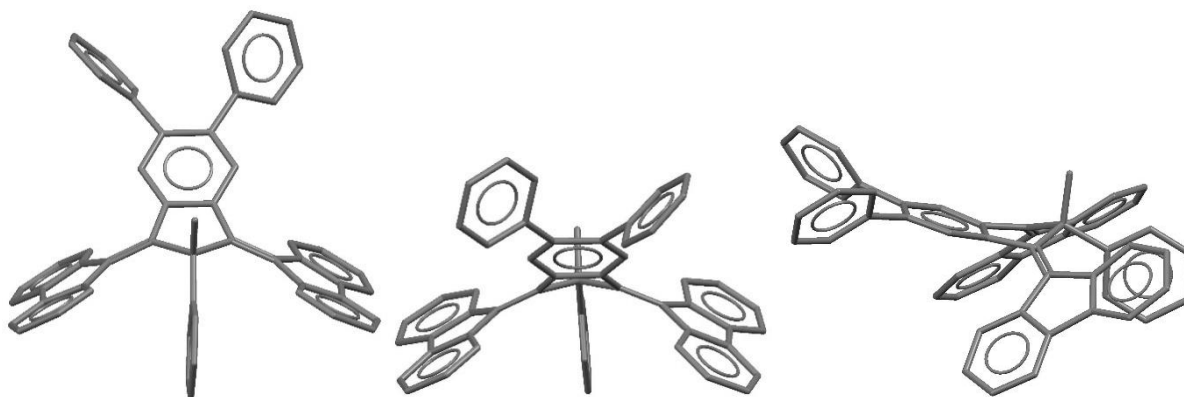

**Figure S91.** Front (left), back (middle) and side view of single-crystal X-ray structure of **5**. Hydrogens are omitted for clarity.



### TD-<sup>1</sup>H NMR experiments with motor 6

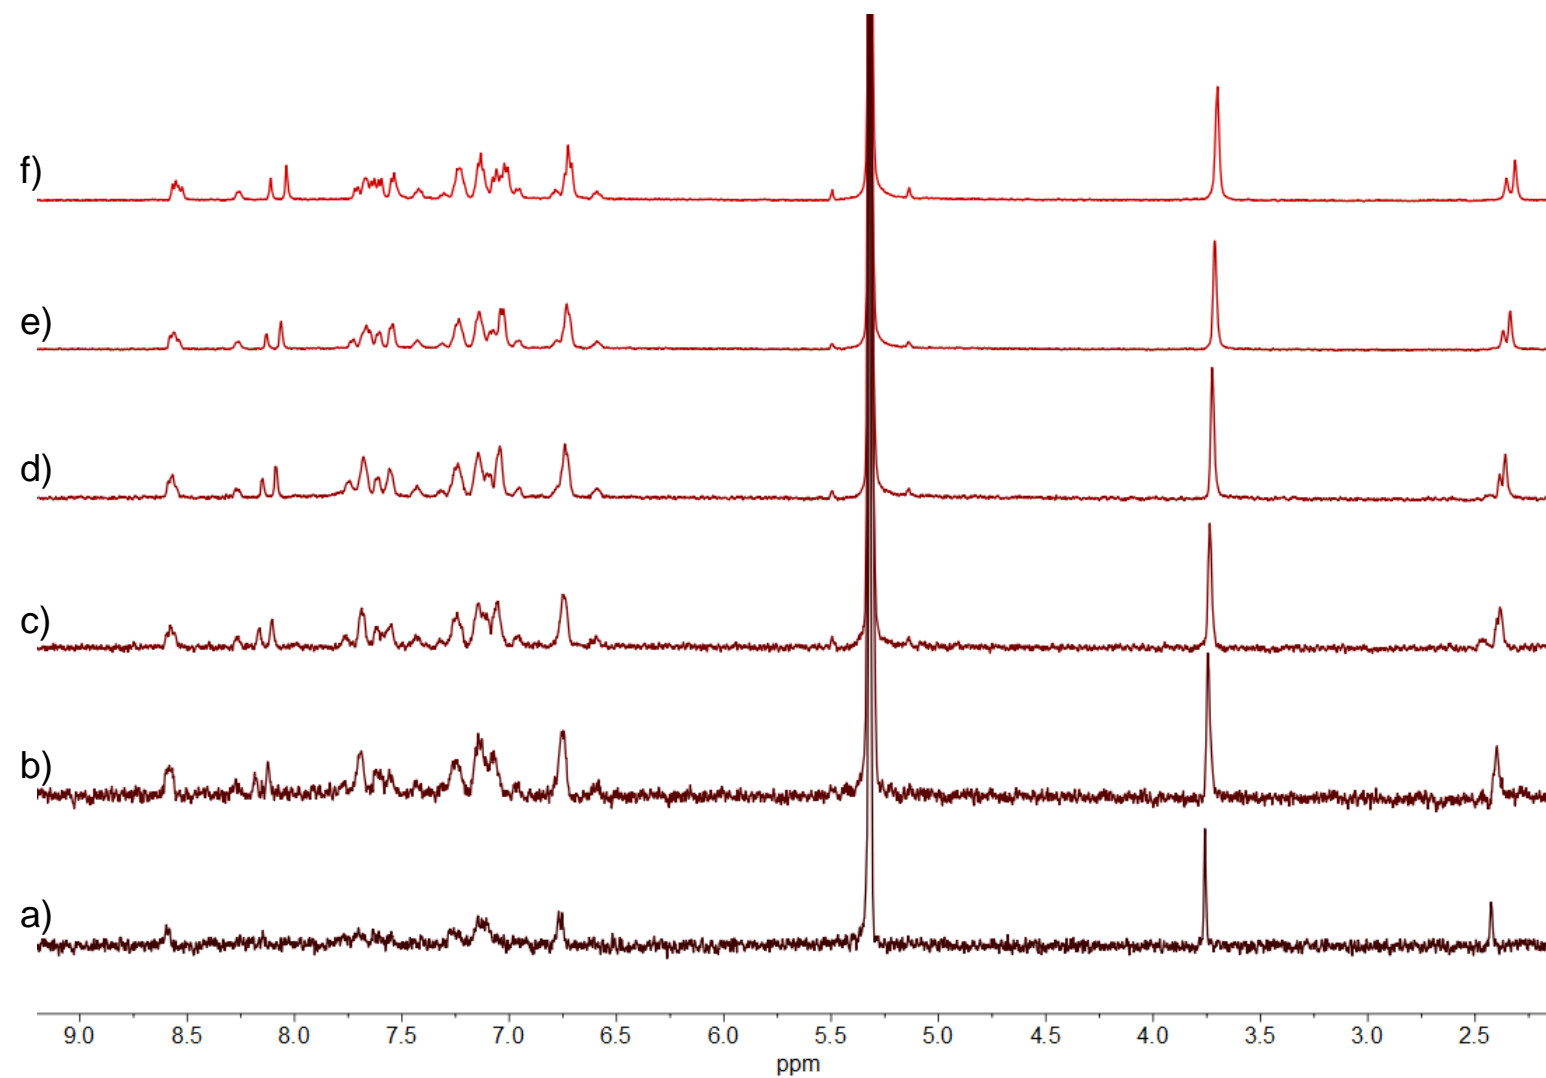

Figure S92. <sup>1</sup>H-NMR (CD<sub>2</sub>Cl<sub>2</sub>, 500 MHz) spectra of motor 6 at: a) 25 °C; b) 0 °C; c) -20 °C; d) -40 °C; e) -60 °C; f) -80 °C.

**$^1\text{H}$  NMR *in situ* irradiation experiments at  $-80\text{ }^\circ\text{C}$  with motor 6**

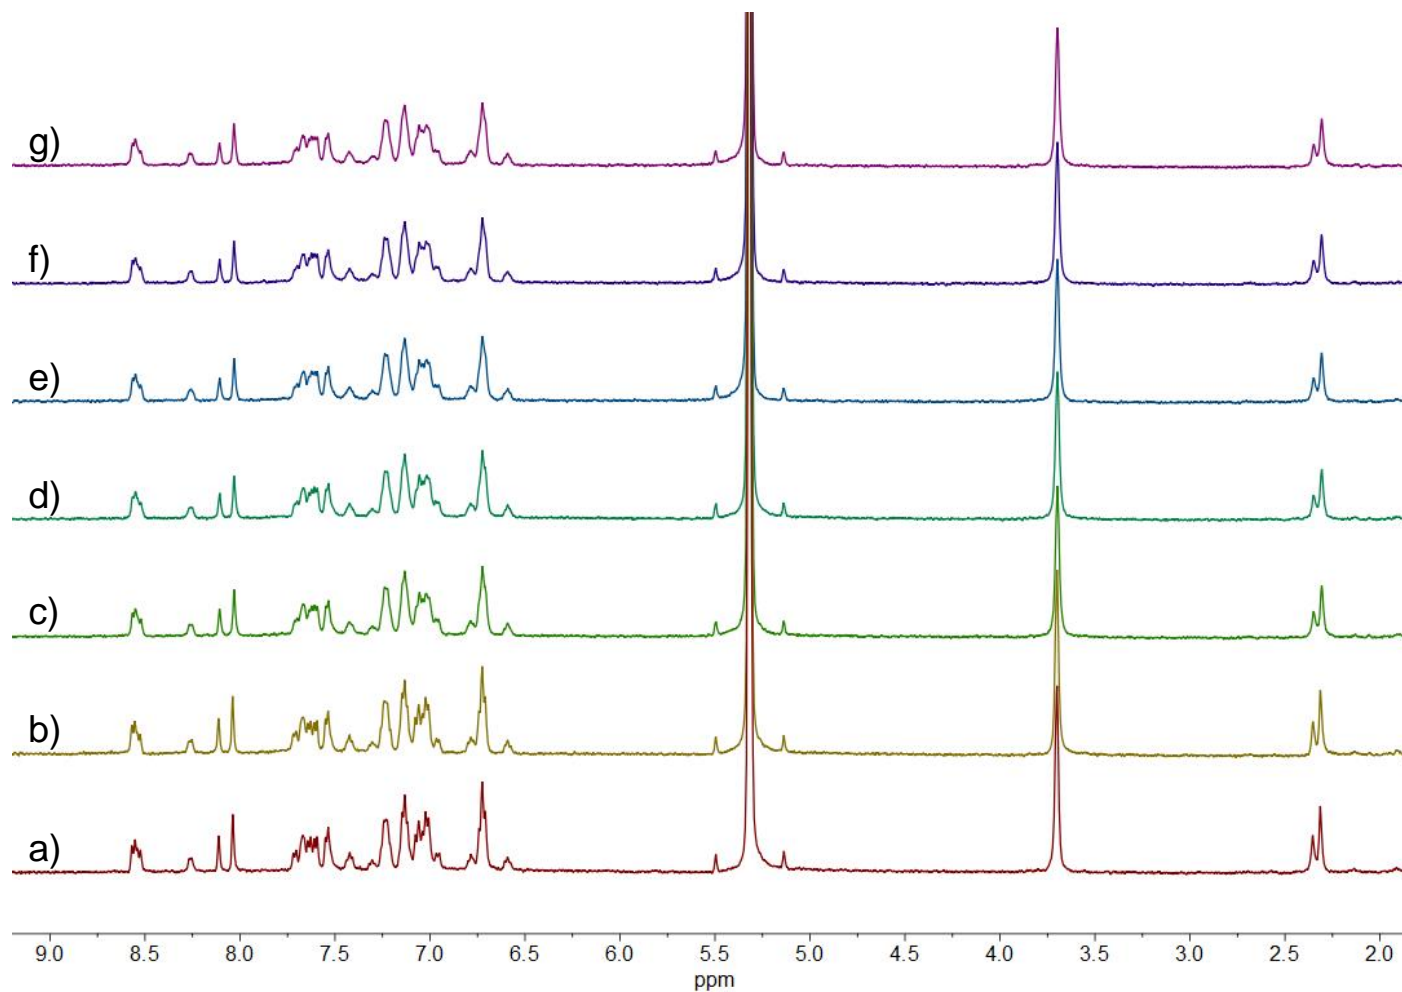

**Figure S93. *In situ*  $^1\text{H}$ -NMR ( $\text{CD}_2\text{Cl}_2$ , 500 MHz,  $-80\text{ }^\circ\text{C}$ ) irradiation experiment on motor 6. Traces: a) 6 at  $-80\text{ }^\circ\text{C}$ ; b) while irradiating with 365 nm light; c) 1 minute after irradiation with 365 nm light; d) while irradiating with 395 nm light; e) 1 minute after irradiation with 395 nm light; f) while irradiating with 455 nm light; g) 1 minute after irradiation with 455 nm light.**

## References

- S1 Buckle, D. R.; Morgan, N. J.; Ross, J. W.; Smith, H.; Spicer, B. A. Antiallergic Activity of 2-Nitroindan-1,3-Diones. *J. Med. Chem.* **1973**, *16* (12), 1334–1339.
- S2 Kistemaker, J. C. M.; Štacko, P.; Roke, D.; Wolters, A. T.; Heideman, G. H.; Chang, M. C.; Van Der Meulen, P.; Visser, J.; Otten, E.; Feringa, B. L. Third-Generation Light-Driven Symmetric Molecular Motors. *J. Am. Chem. Soc.* **2017**, *139* (28), 9650–9661.
